# Supplementary material for: Hydrotris(3-mesitylpyrazolyl)borato-copper(i) alkyne complexes: synthesis, structural characterization and rationalization of their activities as alkyne cyclopropenation catalysts
Source: Royal Society of Chemistry journal article supplement (doi:10.1039/c2dt11951j), 2012-01-01
Supplement: c2dt11951j.pdf [file c2dt11951j.pdf]

## Electronic Supporting Information

# Hydrotris(3-mesitylpyrazolyl)borato-copper(I) alkyne complexes: synthesis, structural characterization and rationalization of their activities as alkyne cyclopropanation catalysts.

Carmen Martín,<sup>a</sup> Marta Sierra,<sup>a</sup> Eleuterio Alvarez,<sup>b</sup> Tomás R. Belderrain,<sup>\*a</sup> Pedro J. Pérez<sup>\*a</sup>

*<sup>a</sup>Laboratorio de Catálisis Homogénea, Departamento de Química y Ciencia de los Materiales, Unidad Asociada al CSIC, Centro de Investigación en Química Sostenible, CIQSO-Universidad de Huelva, Campus de El Carmen s/n, 21007-Huelva, Spain.*

*<sup>b</sup>Instituto de Investigaciones Químicas, CSIC-Universidad de Sevilla, Avenida de Américo Vespucio 49, 41092 Sevilla, Spain.*

[perez@dqcm.uhu.es](mailto:perez@dqcm.uhu.es), [trodri@dqcm.uhu.es](mailto:trodri@dqcm.uhu.es)

## **Table of Contents**

|      |                                                                                   |     |
|------|-----------------------------------------------------------------------------------|-----|
| I.   | NMR spectra of $\text{Tp}^{\text{Ms}}\text{Cu}(1\text{-hexyne})$ complexes        | S3  |
| II.  | $^1\text{H}$ NMR spectra and GC of the final cyclopropanation reaction mixtures   | S7  |
| III. | X Ray crystal structure analyses for complexes <b>1</b> , <b>2</b> and <b>3</b> . | S11 |

## I. NMR spectra of $\text{Tp}^{\text{Ms}}\text{Cu}(\text{alkyne})$ complexes

**Figure 1.**  $^1\text{H}$  NMR spectrum of  $\text{Tp}^{\text{Ms}}\text{Cu}(\text{1-hexyne})$ , **1**, in  $\text{C}_6\text{D}_6$  (400 MHz).

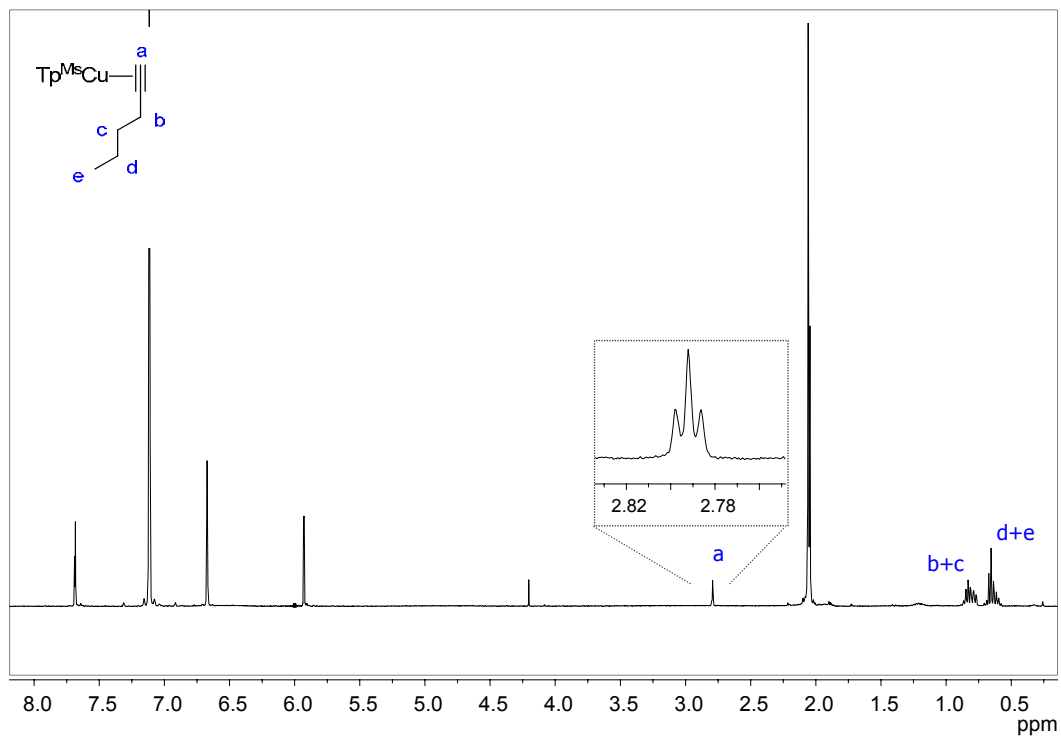

**Figure 2.**  $^{13}\text{C}$  NMR spectrum of  $\text{Tp}^{\text{Ms}}\text{Cu}(\text{1-hexyne})$ , **1**, in  $\text{C}_6\text{D}_6$  (100 MHz).

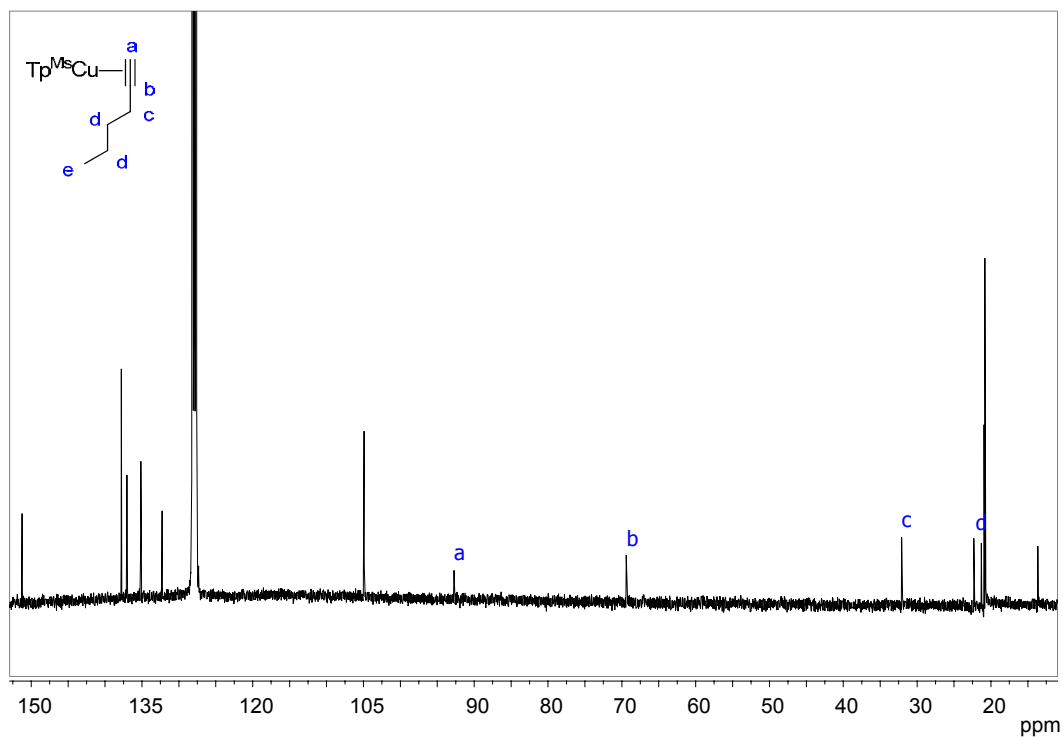

**Figure 3.**  $^1\text{H}$  NMR spectrum of  $\text{Tp}^{\text{Ms}}\text{Cu}(\text{phenylacetylene})$ , **2**, in  $\text{C}_6\text{D}_6$  (400 MHz).

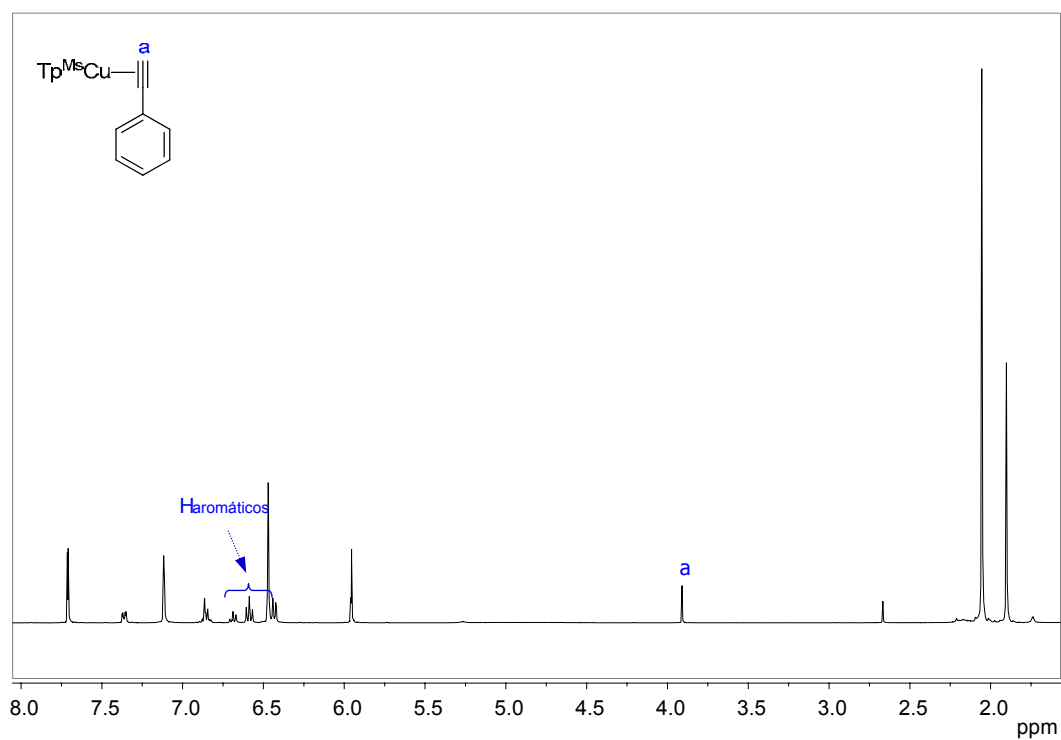

**Figure 4.**  $^{13}\text{C}$  NMR spectrum of  $\text{Tp}^{\text{Ms}}\text{Cu}(\text{phenylacetylene})$ , **2**, in  $\text{C}_6\text{D}_6$  (100 MHz).

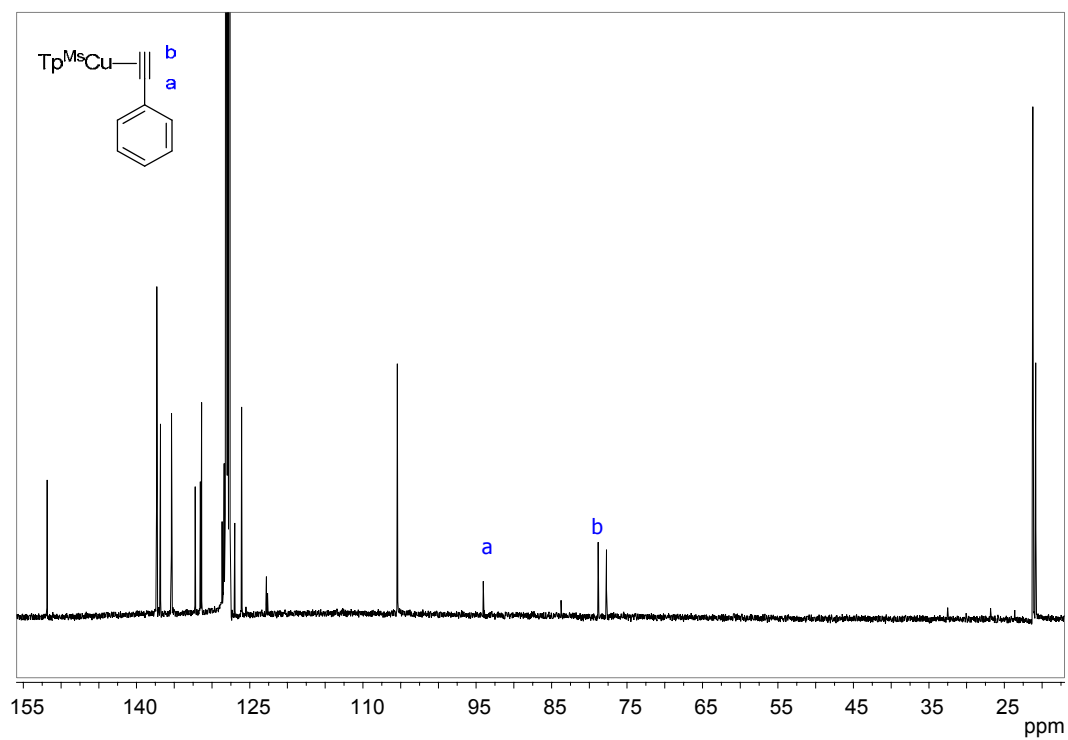

**Figure 5.**  $^1\text{H}$  NMR spectrum of  $\text{Tp}^{\text{Ms}}\text{Cu}(\text{ethyl propiolate})$ , **3**, in  $\text{CDCl}_3$  (400 MHz).

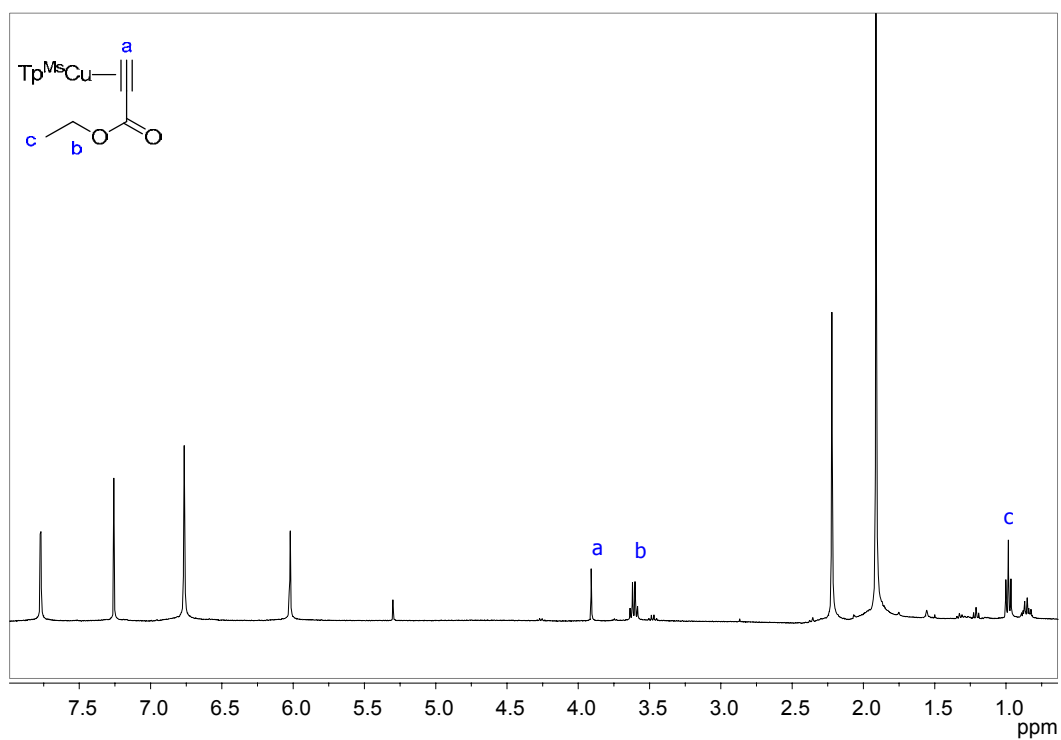

**Figure 6.**  $^{13}\text{C}$  NMR spectrum of  $\text{Tp}^{\text{Ms}}\text{Cu}(\text{ethyl propiolate})$ , **3**, in  $\text{CDCl}_3$  (100 MHz).

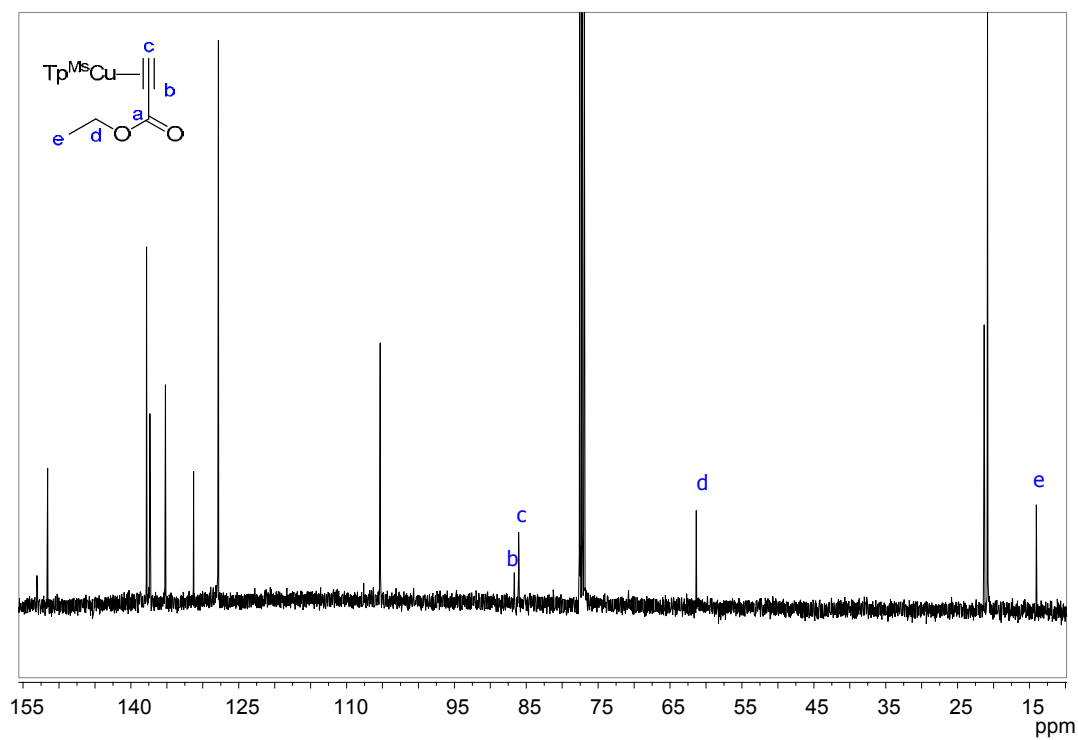

**Figure 7.**  $^1\text{H}$  NMR spectrum of  $\text{Tp}^{\text{Ms}}\text{Cu}(3\text{-hexyne})$ , **4**, in  $\text{C}_6\text{D}_6$  (400 MHz).

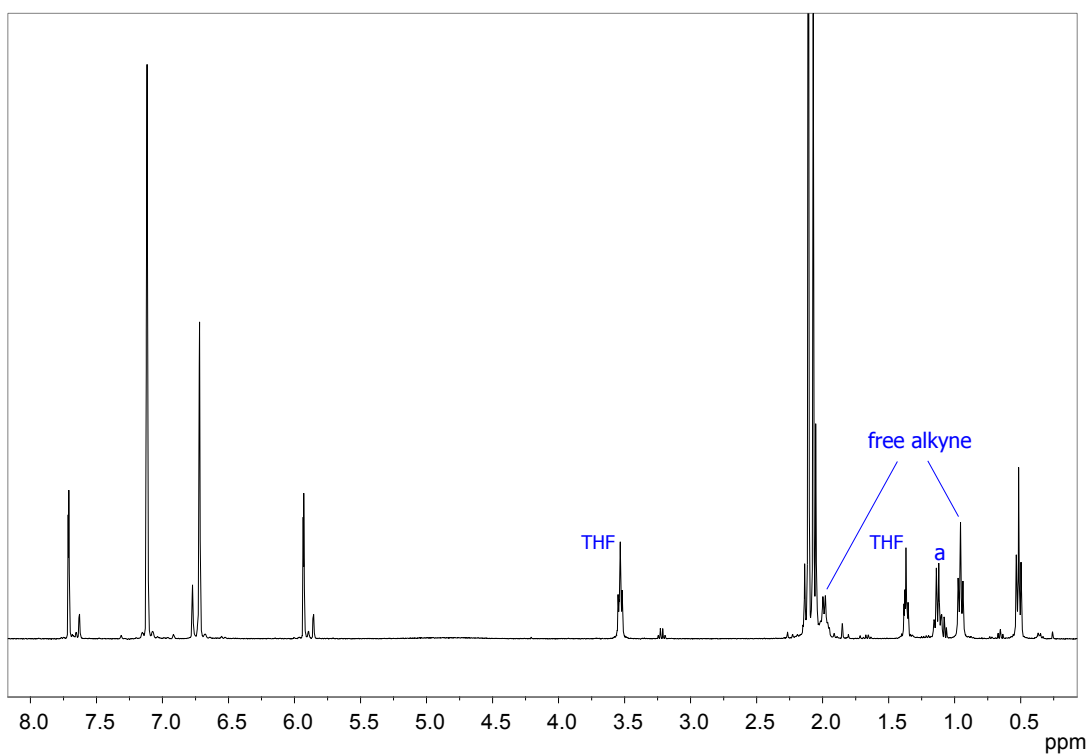

## II. $^1\text{H}$ NMR spectra and GC of the final cyclopropanation reaction mixtures.

a) Ethyl 2-butylcycloprop-2-enecarboxylate.

**Figure 8.**  $^1\text{H}$  NMR spectrum of the final cyclopropanation reaction mixture of 1-hexyne with EDA in the presence of  $\text{Tp}^{\text{Br}3}\text{Cu}(\text{CNMe})$  as catalyst in  $\text{CDCl}_3$ .

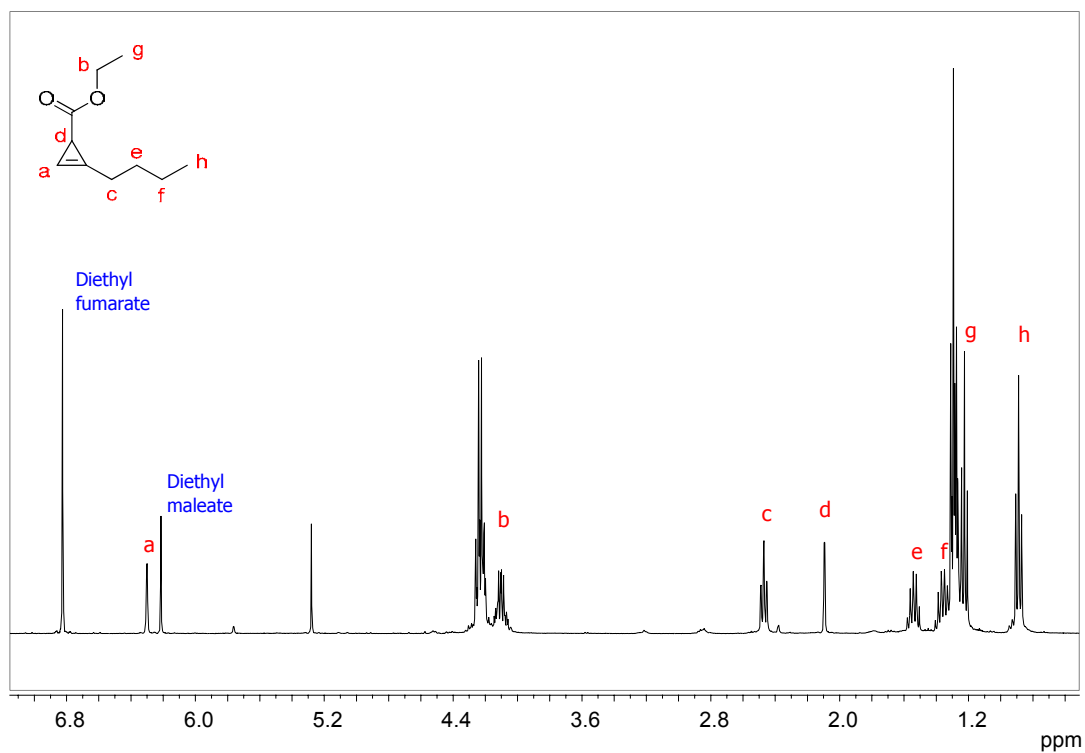

$^1\text{H}$  NMR (400 MHz,  $\text{CDCl}_3$ )  $\delta$  6.30 (d,  $^3J = 1.4$  Hz, 1H), 4.11 (q,  $^3J = 7.1$  Hz, 2H), 2.47 (t,  $^3J = 7.4$  Hz, 2H), 2.09 (d,  $^3J = 1.5$  Hz, 1H), 1.54 (m, 2H), 1.35 (m, 2H), 1.23 (t,  $^3J = 7.1$  Hz, 3H), 0.89 (t,  $^3J = 7.3$  Hz, 3H).

**Figure 9.** GC chromatogram of the reaction mixture after total consumption of EDA obtained from the cyclopropanation reaction of 1-hexyne.

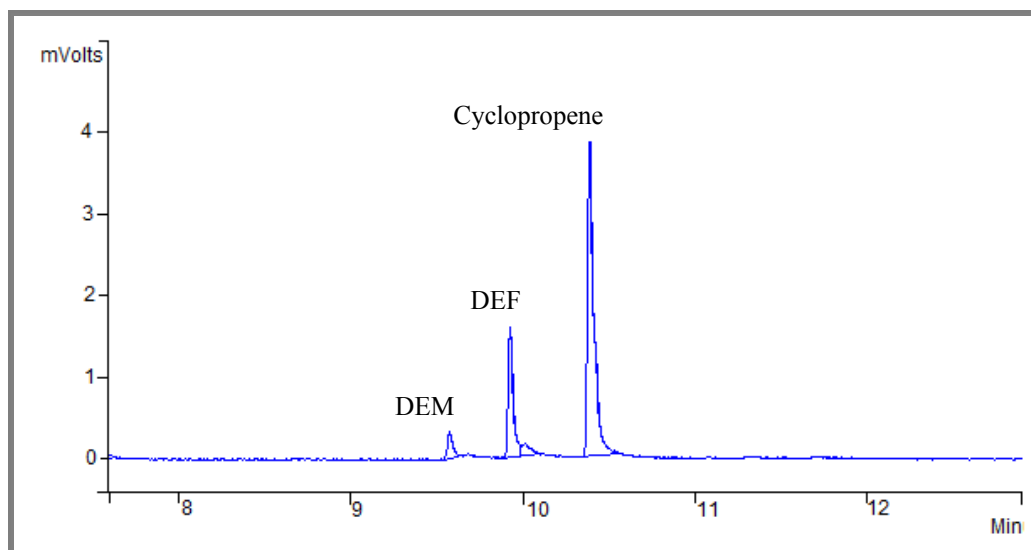

- Column: CP-Sil 8CB (Varian Capillary Column: 30m, 0.25 mm, 0.25  $\mu$ m CP8751)
- Detector: FID
- $T_0$ : 50  $^{\circ}$ C
- $T_f$ : 250  $^{\circ}$ C
- Rate: 10  $^{\circ}$ C/min
- Injector temperature: 225  $^{\circ}$ C
- Detector temperature: 255  $^{\circ}$ C

| <b>Products</b>        | <b><math>t_R</math> (min)</b> |
|------------------------|-------------------------------|
| Diethyl maleate (DEM)  | 9.5                           |
| Diethyl fumarate (DEF) | 9.9                           |
| Cyclopropene           | 10.4                          |



b) Ethyl 2,3-diethylcycloprop-2-enecarboxylate.

**Figure 10.**  $^1\text{H}$  NMR spectrum of the final cyclopropanation reaction mixture reaction of 3-hexyne with EDA in the presence of  $\text{Tp}^{\text{Br}_3}\text{Cu}(\text{CNMe})$  as catalyst in  $\text{CDCl}_3$ .

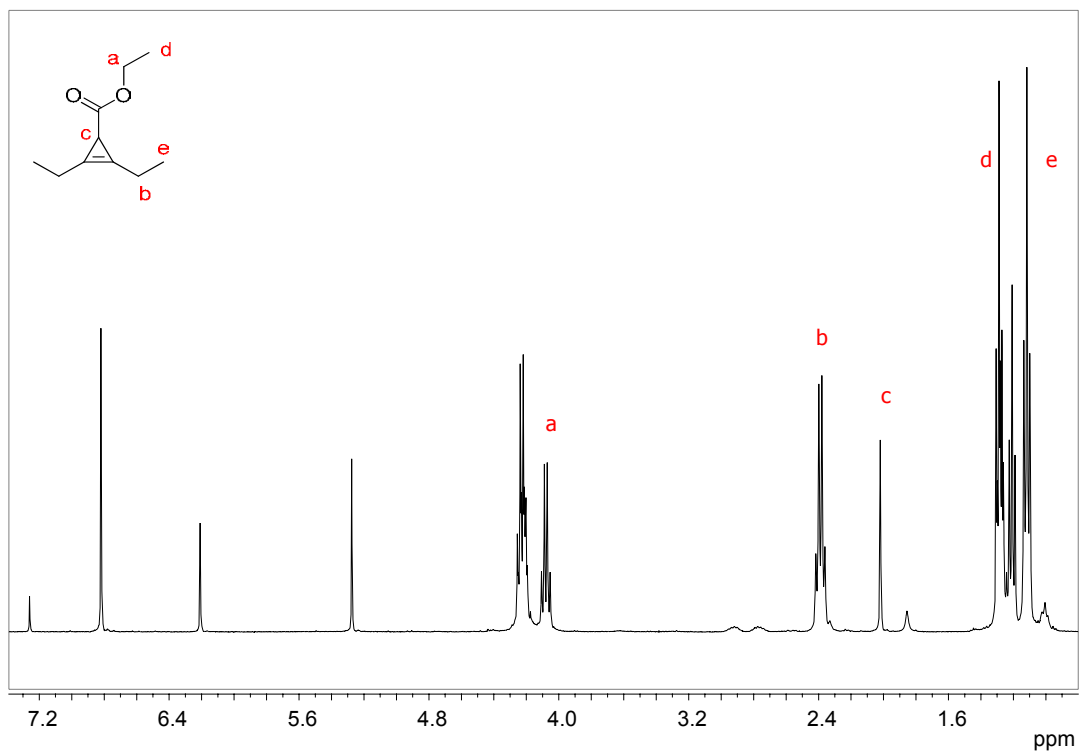

$^1\text{H}$  NMR (400 MHz,  $\text{CDCl}_3$ )  $\delta$  4.08 (q,  $^3J = 7.1$  Hz, 2H), 2.39 (q,  $^3J = 7.5$  Hz, 2H), 2.01 (s, 1H), 1.29 (t,  $^3J = 7.1$  Hz, 3H), 1.12 (t,  $^3J = 7.4$  Hz, 3H).

**Figure 11.** GC chromatogram of the reaction mixture after total consumption of EDA obtained from the cyclopropanation reaction of 3-hexyne.

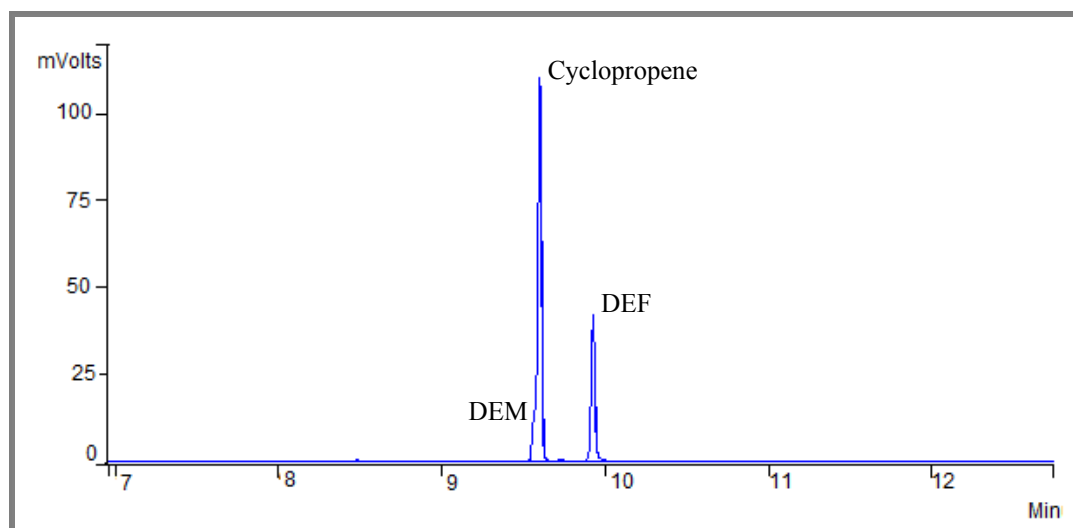

- Column: CP-Sil 8CB (Varian Capillary Column: 30m, 0.25 mm, 0.25  $\mu$ m CP8751)
- Detector: FID
- $T_0$ : 60  $^{\circ}$ C
- $T_f$ : 250  $^{\circ}$ C
- Rate: 10  $^{\circ}$ C/min
- Injector temperature: 225  $^{\circ}$ C
- Detector temperature: 255  $^{\circ}$ C

| Products               | $t_R$ (min) |
|------------------------|-------------|
| Diethyl maleate (DEM)  | 9.5         |
| Diethyl fumarate (DEF) | 9.9         |
| Cyclopropene           | 9.6         |

### III. X Ray crystal structure analysis for 1-3.

*Crystal data for 1:*  $C_{87}H_{106}B_2C_{16}Cu_2N_{12}$ ,  $M = 1681.26$ , triclinic,  $P\bar{1}$ ,  $a = 11.1908(5)$ ,  $b = 12.0506(5)$ ,  $c = 16.6731(7)$  Å,  $\alpha = 77.7080(9)^\circ$ ,  $\beta = 83.1730(10)^\circ$ ,  $\gamma = 89.2120(10)^\circ$ ,  $V = 2181.19(16)$  Å<sup>3</sup>,  $Z = 1$ ,  $D_c = 1.280$  Mg/m<sup>3</sup>, absorption coefficient  $0.722$  mm<sup>-1</sup>,  $T = 173(2)$  K, colourless prisms; 13139 independent measured reflections ( $R_{int} = 0.0266$ ),  $F^2$  refinement, final R indices [ $I > 2\sigma(I)$ ]  $R1 = 0.0481$ ,  $wR2 = 0.1287$ , R indices (all data)  $R1 = 0.0664$ ,  $wR2 = 0.1437$ .

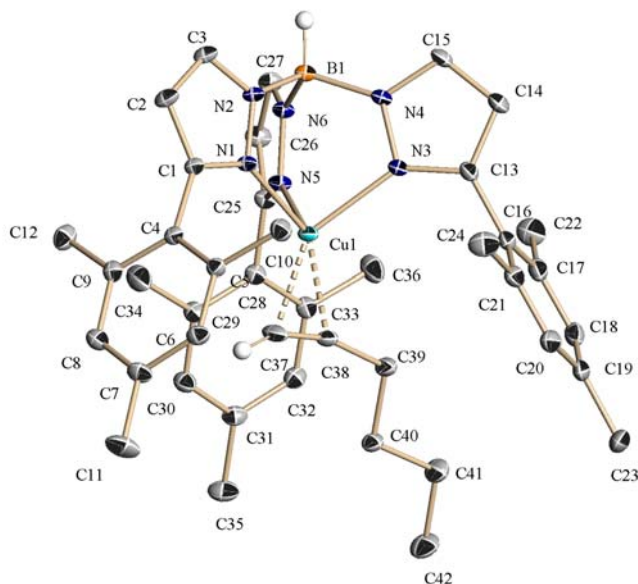

*Crystal data for 2:*  $C_{52}H_{52}BCuN_6$  [ $C_{44}H_{46}BCuN_6$ ,  $C_8H_6$ ],  $M = 835.35$ , monoclinic,  $P2_1/n$ ,  $a = 9.1406(6)$ ,  $b = 20.6632(15)$ ,  $c = 23.8733(17)$  Å,  $\alpha = 90^\circ$ ,  $\beta = 97.186(2)^\circ$ ,  $\gamma = 90^\circ$ ,  $V = 4473.6(5)$  Å<sup>3</sup>,  $Z = 4$ ,  $D_c = 1.240$  Mg/m<sup>3</sup>, absorption coefficient  $0.531$  mm<sup>-1</sup>,  $T = 173(2)$  K, colourless prisms; 13516 independent measured reflections ( $R_{int} = 0.0652$ ),  $F^2$  refinement, final R indices [ $I > 2\sigma(I)$ ]  $R1 = 0.0463$ ,  $wR2 = 0.1001$ , R indices (all data)  $R1 = 0.0769$ ,  $wR2 = 0.1142$ . In this case, a free phenylacetylene molecule was observed in the unit cell.

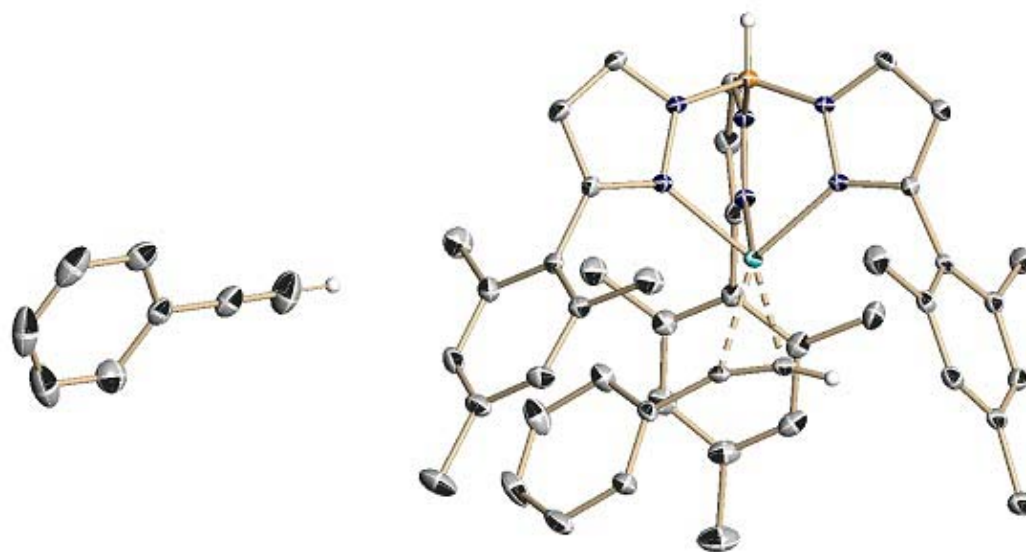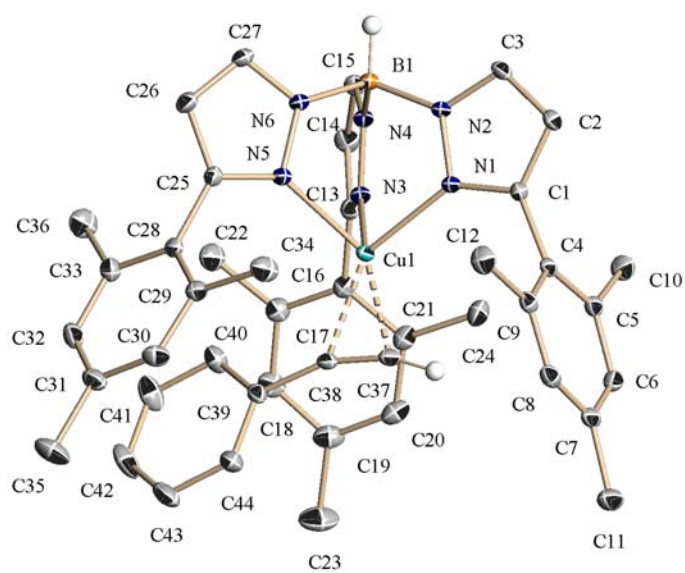

*Crystal data for 3:*  $C_{165}H_{186}B_4Cl_2Cu_4N_{24}O_8$  [ $4(C_{41}H_{46}BCuN_6O_2)$ ,  $CH_2Cl_2$ ],  $M = 3001.68$ , triclinic,  $P\bar{1}$ ,  $a = 9.0009(7)$ ,  $b = 11.2392(9)$ ,  $c = 38.765(3)$  Å,  $\alpha = 97.899(2)^\circ$ ,  $\beta = 97.186(2)^\circ$ ,  $\gamma = 90^\circ$ ,  $V = 3875.5(5)$  Å<sup>3</sup>,  $Z = 1$ ,  $D_c = 1.286$  Mg/m<sup>3</sup>, absorption coefficient  $0.641$  mm<sup>-1</sup>,  $T = 100(2)$  K, colourless prisms; 23921 independent measured reflections ( $R_{int} = 0.0544$ ),  $F^2$  refinement, final R indices [ $I > 2\sigma(I)$ ]  $R1 = 0.0776$ ,  $wR2 = 0.1802$ , R indices (all data)  $R1 = 0.1021$ ,  $wR2 = 0.1900$ . The two different molecules in the cell unit are shown.

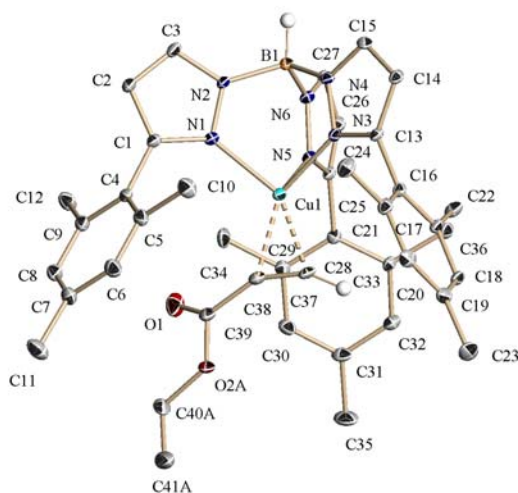

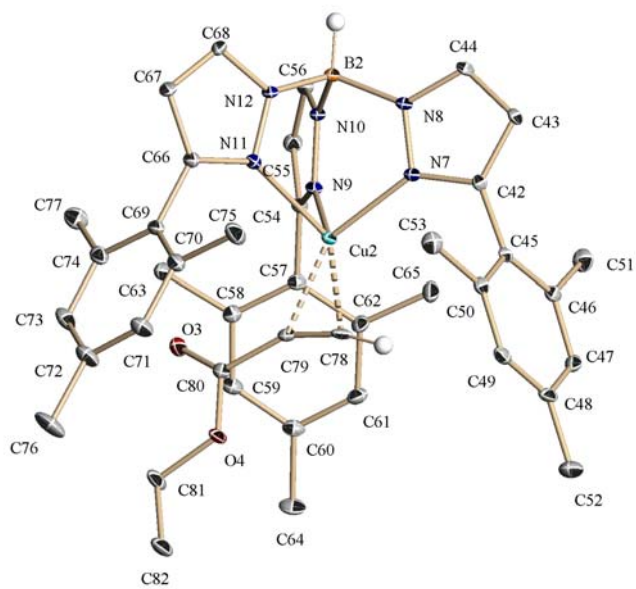

Table 1. Crystal data and structure refinement for  $\text{Tp}^{\text{Ms}}\text{Cu}(\text{1-hexyne})$ , **1**.

|                                      |                                                                                                                                                                  |                                |
|--------------------------------------|------------------------------------------------------------------------------------------------------------------------------------------------------------------|--------------------------------|
| Empirical formula                    | $\text{C}_{87}\text{H}_{106}\text{B}_2\text{C}_{16}\text{Cu}_2\text{N}_{12}$<br>[ $2(\text{C}_{42}\text{H}_{50}\text{BCuN}_6)$ , $3(\text{CH}_2\text{C}_{12})$ ] |                                |
| Formula weight                       | 1681.26                                                                                                                                                          |                                |
| Temperature                          | 173(2) K                                                                                                                                                         |                                |
| Wavelength                           | 0.71073 Å                                                                                                                                                        |                                |
| Crystal system                       | Triclinic                                                                                                                                                        |                                |
| Space group                          | $\text{P}\bar{1}$                                                                                                                                                |                                |
| Unit cell dimensions                 | $a = 11.1908(5)$ Å                                                                                                                                               | $\alpha = 77.7080(9)^\circ$ .  |
|                                      | $b = 12.0506(5)$ Å                                                                                                                                               | $\beta = 83.1730(10)^\circ$ .  |
|                                      | $c = 16.6731(7)$ Å                                                                                                                                               | $\gamma = 89.2120(10)^\circ$ . |
| Volume                               | $2181.19(16)$ Å <sup>3</sup>                                                                                                                                     |                                |
| Z                                    | 1                                                                                                                                                                |                                |
| Density (calculated)                 | 1.280 Mg/m <sup>3</sup>                                                                                                                                          |                                |
| Absorption coefficient               | 0.722 mm <sup>-1</sup>                                                                                                                                           |                                |
| F(000)                               | 882                                                                                                                                                              |                                |
| Crystal size                         | 0.50 x 0.48 x 0.45 mm <sup>3</sup>                                                                                                                               |                                |
| Theta range for data collection      | 1.73 to 30.53°.                                                                                                                                                  |                                |
| Index ranges                         | $-15 \leq h \leq 10$ , $-15 \leq k \leq 17$ , $-23 \leq l \leq 22$                                                                                               |                                |
| Reflections collected                | 51665                                                                                                                                                            |                                |
| Independent reflections              | 13139 [R(int) = 0.0266]                                                                                                                                          |                                |
| Completeness to theta = 30.53°       | 98.5 %                                                                                                                                                           |                                |
| Absorption correction                | Semi-empirical from equivalents                                                                                                                                  |                                |
| Max. and min. transmission           | 0.7371 and 0.7142                                                                                                                                                |                                |
| Refinement method                    | Full-matrix least-squares on F <sup>2</sup>                                                                                                                      |                                |
| Data / restraints / parameters       | 13139 / 1 / 509                                                                                                                                                  |                                |
| Goodness-of-fit on F <sup>2</sup>    | 1.052                                                                                                                                                            |                                |
| Final R indices [ $I > 2\sigma(I)$ ] | R1 = 0.0481, wR2 = 0.1287                                                                                                                                        |                                |
| R indices (all data)                 | R1 = 0.0664, wR2 = 0.1437                                                                                                                                        |                                |
| Largest diff. peak and hole          | 1.055 and -1.047 e.Å <sup>-3</sup>                                                                                                                               |                                |

Table 2. Atomic coordinates ( $\times 10^4$ ) and equivalent isotropic displacement parameters ( $\text{\AA}^2 \times 10^3$ ) for ea18410a.  $U(\text{eq})$  is defined as one third of the trace of the orthogonalized  $U^{ij}$  tensor.

|       | x        | y       | z        | U(eq) |
|-------|----------|---------|----------|-------|
| Cu(1) | 1159(1)  | 2628(1) | 7345(1)  | 25(1) |
| N(1)  | 1059(1)  | 4234(1) | 6724(1)  | 23(1) |
| N(2)  | 1851(1)  | 4547(1) | 6024(1)  | 23(1) |
| N(3)  | 3042(1)  | 2606(1) | 7193(1)  | 24(1) |
| N(4)  | 3539(1)  | 3226(1) | 6446(1)  | 25(1) |
| N(5)  | 1299(1)  | 2038(1) | 6169(1)  | 25(1) |
| N(6)  | 2086(1)  | 2682(1) | 5565(1)  | 24(1) |
| C(1)  | 328(2)   | 5119(2) | 6767(1)  | 24(1) |
| C(2)  | 654(2)   | 6013(2) | 6089(1)  | 31(1) |
| C(3)  | 1617(2)  | 5610(2) | 5641(1)  | 28(1) |
| C(4)  | -657(2)  | 5027(1) | 7459(1)  | 23(1) |
| C(5)  | -406(2)  | 5107(2) | 8248(1)  | 26(1) |
| C(6)  | -1338(2) | 4933(2) | 8896(1)  | 30(1) |
| C(7)  | -2499(2) | 4673(2) | 8786(1)  | 33(1) |
| C(8)  | -2740(2) | 4622(2) | 7997(1)  | 32(1) |
| C(9)  | -1838(2) | 4805(2) | 7326(1)  | 27(1) |
| C(10) | 849(2)   | 5362(2) | 8402(1)  | 35(1) |
| C(11) | -3484(2) | 4469(3) | 9506(2)  | 53(1) |
| C(12) | -2142(2) | 4750(2) | 6477(1)  | 38(1) |
| C(13) | 3960(2)  | 2209(2) | 7616(1)  | 27(1) |
| C(14) | 5056(2)  | 2583(2) | 7145(1)  | 37(1) |
| C(15) | 4753(2)  | 3217(2) | 6409(1)  | 32(1) |
| C(16) | 3767(2)  | 1428(2) | 8440(1)  | 28(1) |
| C(17) | 3885(2)  | 253(2)  | 8491(1)  | 34(1) |
| C(18) | 3719(2)  | -475(2) | 9263(2)  | 40(1) |
| C(19) | 3439(2)  | -81(2)  | 9983(2)  | 40(1) |
| C(20) | 3343(2)  | 1084(2) | 9920(1)  | 40(1) |
| C(21) | 3508(2)  | 1846(2) | 9159(1)  | 33(1) |
| C(22) | 4166(3)  | -218(2) | 7723(2)  | 51(1) |
| C(23) | 3241(2)  | -889(3) | 10815(2) | 56(1) |
| C(24) | 3423(3)  | 3107(2) | 9116(2)  | 48(1) |
| C(25) | 921(2)   | 1195(2) | 5852(1)  | 25(1) |
| C(26) | 1466(2)  | 1295(2) | 5036(1)  | 33(1) |



|       |          |          |         |         |
|-------|----------|----------|---------|---------|
| C(27) | 2194(2)  | 2243(2)  | 4884(1) | 30(1)   |
| C(28) | 26(2)    | 338(2)   | 6337(1) | 25(1)   |
| C(29) | -1177(2) | 644(2)   | 6485(1) | 29(1)   |
| C(30) | -2017(2) | -177(2)  | 6923(1) | 32(1)   |
| C(31) | -1696(2) | -1291(2) | 7215(1) | 31(1)   |
| C(32) | -499(2)  | -1581(2) | 7064(1) | 31(1)   |
| C(33) | 370(2)   | -788(2)  | 6626(1) | 29(1)   |
| C(34) | -1576(2) | 1840(2)  | 6187(2) | 47(1)   |
| C(35) | -2624(2) | -2167(2) | 7675(2) | 45(1)   |
| C(36) | 1652(2)  | -1157(2) | 6472(2) | 46(1)   |
| C(37) | -290(2)  | 2229(2)  | 8172(1) | 36(1)   |
| C(38) | 352(2)   | 1403(2)  | 8255(1) | 27(1)   |
| C(39) | 853(2)   | 270(2)   | 8545(1) | 34(1)   |
| C(40) | -101(2)  | -597(2)  | 9003(1) | 30(1)   |
| C(41) | 471(2)   | -1737(2) | 9334(2) | 43(1)   |
| C(42) | -459(3)  | -2620(2) | 9778(2) | 50(1)   |
| B(1)  | 2761(2)  | 3690(2)  | 5745(1) | 24(1)   |
| Cl(1) | 4031(1)  | 6303(1)  | 7973(1) | 69(1)   |
| Cl(2) | 4647(1)  | 6445(1)  | 6206(1) | 99(1)   |
| C(43) | 3794(3)  | 5771(3)  | 7102(2) | 60(1)   |
| Cl(3) | 5315(2)  | 859(2)   | 5428(1) | 156(1)  |
| C(44) | 4680(17) | 258(14)  | 4557(7) | 201(10) |

---

Table 3. Bond lengths [Å] and angles [°] for  $\text{Tp}^{\text{Ms}}\text{Cu}(\text{1-hexyne})$ , **1**.

|              |            |              |          |
|--------------|------------|--------------|----------|
| Cu(1)-C(37)  | 1.991(2)   | C(11)-H(11A) | 0.9800   |
| Cu(1)-N(1)   | 2.0002(15) | C(11)-H(11B) | 0.9800   |
| Cu(1)-C(38)  | 2.0127(18) | C(11)-H(11C) | 0.9800   |
| Cu(1)-N(3)   | 2.0930(15) | C(12)-H(12A) | 0.9800   |
| Cu(1)-N(5)   | 2.2124(15) | C(12)-H(12B) | 0.9800   |
| N(1)-C(1)    | 1.344(2)   | C(12)-H(12C) | 0.9800   |
| N(1)-N(2)    | 1.3654(19) | C(13)-C(14)  | 1.400(3) |
| N(2)-C(3)    | 1.341(2)   | C(13)-C(16)  | 1.485(3) |
| N(2)-B(1)    | 1.544(2)   | C(14)-C(15)  | 1.377(3) |
| N(3)-C(13)   | 1.340(2)   | C(14)-H(14)  | 0.9500   |
| N(3)-N(4)    | 1.368(2)   | C(15)-H(15)  | 0.9500   |
| N(4)-C(15)   | 1.352(2)   | C(16)-C(21)  | 1.394(3) |
| N(4)-B(1)    | 1.544(3)   | C(16)-C(17)  | 1.406(3) |
| N(5)-C(25)   | 1.336(2)   | C(17)-C(18)  | 1.390(3) |
| N(5)-N(6)    | 1.366(2)   | C(17)-C(22)  | 1.506(4) |
| N(6)-C(27)   | 1.345(2)   | C(18)-C(19)  | 1.383(4) |
| N(6)-B(1)    | 1.540(2)   | C(18)-H(18)  | 0.9500   |
| C(1)-C(2)    | 1.402(2)   | C(19)-C(20)  | 1.389(4) |
| C(1)-C(4)    | 1.486(2)   | C(19)-C(23)  | 1.509(3) |
| C(2)-C(3)    | 1.380(3)   | C(20)-C(21)  | 1.394(3) |
| C(2)-H(2)    | 0.9500     | C(20)-H(20)  | 0.9500   |
| C(3)-H(3)    | 0.9500     | C(21)-C(24)  | 1.507(3) |
| C(4)-C(5)    | 1.401(3)   | C(22)-H(22A) | 0.9800   |
| C(4)-C(9)    | 1.404(3)   | C(22)-H(22B) | 0.9800   |
| C(5)-C(6)    | 1.393(3)   | C(22)-H(22C) | 0.9800   |
| C(5)-C(10)   | 1.505(3)   | C(23)-H(23A) | 0.9800   |
| C(6)-C(7)    | 1.382(3)   | C(23)-H(23B) | 0.9800   |
| C(6)-H(6)    | 0.9500     | C(23)-H(23C) | 0.9800   |
| C(7)-C(8)    | 1.388(3)   | C(24)-H(24A) | 0.9800   |
| C(7)-C(11)   | 1.510(3)   | C(24)-H(24B) | 0.9800   |
| C(8)-C(9)    | 1.398(3)   | C(24)-H(24C) | 0.9800   |
| C(8)-H(8)    | 0.9500     | C(25)-C(26)  | 1.404(3) |
| C(9)-C(12)   | 1.508(3)   | C(25)-C(28)  | 1.484(2) |
| C(10)-H(10A) | 0.9800     | C(26)-C(27)  | 1.373(3) |
| C(10)-H(10B) | 0.9800     | C(26)-H(26)  | 0.9500   |
| C(10)-H(10C) | 0.9800     | C(27)-H(27)  | 0.9500   |

|              |           |                   |            |
|--------------|-----------|-------------------|------------|
| C(28)-C(29)  | 1.398(3)  | C(43)-H(43A)      | 0.9900     |
| C(28)-C(33)  | 1.404(3)  | C(43)-H(43B)      | 0.9900     |
| C(29)-C(30)  | 1.397(3)  | Cl(3)-C(44)#1     | 1.342(18)  |
| C(29)-C(34)  | 1.501(3)  | Cl(3)-C(44)       | 1.96(2)    |
| C(30)-C(31)  | 1.385(3)  | C(44)-Cl(3)#1     | 1.342(18)  |
| C(30)-H(30)  | 0.9500    | C(44)-H(44A)      | 0.9900     |
| C(31)-C(32)  | 1.387(3)  | C(44)-H(44B)      | 0.9900     |
| C(31)-C(35)  | 1.510(3)  |                   |            |
| C(32)-C(33)  | 1.397(3)  | C(37)-Cu(1)-N(1)  | 110.03(7)  |
| C(32)-H(32)  | 0.9500    | C(37)-Cu(1)-C(38) | 35.26(8)   |
| C(33)-C(36)  | 1.505(3)  | N(1)-Cu(1)-C(38)  | 145.24(7)  |
| C(34)-H(34A) | 0.9800    | C(37)-Cu(1)-N(3)  | 143.61(8)  |
| C(34)-H(34B) | 0.9800    | N(1)-Cu(1)-N(3)   | 94.42(6)   |
| C(34)-H(34C) | 0.9800    | C(38)-Cu(1)-N(3)  | 115.49(7)  |
| C(35)-H(35A) | 0.9800    | C(37)-Cu(1)-N(5)  | 120.00(8)  |
| C(35)-H(35B) | 0.9800    | N(1)-Cu(1)-N(5)   | 90.00(6)   |
| C(35)-H(35C) | 0.9800    | C(38)-Cu(1)-N(5)  | 108.81(7)  |
| C(36)-H(36A) | 0.9800    | N(3)-Cu(1)-N(5)   | 85.29(6)   |
| C(36)-H(36B) | 0.9800    | C(1)-N(1)-N(2)    | 106.94(14) |
| C(36)-H(36C) | 0.9800    | C(1)-N(1)-Cu(1)   | 136.58(12) |
| C(37)-C(38)  | 1.213(3)  | N(2)-N(1)-Cu(1)   | 116.21(11) |
| C(37)-H(37)  | 0.903(17) | C(3)-N(2)-N(1)    | 109.48(14) |
| C(38)-C(39)  | 1.474(3)  | C(3)-N(2)-B(1)    | 129.60(15) |
| C(39)-C(40)  | 1.520(3)  | N(1)-N(2)-B(1)    | 120.72(14) |
| C(39)-H(39A) | 0.9900    | C(13)-N(3)-N(4)   | 106.61(14) |
| C(39)-H(39B) | 0.9900    | C(13)-N(3)-Cu(1)  | 140.09(13) |
| C(40)-C(41)  | 1.528(3)  | N(4)-N(3)-Cu(1)   | 113.22(11) |
| C(40)-H(40A) | 0.9900    | C(15)-N(4)-N(3)   | 109.73(16) |
| C(40)-H(40B) | 0.9900    | C(15)-N(4)-B(1)   | 128.32(16) |
| C(41)-C(42)  | 1.509(3)  | N(3)-N(4)-B(1)    | 121.41(14) |
| C(41)-H(41A) | 0.9900    | C(25)-N(5)-N(6)   | 106.58(14) |
| C(41)-H(41B) | 0.9900    | C(25)-N(5)-Cu(1)  | 140.74(13) |
| C(42)-H(42A) | 0.9800    | N(6)-N(5)-Cu(1)   | 112.49(10) |
| C(42)-H(42B) | 0.9800    | C(27)-N(6)-N(5)   | 109.92(15) |
| C(42)-H(42C) | 0.9800    | C(27)-N(6)-B(1)   | 129.64(16) |
| B(1)-H(1)    | 1.0000    | N(5)-N(6)-B(1)    | 120.28(14) |
| Cl(1)-C(43)  | 1.756(3)  | N(1)-C(1)-C(2)    | 109.74(16) |
| Cl(2)-C(43)  | 1.722(3)  | N(1)-C(1)-C(4)    | 119.73(15) |

|                     |            |                     |            |
|---------------------|------------|---------------------|------------|
| C(2)-C(1)-C(4)      | 130.52(17) | C(9)-C(12)-H(12B)   | 109.5      |
| C(3)-C(2)-C(1)      | 104.86(17) | H(12A)-C(12)-H(12B) | 109.5      |
| C(3)-C(2)-H(2)      | 127.6      | C(9)-C(12)-H(12C)   | 109.5      |
| C(1)-C(2)-H(2)      | 127.6      | H(12A)-C(12)-H(12C) | 109.5      |
| N(2)-C(3)-C(2)      | 108.99(16) | H(12B)-C(12)-H(12C) | 109.5      |
| N(2)-C(3)-H(3)      | 125.5      | N(3)-C(13)-C(14)    | 110.05(17) |
| C(2)-C(3)-H(3)      | 125.5      | N(3)-C(13)-C(16)    | 121.99(16) |
| C(5)-C(4)-C(9)      | 120.04(16) | C(14)-C(13)-C(16)   | 127.84(17) |
| C(5)-C(4)-C(1)      | 120.48(16) | C(15)-C(14)-C(13)   | 105.37(17) |
| C(9)-C(4)-C(1)      | 119.41(16) | C(15)-C(14)-H(14)   | 127.3      |
| C(6)-C(5)-C(4)      | 118.91(17) | C(13)-C(14)-H(14)   | 127.3      |
| C(6)-C(5)-C(10)     | 120.11(17) | N(4)-C(15)-C(14)    | 108.23(17) |
| C(4)-C(5)-C(10)     | 120.97(16) | N(4)-C(15)-H(15)    | 125.9      |
| C(7)-C(6)-C(5)      | 122.06(18) | C(14)-C(15)-H(15)   | 125.9      |
| C(7)-C(6)-H(6)      | 119.0      | C(21)-C(16)-C(17)   | 120.03(19) |
| C(5)-C(6)-H(6)      | 119.0      | C(21)-C(16)-C(13)   | 121.03(18) |
| C(6)-C(7)-C(8)      | 118.37(18) | C(17)-C(16)-C(13)   | 118.92(18) |
| C(6)-C(7)-C(11)     | 120.7(2)   | C(18)-C(17)-C(16)   | 118.8(2)   |
| C(8)-C(7)-C(11)     | 120.9(2)   | C(18)-C(17)-C(22)   | 120.2(2)   |
| C(7)-C(8)-C(9)      | 121.60(18) | C(16)-C(17)-C(22)   | 121.0(2)   |
| C(7)-C(8)-H(8)      | 119.2      | C(19)-C(18)-C(17)   | 122.1(2)   |
| C(9)-C(8)-H(8)      | 119.2      | C(19)-C(18)-H(18)   | 118.9      |
| C(8)-C(9)-C(4)      | 118.95(18) | C(17)-C(18)-H(18)   | 118.9      |
| C(8)-C(9)-C(12)     | 119.84(18) | C(18)-C(19)-C(20)   | 118.1(2)   |
| C(4)-C(9)-C(12)     | 121.21(18) | C(18)-C(19)-C(23)   | 121.2(2)   |
| C(5)-C(10)-H(10A)   | 109.5      | C(20)-C(19)-C(23)   | 120.7(3)   |
| C(5)-C(10)-H(10B)   | 109.5      | C(19)-C(20)-C(21)   | 121.8(2)   |
| H(10A)-C(10)-H(10B) | 109.5      | C(19)-C(20)-H(20)   | 119.1      |
| C(5)-C(10)-H(10C)   | 109.5      | C(21)-C(20)-H(20)   | 119.1      |
| H(10A)-C(10)-H(10C) | 109.5      | C(20)-C(21)-C(16)   | 119.1(2)   |
| H(10B)-C(10)-H(10C) | 109.5      | C(20)-C(21)-C(24)   | 120.3(2)   |
| C(7)-C(11)-H(11A)   | 109.5      | C(16)-C(21)-C(24)   | 120.55(19) |
| C(7)-C(11)-H(11B)   | 109.5      | C(17)-C(22)-H(22A)  | 109.5      |
| H(11A)-C(11)-H(11B) | 109.5      | C(17)-C(22)-H(22B)  | 109.5      |
| C(7)-C(11)-H(11C)   | 109.5      | H(22A)-C(22)-H(22B) | 109.5      |
| H(11A)-C(11)-H(11C) | 109.5      | C(17)-C(22)-H(22C)  | 109.5      |
| H(11B)-C(11)-H(11C) | 109.5      | H(22A)-C(22)-H(22C) | 109.5      |
| C(9)-C(12)-H(12A)   | 109.5      | H(22B)-C(22)-H(22C) | 109.5      |

|                     |            |                     |            |
|---------------------|------------|---------------------|------------|
| C(19)-C(23)-H(23A)  | 109.5      | C(28)-C(33)-C(36)   | 121.42(18) |
| C(19)-C(23)-H(23B)  | 109.5      | C(29)-C(34)-H(34A)  | 109.5      |
| H(23A)-C(23)-H(23B) | 109.5      | C(29)-C(34)-H(34B)  | 109.5      |
| C(19)-C(23)-H(23C)  | 109.5      | H(34A)-C(34)-H(34B) | 109.5      |
| H(23A)-C(23)-H(23C) | 109.5      | C(29)-C(34)-H(34C)  | 109.5      |
| H(23B)-C(23)-H(23C) | 109.5      | H(34A)-C(34)-H(34C) | 109.5      |
| C(21)-C(24)-H(24A)  | 109.5      | H(34B)-C(34)-H(34C) | 109.5      |
| C(21)-C(24)-H(24B)  | 109.5      | C(31)-C(35)-H(35A)  | 109.5      |
| H(24A)-C(24)-H(24B) | 109.5      | C(31)-C(35)-H(35B)  | 109.5      |
| C(21)-C(24)-H(24C)  | 109.5      | H(35A)-C(35)-H(35B) | 109.5      |
| H(24A)-C(24)-H(24C) | 109.5      | C(31)-C(35)-H(35C)  | 109.5      |
| H(24B)-C(24)-H(24C) | 109.5      | H(35A)-C(35)-H(35C) | 109.5      |
| N(5)-C(25)-C(26)    | 109.94(16) | H(35B)-C(35)-H(35C) | 109.5      |
| N(5)-C(25)-C(28)    | 121.27(16) | C(33)-C(36)-H(36A)  | 109.5      |
| C(26)-C(25)-C(28)   | 128.77(16) | C(33)-C(36)-H(36B)  | 109.5      |
| C(27)-C(26)-C(25)   | 105.17(16) | H(36A)-C(36)-H(36B) | 109.5      |
| C(27)-C(26)-H(26)   | 127.4      | C(33)-C(36)-H(36C)  | 109.5      |
| C(25)-C(26)-H(26)   | 127.4      | H(36A)-C(36)-H(36C) | 109.5      |
| N(6)-C(27)-C(26)    | 108.39(17) | H(36B)-C(36)-H(36C) | 109.5      |
| N(6)-C(27)-H(27)    | 125.8      | C(38)-C(37)-Cu(1)   | 73.33(13)  |
| C(26)-C(27)-H(27)   | 125.8      | C(38)-C(37)-H(37)   | 162.3(18)  |
| C(29)-C(28)-C(33)   | 119.66(17) | Cu(1)-C(37)-H(37)   | 124.2(18)  |
| C(29)-C(28)-C(25)   | 119.78(17) | C(37)-C(38)-C(39)   | 163.5(2)   |
| C(33)-C(28)-C(25)   | 120.53(17) | C(37)-C(38)-Cu(1)   | 71.42(13)  |
| C(30)-C(29)-C(28)   | 119.34(18) | C(39)-C(38)-Cu(1)   | 125.04(14) |
| C(30)-C(29)-C(34)   | 119.55(18) | C(38)-C(39)-C(40)   | 112.86(17) |
| C(28)-C(29)-C(34)   | 121.12(18) | C(38)-C(39)-H(39A)  | 109.0      |
| C(31)-C(30)-C(29)   | 121.88(19) | C(40)-C(39)-H(39A)  | 109.0      |
| C(31)-C(30)-H(30)   | 119.1      | C(38)-C(39)-H(39B)  | 109.0      |
| C(29)-C(30)-H(30)   | 119.1      | C(40)-C(39)-H(39B)  | 109.0      |
| C(30)-C(31)-C(32)   | 118.10(18) | H(39A)-C(39)-H(39B) | 107.8      |
| C(30)-C(31)-C(35)   | 120.9(2)   | C(39)-C(40)-C(41)   | 110.86(18) |
| C(32)-C(31)-C(35)   | 121.0(2)   | C(39)-C(40)-H(40A)  | 109.5      |
| C(31)-C(32)-C(33)   | 121.87(18) | C(41)-C(40)-H(40A)  | 109.5      |
| C(31)-C(32)-H(32)   | 119.1      | C(39)-C(40)-H(40B)  | 109.5      |
| C(33)-C(32)-H(32)   | 119.1      | C(41)-C(40)-H(40B)  | 109.5      |
| C(32)-C(33)-C(28)   | 119.14(18) | H(40A)-C(40)-H(40B) | 108.1      |
| C(32)-C(33)-C(36)   | 119.43(18) | C(42)-C(41)-C(40)   | 111.9(2)   |

|                      |            |
|----------------------|------------|
| C(42)-C(41)-H(41A)   | 109.2      |
| C(40)-C(41)-H(41A)   | 109.2      |
| C(42)-C(41)-H(41B)   | 109.2      |
| C(40)-C(41)-H(41B)   | 109.2      |
| H(41A)-C(41)-H(41B)  | 107.9      |
| C(41)-C(42)-H(42A)   | 109.5      |
| C(41)-C(42)-H(42B)   | 109.5      |
| H(42A)-C(42)-H(42B)  | 109.5      |
| C(41)-C(42)-H(42C)   | 109.5      |
| H(42A)-C(42)-H(42C)  | 109.5      |
| H(42B)-C(42)-H(42C)  | 109.5      |
| N(6)-B(1)-N(2)       | 109.88(14) |
| N(6)-B(1)-N(4)       | 108.15(15) |
| N(2)-B(1)-N(4)       | 109.43(14) |
| N(6)-B(1)-H(1)       | 109.8      |
| N(2)-B(1)-H(1)       | 109.8      |
| N(4)-B(1)-H(1)       | 109.8      |
| Cl(2)-C(43)-Cl(1)    | 113.79(16) |
| Cl(2)-C(43)-H(43A)   | 108.8      |
| Cl(1)-C(43)-H(43A)   | 108.8      |
| Cl(2)-C(43)-H(43B)   | 108.8      |
| Cl(1)-C(43)-H(43B)   | 108.8      |
| H(43A)-C(43)-H(43B)  | 107.7      |
| C(44)#1-Cl(3)-C(44)  | 58.9(8)    |
| Cl(3)#1-C(44)-Cl(3)  | 121.1(8)   |
| Cl(3)#1-C(44)-H(44A) | 107.1      |
| Cl(3)-C(44)-H(44A)   | 107.1      |
| Cl(3)#1-C(44)-H(44B) | 107.1      |
| Cl(3)-C(44)-H(44B)   | 107.1      |
| H(44A)-C(44)-H(44B)  | 106.8      |

---

Symmetry transformations used to generate equivalent atoms:

#1 -x+1,-y,-z+1

Table 4. Anisotropic displacement parameters ( $\text{\AA}^2 \times 10^3$ ) for  $\text{Tp}^{\text{Ms}}\text{Cu(1-hexyne)}$ , **1**. The anisotropic displacement factor exponent takes the form:  $-2\pi^2 [ h^2 a^{*2} U^{11} + \dots + 2 h k a^* b^* U^{12} ]$

|       | $U^{11}$ | $U^{22}$ | $U^{33}$ | $U^{23}$ | $U^{13}$ | $U^{12}$ |
|-------|----------|----------|----------|----------|----------|----------|
| Cu(1) | 25(1)    | 23(1)    | 24(1)    | 0(1)     | 5(1)     | -1(1)    |
| N(1)  | 24(1)    | 23(1)    | 20(1)    | -4(1)    | 3(1)     | -1(1)    |
| N(2)  | 27(1)    | 22(1)    | 19(1)    | -3(1)    | 3(1)     | -3(1)    |
| N(3)  | 21(1)    | 25(1)    | 25(1)    | -3(1)    | 1(1)     | -3(1)    |
| N(4)  | 22(1)    | 26(1)    | 25(1)    | -6(1)    | 3(1)     | -4(1)    |
| N(5)  | 27(1)    | 24(1)    | 23(1)    | -7(1)    | 3(1)     | -7(1)    |
| N(6)  | 26(1)    | 24(1)    | 23(1)    | -7(1)    | 3(1)     | -4(1)    |
| C(1)  | 28(1)    | 22(1)    | 21(1)    | -4(1)    | -1(1)    | 1(1)     |
| C(2)  | 44(1)    | 22(1)    | 24(1)    | 0(1)     | 1(1)     | 3(1)     |
| C(3)  | 39(1)    | 21(1)    | 22(1)    | -2(1)    | 2(1)     | -3(1)    |
| C(4)  | 27(1)    | 19(1)    | 22(1)    | -4(1)    | -1(1)    | 3(1)     |
| C(5)  | 27(1)    | 25(1)    | 25(1)    | -6(1)    | -2(1)    | 2(1)     |
| C(6)  | 35(1)    | 31(1)    | 24(1)    | -8(1)    | 0(1)     | 2(1)     |
| C(7)  | 32(1)    | 33(1)    | 34(1)    | -10(1)   | 8(1)     | -2(1)    |
| C(8)  | 26(1)    | 32(1)    | 38(1)    | -10(1)   | -1(1)    | -2(1)    |
| C(9)  | 29(1)    | 22(1)    | 29(1)    | -7(1)    | -4(1)    | 2(1)     |
| C(10) | 30(1)    | 47(1)    | 30(1)    | -10(1)   | -5(1)    | 0(1)     |
| C(11) | 43(1)    | 67(2)    | 47(1)    | -20(1)   | 20(1)    | -11(1)   |
| C(12) | 45(1)    | 37(1)    | 34(1)    | -9(1)    | -14(1)   | -2(1)    |
| C(13) | 21(1)    | 28(1)    | 32(1)    | -6(1)    | -2(1)    | -1(1)    |
| C(14) | 20(1)    | 44(1)    | 42(1)    | -3(1)    | -1(1)    | -4(1)    |
| C(15) | 21(1)    | 38(1)    | 35(1)    | -8(1)    | 4(1)     | -5(1)    |
| C(16) | 19(1)    | 32(1)    | 32(1)    | -2(1)    | -6(1)    | -1(1)    |
| C(17) | 25(1)    | 33(1)    | 43(1)    | -4(1)    | -7(1)    | 1(1)     |
| C(18) | 28(1)    | 32(1)    | 55(1)    | 4(1)     | -9(1)    | 3(1)     |
| C(19) | 22(1)    | 49(1)    | 42(1)    | 10(1)    | -10(1)   | -1(1)    |
| C(20) | 31(1)    | 53(1)    | 33(1)    | -2(1)    | -7(1)    | -3(1)    |
| C(21) | 25(1)    | 37(1)    | 35(1)    | -5(1)    | -5(1)    | -2(1)    |
| C(22) | 51(1)    | 40(1)    | 61(2)    | -16(1)   | 1(1)     | 2(1)     |
| C(23) | 35(1)    | 68(2)    | 49(1)    | 23(1)    | -11(1)   | -3(1)    |
| C(24) | 57(2)    | 39(1)    | 46(1)    | -12(1)   | 2(1)     | -7(1)    |
| C(25) | 26(1)    | 23(1)    | 28(1)    | -9(1)    | -2(1)    | -1(1)    |
| C(26) | 39(1)    | 33(1)    | 30(1)    | -16(1)   | 1(1)     | -6(1)    |



|       |         |         |        |        |        |         |
|-------|---------|---------|--------|--------|--------|---------|
| C(27) | 35(1)   | 32(1)   | 24(1)  | -10(1) | 2(1)   | -3(1)   |
| C(28) | 28(1)   | 22(1)   | 28(1)  | -10(1) | -3(1)  | -3(1)   |
| C(29) | 29(1)   | 23(1)   | 35(1)  | -7(1)  | -2(1)  | -1(1)   |
| C(30) | 29(1)   | 30(1)   | 37(1)  | -8(1)  | 1(1)   | -2(1)   |
| C(31) | 37(1)   | 27(1)   | 30(1)  | -7(1)  | 0(1)   | -7(1)   |
| C(32) | 39(1)   | 23(1)   | 33(1)  | -6(1)  | -7(1)  | -1(1)   |
| C(33) | 30(1)   | 25(1)   | 34(1)  | -10(1) | -6(1)  | 1(1)    |
| C(34) | 35(1)   | 27(1)   | 74(2)  | -1(1)  | -1(1)  | 4(1)    |
| C(35) | 48(1)   | 35(1)   | 48(1)  | -4(1)  | 7(1)   | -13(1)  |
| C(36) | 34(1)   | 33(1)   | 70(2)  | -11(1) | -5(1)  | 4(1)    |
| C(37) | 30(1)   | 29(1)   | 42(1)  | 1(1)   | 12(1)  | -1(1)   |
| C(38) | 27(1)   | 27(1)   | 25(1)  | -1(1)  | 3(1)   | -4(1)   |
| C(39) | 32(1)   | 28(1)   | 36(1)  | 3(1)   | 3(1)   | 3(1)    |
| C(40) | 32(1)   | 24(1)   | 31(1)  | -1(1)  | -1(1)  | -2(1)   |
| C(41) | 44(1)   | 29(1)   | 50(1)  | 3(1)   | -2(1)  | 3(1)    |
| C(42) | 59(2)   | 30(1)   | 55(2)  | 5(1)   | -7(1)  | -5(1)   |
| B(1)  | 25(1)   | 22(1)   | 23(1)  | -6(1)  | 3(1)   | -4(1)   |
| Cl(1) | 71(1)   | 68(1)   | 76(1)  | -32(1) | -10(1) | -16(1)  |
| Cl(2) | 79(1)   | 131(1)  | 73(1)  | -7(1)  | 21(1)  | -47(1)  |
| C(43) | 61(2)   | 61(2)   | 60(2)  | -25(1) | 13(1)  | -22(1)  |
| Cl(3) | 258(3)  | 120(1)  | 104(1) | -39(1) | -51(1) | -26(1)  |
| C(44) | 270(20) | 183(14) | 95(8)  | 45(9)  | 60(10) | 154(14) |

---

Table 5. Hydrogen coordinates ( $\times 10^4$ ) and isotropic displacement parameters ( $\text{\AA}^2 \times 10^{-3}$ ) for  $\text{Tp}^{\text{Ms}}\text{Cu}(1\text{-hexyne})$ , **1**.

|        | x     | y     | z     | U(eq) |
|--------|-------|-------|-------|-------|
| H(2)   | 291   | 6737  | 5965  | 37    |
| H(3)   | 2046  | 6020  | 5142  | 34    |
| H(6)   | -1171 | 4996  | 9430  | 36    |
| H(8)   | -3537 | 4459  | 7911  | 39    |
| H(10A) | 856   | 5365  | 8989  | 53    |
| H(10B) | 1110  | 6109  | 8068  | 53    |
| H(10C) | 1397  | 4780  | 8251  | 53    |
| H(11A) | -4114 | 5036  | 9399  | 80    |
| H(11B) | -3148 | 4531  | 10011 | 80    |
| H(11C) | -3830 | 3707  | 9574  | 80    |
| H(12A) | -2994 | 4549  | 6511  | 57    |
| H(12B) | -1646 | 4174  | 6266  | 57    |
| H(12C) | -1982 | 5492  | 6103  | 57    |
| H(14)  | 5841  | 2431  | 7300  | 44    |
| H(15)  | 5303  | 3584  | 5955  | 38    |
| H(18)  | 3800  | -1269 | 9298  | 48    |
| H(20)  | 3160  | 1368  | 10410 | 48    |
| H(22A) | 3645  | 136   | 7310  | 76    |
| H(22B) | 4026  | -1041 | 7861  | 76    |
| H(22C) | 5010  | -55   | 7499  | 76    |
| H(23A) | 2756  | -1541 | 10774 | 83    |
| H(23B) | 2819  | -497  | 11222 | 83    |
| H(23C) | 4020  | -1154 | 10990 | 83    |
| H(24A) | 4139  | 3489  | 8782  | 71    |
| H(24B) | 3370  | 3252  | 9675  | 71    |
| H(24C) | 2703  | 3398  | 8862  | 71    |
| H(26)  | 1356  | 811   | 4669  | 39    |
| H(27)  | 2690  | 2538  | 4382  | 36    |
| H(30)  | -2833 | 35    | 7024  | 39    |
| H(32)  | -263  | -2340 | 7264  | 38    |
| H(34A) | -1321 | 2323  | 6541  | 71    |
| H(34B) | -2455 | 1852  | 6209  | 71    |

|        |          |          |          |     |
|--------|----------|----------|----------|-----|
| H(34C) | -1214    | 2124     | 5616     | 71  |
| H(35A) | -3175    | -1832    | 8058     | 68  |
| H(35B) | -2220    | -2817    | 7987     | 68  |
| H(35C) | -3079    | -2423    | 7279     | 68  |
| H(36A) | 1771     | -1882    | 6849     | 68  |
| H(36B) | 2198     | -581     | 6567     | 68  |
| H(36C) | 1823     | -1248    | 5899     | 68  |
| H(37)  | -890(20) | 2710(20) | 8252(17) | 43  |
| H(39A) | 1465     | 333      | 8915     | 40  |
| H(39B) | 1260     | -1       | 8063     | 40  |
| H(40A) | -687     | -703     | 8624     | 36  |
| H(40B) | -540     | -313     | 9468     | 36  |
| H(41A) | 925      | -2010    | 8868     | 52  |
| H(41B) | 1048     | -1630    | 9719     | 52  |
| H(42A) | -929     | -2342    | 10228    | 74  |
| H(42B) | -56      | -3324    | 10006    | 74  |
| H(42C) | -997     | -2768    | 9389     | 74  |
| H(1)   | 3288     | 4072     | 5237     | 28  |
| H(43A) | 3981     | 4952     | 7208     | 72  |
| H(43B) | 2932     | 5850     | 7021     | 72  |
| H(44A) | 3835     | 508      | 4544     | 242 |
| H(44B) | 5131     | 640      | 4025     | 242 |

---

Table 6. Torsion angles [°] for  $\text{Tp}^{\text{Ms}}\text{Cu}(1\text{-hexyne})$ , **1**.

---

|                        |             |
|------------------------|-------------|
| C(37)-Cu(1)-N(1)-C(1)  | 6.7(2)      |
| C(38)-Cu(1)-N(1)-C(1)  | 4.4(3)      |
| N(3)-Cu(1)-N(1)-C(1)   | -145.91(18) |
| N(5)-Cu(1)-N(1)-C(1)   | 128.81(18)  |
| C(37)-Cu(1)-N(1)-N(2)  | -166.42(13) |
| C(38)-Cu(1)-N(1)-N(2)  | -168.71(13) |
| N(3)-Cu(1)-N(1)-N(2)   | 41.01(13)   |
| N(5)-Cu(1)-N(1)-N(2)   | -44.26(12)  |
| C(1)-N(1)-N(2)-C(3)    | 0.2(2)      |
| Cu(1)-N(1)-N(2)-C(3)   | 175.22(12)  |
| C(1)-N(1)-N(2)-B(1)    | -175.05(15) |
| Cu(1)-N(1)-N(2)-B(1)   | 0.0(2)      |
| C(37)-Cu(1)-N(3)-C(13) | 7.4(3)      |
| N(1)-Cu(1)-N(3)-C(13)  | 140.5(2)    |
| C(38)-Cu(1)-N(3)-C(13) | -21.2(2)    |
| N(5)-Cu(1)-N(3)-C(13)  | -129.8(2)   |
| C(37)-Cu(1)-N(3)-N(4)  | -168.55(14) |
| N(1)-Cu(1)-N(3)-N(4)   | -35.40(12)  |
| C(38)-Cu(1)-N(3)-N(4)  | 162.85(12)  |
| N(5)-Cu(1)-N(3)-N(4)   | 54.23(12)   |
| C(13)-N(3)-N(4)-C(15)  | -0.2(2)     |
| Cu(1)-N(3)-N(4)-C(15)  | 177.04(12)  |
| C(13)-N(3)-N(4)-B(1)   | 172.00(16)  |
| Cu(1)-N(3)-N(4)-B(1)   | -10.7(2)    |
| C(37)-Cu(1)-N(5)-C(25) | -27.7(2)    |
| N(1)-Cu(1)-N(5)-C(25)  | -141.0(2)   |
| C(38)-Cu(1)-N(5)-C(25) | 9.2(2)      |
| N(3)-Cu(1)-N(5)-C(25)  | 124.5(2)    |
| C(37)-Cu(1)-N(5)-N(6)  | 158.17(12)  |
| N(1)-Cu(1)-N(5)-N(6)   | 44.88(12)   |
| C(38)-Cu(1)-N(5)-N(6)  | -164.91(12) |
| N(3)-Cu(1)-N(5)-N(6)   | -49.56(12)  |
| C(25)-N(5)-N(6)-C(27)  | -0.1(2)     |
| Cu(1)-N(5)-N(6)-C(27)  | 176.02(13)  |
| C(25)-N(5)-N(6)-B(1)   | -175.93(16) |
| Cu(1)-N(5)-N(6)-B(1)   | 0.2(2)      |

|                         |             |
|-------------------------|-------------|
| N(2)-N(1)-C(1)-C(2)     | -0.1(2)     |
| Cu(1)-N(1)-C(1)-C(2)    | -173.62(14) |
| N(2)-N(1)-C(1)-C(4)     | 178.70(15)  |
| Cu(1)-N(1)-C(1)-C(4)    | 5.2(3)      |
| N(1)-C(1)-C(2)-C(3)     | 0.0(2)      |
| C(4)-C(1)-C(2)-C(3)     | -178.64(19) |
| N(1)-N(2)-C(3)-C(2)     | -0.2(2)     |
| B(1)-N(2)-C(3)-C(2)     | 174.50(18)  |
| C(1)-C(2)-C(3)-N(2)     | 0.1(2)      |
| N(1)-C(1)-C(4)-C(5)     | 76.5(2)     |
| C(2)-C(1)-C(4)-C(5)     | -105.0(2)   |
| N(1)-C(1)-C(4)-C(9)     | -100.4(2)   |
| C(2)-C(1)-C(4)-C(9)     | 78.1(3)     |
| C(9)-C(4)-C(5)-C(6)     | 1.6(3)      |
| C(1)-C(4)-C(5)-C(6)     | -175.31(16) |
| C(9)-C(4)-C(5)-C(10)    | -179.03(17) |
| C(1)-C(4)-C(5)-C(10)    | 4.0(3)      |
| C(4)-C(5)-C(6)-C(7)     | 0.8(3)      |
| C(10)-C(5)-C(6)-C(7)    | -178.60(19) |
| C(5)-C(6)-C(7)-C(8)     | -2.2(3)     |
| C(5)-C(6)-C(7)-C(11)    | 178.9(2)    |
| C(6)-C(7)-C(8)-C(9)     | 1.2(3)      |
| C(11)-C(7)-C(8)-C(9)    | -179.8(2)   |
| C(7)-C(8)-C(9)-C(4)     | 1.0(3)      |
| C(7)-C(8)-C(9)-C(12)    | -179.55(19) |
| C(5)-C(4)-C(9)-C(8)     | -2.5(3)     |
| C(1)-C(4)-C(9)-C(8)     | 174.47(17)  |
| C(5)-C(4)-C(9)-C(12)    | 178.12(18)  |
| C(1)-C(4)-C(9)-C(12)    | -4.9(3)     |
| N(4)-N(3)-C(13)-C(14)   | 0.6(2)      |
| Cu(1)-N(3)-C(13)-C(14)  | -175.53(16) |
| N(4)-N(3)-C(13)-C(16)   | -175.82(17) |
| Cu(1)-N(3)-C(13)-C(16)  | 8.1(3)      |
| N(3)-C(13)-C(14)-C(15)  | -0.7(2)     |
| C(16)-C(13)-C(14)-C(15) | 175.4(2)    |
| N(3)-N(4)-C(15)-C(14)   | -0.2(2)     |
| B(1)-N(4)-C(15)-C(14)   | -171.74(18) |
| C(13)-C(14)-C(15)-N(4)  | 0.5(2)      |

|                         |             |
|-------------------------|-------------|
| N(3)-C(13)-C(16)-C(21)  | -85.0(2)    |
| C(14)-C(13)-C(16)-C(21) | 99.3(3)     |
| N(3)-C(13)-C(16)-C(17)  | 96.9(2)     |
| C(14)-C(13)-C(16)-C(17) | -78.8(3)    |
| C(21)-C(16)-C(17)-C(18) | 1.1(3)      |
| C(13)-C(16)-C(17)-C(18) | 179.21(18)  |
| C(21)-C(16)-C(17)-C(22) | -179.9(2)   |
| C(13)-C(16)-C(17)-C(22) | -1.8(3)     |
| C(16)-C(17)-C(18)-C(19) | 0.2(3)      |
| C(22)-C(17)-C(18)-C(19) | -178.9(2)   |
| C(17)-C(18)-C(19)-C(20) | -1.0(3)     |
| C(17)-C(18)-C(19)-C(23) | 178.9(2)    |
| C(18)-C(19)-C(20)-C(21) | 0.7(3)      |
| C(23)-C(19)-C(20)-C(21) | -179.3(2)   |
| C(19)-C(20)-C(21)-C(16) | 0.5(3)      |
| C(19)-C(20)-C(21)-C(24) | -178.7(2)   |
| C(17)-C(16)-C(21)-C(20) | -1.4(3)     |
| C(13)-C(16)-C(21)-C(20) | -179.51(18) |
| C(17)-C(16)-C(21)-C(24) | 177.8(2)    |
| C(13)-C(16)-C(21)-C(24) | -0.2(3)     |
| N(6)-N(5)-C(25)-C(26)   | 0.0(2)      |
| Cu(1)-N(5)-C(25)-C(26)  | -174.34(16) |
| N(6)-N(5)-C(25)-C(28)   | -178.59(16) |
| Cu(1)-N(5)-C(25)-C(28)  | 7.1(3)      |
| N(5)-C(25)-C(26)-C(27)  | 0.1(2)      |
| C(28)-C(25)-C(26)-C(27) | 178.55(19)  |
| N(5)-N(6)-C(27)-C(26)   | 0.2(2)      |
| B(1)-N(6)-C(27)-C(26)   | 175.52(19)  |
| C(25)-C(26)-C(27)-N(6)  | -0.2(2)     |
| N(5)-C(25)-C(28)-C(29)  | 72.2(2)     |
| C(26)-C(25)-C(28)-C(29) | -106.1(2)   |
| N(5)-C(25)-C(28)-C(33)  | -109.8(2)   |
| C(26)-C(25)-C(28)-C(33) | 72.0(3)     |
| C(33)-C(28)-C(29)-C(30) | 0.3(3)      |
| C(25)-C(28)-C(29)-C(30) | 178.32(18)  |
| C(33)-C(28)-C(29)-C(34) | 179.9(2)    |
| C(25)-C(28)-C(29)-C(34) | -2.0(3)     |
| C(28)-C(29)-C(30)-C(31) | -0.1(3)     |

|                         |             |
|-------------------------|-------------|
| C(34)-C(29)-C(30)-C(31) | -179.8(2)   |
| C(29)-C(30)-C(31)-C(32) | 0.2(3)      |
| C(29)-C(30)-C(31)-C(35) | -179.0(2)   |
| C(30)-C(31)-C(32)-C(33) | -0.5(3)     |
| C(35)-C(31)-C(32)-C(33) | 178.7(2)    |
| C(31)-C(32)-C(33)-C(28) | 0.6(3)      |
| C(31)-C(32)-C(33)-C(36) | -179.2(2)   |
| C(29)-C(28)-C(33)-C(32) | -0.5(3)     |
| C(25)-C(28)-C(33)-C(32) | -178.55(18) |
| C(29)-C(28)-C(33)-C(36) | 179.4(2)    |
| C(25)-C(28)-C(33)-C(36) | 1.3(3)      |
| N(1)-Cu(1)-C(37)-C(38)  | -177.74(13) |
| N(3)-Cu(1)-C(37)-C(38)  | -48.5(2)    |
| N(5)-Cu(1)-C(37)-C(38)  | 80.10(16)   |
| Cu(1)-C(37)-C(38)-C(39) | 179.0(7)    |
| N(1)-Cu(1)-C(38)-C(37)  | 3.7(2)      |
| N(3)-Cu(1)-C(38)-C(37)  | 150.52(15)  |
| N(5)-Cu(1)-C(38)-C(37)  | -115.68(15) |
| C(37)-Cu(1)-C(38)-C(39) | -179.7(3)   |
| N(1)-Cu(1)-C(38)-C(39)  | -175.94(15) |
| N(3)-Cu(1)-C(38)-C(39)  | -29.1(2)    |
| N(5)-Cu(1)-C(38)-C(39)  | 64.66(19)   |
| C(37)-C(38)-C(39)-C(40) | 21.5(9)     |
| Cu(1)-C(38)-C(39)-C(40) | -159.67(15) |
| C(38)-C(39)-C(40)-C(41) | -176.68(19) |
| C(39)-C(40)-C(41)-C(42) | -178.9(2)   |
| C(27)-N(6)-B(1)-N(2)    | 126.6(2)    |
| N(5)-N(6)-B(1)-N(2)     | -58.4(2)    |
| C(27)-N(6)-B(1)-N(4)    | -114.0(2)   |
| N(5)-N(6)-B(1)-N(4)     | 61.0(2)     |
| C(3)-N(2)-B(1)-N(6)     | -112.7(2)   |
| N(1)-N(2)-B(1)-N(6)     | 61.4(2)     |
| C(3)-N(2)-B(1)-N(4)     | 128.67(19)  |
| N(1)-N(2)-B(1)-N(4)     | -57.2(2)    |
| C(15)-N(4)-B(1)-N(6)    | 114.4(2)    |
| N(3)-N(4)-B(1)-N(6)     | -56.3(2)    |
| C(15)-N(4)-B(1)-N(2)    | -125.91(19) |
| N(3)-N(4)-B(1)-N(2)     | 63.4(2)     |

C(44)#1-Cl(3)-C(44)-Cl(3)#1

0.000(1)

---

Symmetry transformations used to generate equivalent atoms:

#1 -x+1,-y,-z+1



Table 1. Crystal data and structure refinement for  $\text{Tp}^{\text{Ms}}\text{Cu}(\text{phenylacetylene})$ , **2**.

|                                   |                                                                                                                  |                             |
|-----------------------------------|------------------------------------------------------------------------------------------------------------------|-----------------------------|
| Empirical formula                 | $\text{C}_{52}\text{H}_{52}\text{BCuN}_6$<br>[ $\text{C}_{44}\text{H}_{46}\text{BCuN}_6, \text{C}_8\text{H}_6$ ] |                             |
| Formula weight                    | 835.35                                                                                                           |                             |
| Temperature                       | 173(2) K                                                                                                         |                             |
| Wavelength                        | 0.71073 Å                                                                                                        |                             |
| Crystal system                    | Monoclinic                                                                                                       |                             |
| Space group                       | $\text{P2}_1/\text{n}$                                                                                           |                             |
| Unit cell dimensions              | $a = 9.1406(6)$ Å                                                                                                | $\alpha = 90^\circ$ .       |
|                                   | $b = 20.6632(15)$ Å                                                                                              | $\beta = 97.186(2)^\circ$ . |
|                                   | $c = 23.8733(17)$ Å                                                                                              | $\gamma = 90^\circ$ .       |
| Volume                            | $4473.6(5)$ Å <sup>3</sup>                                                                                       |                             |
| Z                                 | 4                                                                                                                |                             |
| Density (calculated)              | 1.240 Mg/m <sup>3</sup>                                                                                          |                             |
| Absorption coefficient            | 0.531 mm <sup>-1</sup>                                                                                           |                             |
| F(000)                            | 1760                                                                                                             |                             |
| Crystal size                      | 0.22 x 0.22 x 0.17 mm <sup>3</sup>                                                                               |                             |
| Theta range for data collection   | 1.31 to 30.53°.                                                                                                  |                             |
| Index ranges                      | $-12 \leq h \leq 8, -29 \leq k \leq 20, -34 \leq l \leq 31$                                                      |                             |
| Reflections collected             | 108788                                                                                                           |                             |
| Independent reflections           | 13516 [R(int) = 0.0652]                                                                                          |                             |
| Completeness to theta = 30.53°    | 99.4 %                                                                                                           |                             |
| Absorption correction             | Semi-empirical from equivalents                                                                                  |                             |
| Max. and min. transmission        | 0.9152 and 0.8922                                                                                                |                             |
| Refinement method                 | Full-matrix least-squares on F <sup>2</sup>                                                                      |                             |
| Data / restraints / parameters    | 13516 / 2 / 556                                                                                                  |                             |
| Goodness-of-fit on F <sup>2</sup> | 1.022                                                                                                            |                             |
| Final R indices [I > 2σ(I)]       | R1 = 0.0463, wR2 = 0.1001                                                                                        |                             |
| R indices (all data)              | R1 = 0.0769, wR2 = 0.1142                                                                                        |                             |
| Largest diff. peak and hole       | 0.335 and -0.664 e.Å <sup>-3</sup>                                                                               |                             |

Table 2. Atomic coordinates ( $\times 10^4$ ) and equivalent isotropic displacement parameters ( $\text{\AA}^2 \times 10^3$ ) for  $\text{Tp}^{\text{Ms}}\text{Cu}(\text{phenylacetylene})$ , **2**.  $U(\text{eq})$  is defined as one third of the trace of the orthogonalized  $U^{ij}$  tensor.

|       | x        | y       | z       | U(eq) |
|-------|----------|---------|---------|-------|
| Cu(1) | 7073(1)  | 1730(1) | 1632(1) | 27(1) |
| N(1)  | 6534(2)  | 808(1)  | 1420(1) | 23(1) |
| N(2)  | 5332(2)  | 565(1)  | 1636(1) | 22(1) |
| N(3)  | 6823(2)  | 1502(1) | 2530(1) | 23(1) |
| N(4)  | 5562(2)  | 1158(1) | 2568(1) | 23(1) |
| N(5)  | 4871(2)  | 2040(1) | 1557(1) | 23(1) |
| N(6)  | 3919(2)  | 1595(1) | 1737(1) | 23(1) |
| C(1)  | 7031(2)  | 338(1)  | 1104(1) | 21(1) |
| C(2)  | 6132(2)  | -210(1) | 1113(1) | 26(1) |
| C(3)  | 5087(2)  | -45(1)  | 1454(1) | 25(1) |
| C(4)  | 8386(2)  | 441(1)  | 833(1)  | 21(1) |
| C(5)  | 9758(2)  | 256(1)  | 1123(1) | 24(1) |
| C(6)  | 11037(2) | 427(1)  | 904(1)  | 28(1) |
| C(7)  | 11012(2) | 761(1)  | 399(1)  | 29(1) |
| C(8)  | 9644(2)  | 903(1)  | 100(1)  | 28(1) |
| C(9)  | 8334(2)  | 751(1)  | 307(1)  | 24(1) |
| C(10) | 9852(2)  | -135(1) | 1662(1) | 34(1) |
| C(11) | 12430(3) | 966(1)  | 190(1)  | 42(1) |
| C(12) | 6871(2)  | 924(1)  | -27(1)  | 36(1) |
| C(13) | 7425(2)  | 1617(1) | 3066(1) | 25(1) |
| C(14) | 6546(2)  | 1348(1) | 3445(1) | 32(1) |
| C(15) | 5381(2)  | 1066(1) | 3114(1) | 29(1) |
| C(16) | 8824(2)  | 1985(1) | 3191(1) | 26(1) |
| C(17) | 8849(2)  | 2567(1) | 3494(1) | 30(1) |
| C(18) | 10151(3) | 2923(1) | 3579(1) | 35(1) |
| C(19) | 11425(3) | 2718(1) | 3374(1) | 38(1) |
| C(20) | 11397(2) | 2128(1) | 3096(1) | 37(1) |
| C(21) | 10124(2) | 1752(1) | 3004(1) | 30(1) |
| C(22) | 7487(3)  | 2834(1) | 3710(1) | 42(1) |
| C(23) | 12802(3) | 3135(2) | 3440(1) | 58(1) |
| C(24) | 10159(3) | 1105(1) | 2716(1) | 39(1) |
| C(25) | 4046(2)  | 2555(1) | 1377(1) | 23(1) |

|       |          |         |         |       |
|-------|----------|---------|---------|-------|
| C(26) | 2568(2)  | 2442(1) | 1443(1) | 30(1) |
| C(27) | 2540(2)  | 1831(1) | 1670(1) | 27(1) |
| C(28) | 4705(2)  | 3152(1) | 1169(1) | 23(1) |
| C(29) | 5209(2)  | 3177(1) | 642(1)  | 27(1) |
| C(30) | 5777(2)  | 3759(1) | 463(1)  | 34(1) |
| C(31) | 5885(2)  | 4306(1) | 798(1)  | 34(1) |
| C(32) | 5380(2)  | 4269(1) | 1320(1) | 33(1) |
| C(33) | 4772(2)  | 3708(1) | 1510(1) | 29(1) |
| C(34) | 5154(3)  | 2591(1) | 260(1)  | 42(1) |
| C(35) | 6546(3)  | 4928(1) | 609(1)  | 55(1) |
| C(36) | 4216(3)  | 3703(1) | 2080(1) | 46(1) |
| C(37) | 8778(2)  | 1990(1) | 1256(1) | 30(1) |
| C(38) | 8465(2)  | 2469(1) | 1515(1) | 23(1) |
| C(39) | 8533(2)  | 3122(1) | 1736(1) | 25(1) |
| C(40) | 7989(3)  | 3273(1) | 2236(1) | 34(1) |
| C(41) | 8137(3)  | 3895(1) | 2454(1) | 47(1) |
| C(42) | 8816(3)  | 4369(1) | 2171(1) | 51(1) |
| C(43) | 9339(3)  | 4225(1) | 1668(1) | 46(1) |
| C(44) | 9202(2)  | 3604(1) | 1447(1) | 36(1) |
| C(45) | 2268(4)  | 5152(2) | 951(1)  | 69(1) |
| C(46) | 1635(3)  | 5594(1) | 724(1)  | 45(1) |
| C(47) | 849(2)   | 6126(1) | 447(1)  | 36(1) |
| C(48) | -505(3)  | 6028(1) | 128(1)  | 45(1) |
| C(49) | -1261(3) | 6558(2) | -132(1) | 61(1) |
| C(50) | -660(4)  | 7169(2) | -75(1)  | 73(1) |
| C(51) | 665(4)   | 7257(1) | 233(1)  | 73(1) |
| C(52) | 1434(3)  | 6747(1) | 498(1)  | 54(1) |
| B(1)  | 4504(2)  | 974(1)  | 2038(1) | 23(1) |

---

Table 3. Bond lengths [Å] and angles [°] for  $\text{Tp}^{\text{Ms}}\text{Cu}(\text{phenylacetylene})$ , **2**.

|              |            |              |          |
|--------------|------------|--------------|----------|
| Cu(1)-C(37)  | 1.967(2)   | C(11)-H(11A) | 0.9800   |
| Cu(1)-N(1)   | 2.0171(15) | C(11)-H(11B) | 0.9800   |
| Cu(1)-C(38)  | 2.0284(18) | C(11)-H(11C) | 0.9800   |
| Cu(1)-N(5)   | 2.0983(16) | C(12)-H(12A) | 0.9800   |
| Cu(1)-N(3)   | 2.2349(15) | C(12)-H(12B) | 0.9800   |
| N(1)-C(1)    | 1.343(2)   | C(12)-H(12C) | 0.9800   |
| N(1)-N(2)    | 1.366(2)   | C(13)-C(14)  | 1.399(3) |
| N(2)-C(3)    | 1.343(2)   | C(13)-C(16)  | 1.486(3) |
| N(2)-B(1)    | 1.546(3)   | C(14)-C(15)  | 1.374(3) |
| N(3)-C(13)   | 1.348(2)   | C(14)-H(14)  | 0.9500   |
| N(3)-N(4)    | 1.368(2)   | C(15)-H(15)  | 0.9500   |
| N(4)-C(15)   | 1.347(2)   | C(16)-C(17)  | 1.403(3) |
| N(4)-B(1)    | 1.542(2)   | C(16)-C(21)  | 1.404(3) |
| N(5)-C(25)   | 1.344(2)   | C(17)-C(18)  | 1.392(3) |
| N(5)-N(6)    | 1.371(2)   | C(17)-C(22)  | 1.510(3) |
| N(6)-C(27)   | 1.343(2)   | C(18)-C(19)  | 1.384(3) |
| N(6)-B(1)    | 1.534(2)   | C(18)-H(18)  | 0.9500   |
| C(1)-C(2)    | 1.401(2)   | C(19)-C(20)  | 1.388(3) |
| C(1)-C(4)    | 1.483(3)   | C(19)-C(23)  | 1.516(3) |
| C(2)-C(3)    | 1.373(3)   | C(20)-C(21)  | 1.393(3) |
| C(2)-H(2)    | 0.9500     | C(20)-H(20)  | 0.9500   |
| C(3)-H(3)    | 0.9500     | C(21)-C(24)  | 1.507(3) |
| C(4)-C(9)    | 1.405(2)   | C(22)-H(22A) | 0.9800   |
| C(4)-C(5)    | 1.407(2)   | C(22)-H(22B) | 0.9800   |
| C(5)-C(6)    | 1.385(3)   | C(22)-H(22C) | 0.9800   |
| C(5)-C(10)   | 1.515(3)   | C(23)-H(23A) | 0.9800   |
| C(6)-C(7)    | 1.386(3)   | C(23)-H(23B) | 0.9800   |
| C(6)-H(6)    | 0.9500     | C(23)-H(23C) | 0.9800   |
| C(7)-C(8)    | 1.391(3)   | C(24)-H(24A) | 0.9800   |
| C(7)-C(11)   | 1.506(3)   | C(24)-H(24B) | 0.9800   |
| C(8)-C(9)    | 1.387(3)   | C(24)-H(24C) | 0.9800   |
| C(8)-H(8)    | 0.9500     | C(25)-C(26)  | 1.399(3) |
| C(9)-C(12)   | 1.511(3)   | C(25)-C(28)  | 1.484(2) |
| C(10)-H(10A) | 0.9800     | C(26)-C(27)  | 1.375(3) |
| C(10)-H(10B) | 0.9800     | C(26)-H(26)  | 0.9500   |
| C(10)-H(10C) | 0.9800     | C(27)-H(27)  | 0.9500   |

|              |           |                   |            |
|--------------|-----------|-------------------|------------|
| C(28)-C(29)  | 1.394(3)  | C(47)-C(52)       | 1.391(3)   |
| C(28)-C(33)  | 1.406(3)  | C(48)-C(49)       | 1.398(4)   |
| C(29)-C(30)  | 1.397(3)  | C(48)-H(48)       | 0.9500     |
| C(29)-C(34)  | 1.513(3)  | C(49)-C(50)       | 1.377(5)   |
| C(30)-C(31)  | 1.382(3)  | C(49)-H(49)       | 0.9500     |
| C(30)-H(30)  | 0.9500    | C(50)-C(51)       | 1.348(5)   |
| C(31)-C(32)  | 1.384(3)  | C(50)-H(50)       | 0.9500     |
| C(31)-C(35)  | 1.512(3)  | C(51)-C(52)       | 1.375(4)   |
| C(32)-C(33)  | 1.386(3)  | C(51)-H(51)       | 0.9500     |
| C(32)-H(32)  | 0.9500    | C(52)-H(52)       | 0.9500     |
| C(33)-C(36)  | 1.510(3)  | B(1)-H(1)         | 1.0000     |
| C(34)-H(34A) | 0.9800    |                   |            |
| C(34)-H(34B) | 0.9800    | C(37)-Cu(1)-N(1)  | 109.06(7)  |
| C(34)-H(34C) | 0.9800    | C(37)-Cu(1)-C(38) | 35.46(8)   |
| C(35)-H(35A) | 0.9800    | N(1)-Cu(1)-C(38)  | 144.51(7)  |
| C(35)-H(35B) | 0.9800    | C(37)-Cu(1)-N(5)  | 133.14(8)  |
| C(35)-H(35C) | 0.9800    | N(1)-Cu(1)-N(5)   | 93.73(6)   |
| C(36)-H(36A) | 0.9800    | C(38)-Cu(1)-N(5)  | 111.73(7)  |
| C(36)-H(36B) | 0.9800    | C(37)-Cu(1)-N(3)  | 132.58(7)  |
| C(36)-H(36C) | 0.9800    | N(1)-Cu(1)-N(3)   | 89.46(6)   |
| C(37)-C(38)  | 1.218(3)  | C(38)-Cu(1)-N(3)  | 115.57(6)  |
| C(37)-H(37)  | 0.918(15) | N(5)-Cu(1)-N(3)   | 86.22(6)   |
| C(38)-C(39)  | 1.448(2)  | C(1)-N(1)-N(2)    | 106.91(14) |
| C(39)-C(40)  | 1.384(3)  | C(1)-N(1)-Cu(1)   | 137.27(13) |
| C(39)-C(44)  | 1.396(3)  | N(2)-N(1)-Cu(1)   | 115.81(11) |
| C(40)-C(41)  | 1.388(3)  | C(3)-N(2)-N(1)    | 109.47(15) |
| C(40)-H(40)  | 0.9500    | C(3)-N(2)-B(1)    | 129.65(16) |
| C(41)-C(42)  | 1.380(4)  | N(1)-N(2)-B(1)    | 120.85(14) |
| C(41)-H(41)  | 0.9500    | C(13)-N(3)-N(4)   | 106.01(15) |
| C(42)-C(43)  | 1.378(4)  | C(13)-N(3)-Cu(1)  | 142.59(13) |
| C(42)-H(42)  | 0.9500    | N(4)-N(3)-Cu(1)   | 111.22(10) |
| C(43)-C(44)  | 1.387(3)  | C(15)-N(4)-N(3)   | 110.16(15) |
| C(43)-H(43)  | 0.9500    | C(15)-N(4)-B(1)   | 128.25(17) |
| C(44)-H(44)  | 0.9500    | N(3)-N(4)-B(1)    | 121.40(15) |
| C(45)-C(46)  | 1.177(4)  | C(25)-N(5)-N(6)   | 106.17(15) |
| C(45)-H(45)  | 0.933(17) | C(25)-N(5)-Cu(1)  | 139.73(13) |
| C(46)-C(47)  | 1.428(3)  | N(6)-N(5)-Cu(1)   | 114.10(11) |
| C(47)-C(48)  | 1.385(3)  | C(27)-N(6)-N(5)   | 110.02(15) |

|                     |            |                     |            |
|---------------------|------------|---------------------|------------|
| C(27)-N(6)-B(1)     | 128.78(16) | C(7)-C(11)-H(11C)   | 109.5      |
| N(5)-N(6)-B(1)      | 120.68(15) | H(11A)-C(11)-H(11C) | 109.5      |
| N(1)-C(1)-C(2)      | 109.54(16) | H(11B)-C(11)-H(11C) | 109.5      |
| N(1)-C(1)-C(4)      | 120.08(15) | C(9)-C(12)-H(12A)   | 109.5      |
| C(2)-C(1)-C(4)      | 130.32(16) | C(9)-C(12)-H(12B)   | 109.5      |
| C(3)-C(2)-C(1)      | 105.25(16) | H(12A)-C(12)-H(12B) | 109.5      |
| C(3)-C(2)-H(2)      | 127.4      | C(9)-C(12)-H(12C)   | 109.5      |
| C(1)-C(2)-H(2)      | 127.4      | H(12A)-C(12)-H(12C) | 109.5      |
| N(2)-C(3)-C(2)      | 108.84(17) | H(12B)-C(12)-H(12C) | 109.5      |
| N(2)-C(3)-H(3)      | 125.6      | N(3)-C(13)-C(14)    | 110.16(17) |
| C(2)-C(3)-H(3)      | 125.6      | N(3)-C(13)-C(16)    | 121.29(17) |
| C(9)-C(4)-C(5)      | 119.46(18) | C(14)-C(13)-C(16)   | 128.54(17) |
| C(9)-C(4)-C(1)      | 121.25(16) | C(15)-C(14)-C(13)   | 105.24(17) |
| C(5)-C(4)-C(1)      | 119.20(16) | C(15)-C(14)-H(14)   | 127.4      |
| C(6)-C(5)-C(4)      | 119.20(17) | C(13)-C(14)-H(14)   | 127.4      |
| C(6)-C(5)-C(10)     | 119.76(17) | N(4)-C(15)-C(14)    | 108.43(18) |
| C(4)-C(5)-C(10)     | 121.03(18) | N(4)-C(15)-H(15)    | 125.8      |
| C(5)-C(6)-C(7)      | 122.14(18) | C(14)-C(15)-H(15)   | 125.8      |
| C(5)-C(6)-H(6)      | 118.9      | C(17)-C(16)-C(21)   | 119.85(19) |
| C(7)-C(6)-H(6)      | 118.9      | C(17)-C(16)-C(13)   | 120.02(18) |
| C(6)-C(7)-C(8)      | 117.79(19) | C(21)-C(16)-C(13)   | 120.13(17) |
| C(6)-C(7)-C(11)     | 120.5(2)   | C(18)-C(17)-C(16)   | 119.1(2)   |
| C(8)-C(7)-C(11)     | 121.73(19) | C(18)-C(17)-C(22)   | 118.88(19) |
| C(9)-C(8)-C(7)      | 122.09(18) | C(16)-C(17)-C(22)   | 121.92(19) |
| C(9)-C(8)-H(8)      | 119.0      | C(19)-C(18)-C(17)   | 121.9(2)   |
| C(7)-C(8)-H(8)      | 119.0      | C(19)-C(18)-H(18)   | 119.1      |
| C(8)-C(9)-C(4)      | 119.10(17) | C(17)-C(18)-H(18)   | 119.1      |
| C(8)-C(9)-C(12)     | 120.40(17) | C(18)-C(19)-C(20)   | 118.2(2)   |
| C(4)-C(9)-C(12)     | 120.50(18) | C(18)-C(19)-C(23)   | 120.9(2)   |
| C(5)-C(10)-H(10A)   | 109.5      | C(20)-C(19)-C(23)   | 120.8(2)   |
| C(5)-C(10)-H(10B)   | 109.5      | C(19)-C(20)-C(21)   | 122.0(2)   |
| H(10A)-C(10)-H(10B) | 109.5      | C(19)-C(20)-H(20)   | 119.0      |
| C(5)-C(10)-H(10C)   | 109.5      | C(21)-C(20)-H(20)   | 119.0      |
| H(10A)-C(10)-H(10C) | 109.5      | C(20)-C(21)-C(16)   | 118.86(19) |
| H(10B)-C(10)-H(10C) | 109.5      | C(20)-C(21)-C(24)   | 120.1(2)   |
| C(7)-C(11)-H(11A)   | 109.5      | C(16)-C(21)-C(24)   | 121.05(19) |
| C(7)-C(11)-H(11B)   | 109.5      | C(17)-C(22)-H(22A)  | 109.5      |
| H(11A)-C(11)-H(11B) | 109.5      | C(17)-C(22)-H(22B)  | 109.5      |

|                     |            |                     |            |
|---------------------|------------|---------------------|------------|
| H(22A)-C(22)-H(22B) | 109.5      | C(31)-C(32)-H(32)   | 118.9      |
| C(17)-C(22)-H(22C)  | 109.5      | C(33)-C(32)-H(32)   | 118.9      |
| H(22A)-C(22)-H(22C) | 109.5      | C(32)-C(33)-C(28)   | 118.96(19) |
| H(22B)-C(22)-H(22C) | 109.5      | C(32)-C(33)-C(36)   | 119.65(19) |
| C(19)-C(23)-H(23A)  | 109.5      | C(28)-C(33)-C(36)   | 121.39(18) |
| C(19)-C(23)-H(23B)  | 109.5      | C(29)-C(34)-H(34A)  | 109.5      |
| H(23A)-C(23)-H(23B) | 109.5      | C(29)-C(34)-H(34B)  | 109.5      |
| C(19)-C(23)-H(23C)  | 109.5      | H(34A)-C(34)-H(34B) | 109.5      |
| H(23A)-C(23)-H(23C) | 109.5      | C(29)-C(34)-H(34C)  | 109.5      |
| H(23B)-C(23)-H(23C) | 109.5      | H(34A)-C(34)-H(34C) | 109.5      |
| C(21)-C(24)-H(24A)  | 109.5      | H(34B)-C(34)-H(34C) | 109.5      |
| C(21)-C(24)-H(24B)  | 109.5      | C(31)-C(35)-H(35A)  | 109.5      |
| H(24A)-C(24)-H(24B) | 109.5      | C(31)-C(35)-H(35B)  | 109.5      |
| C(21)-C(24)-H(24C)  | 109.5      | H(35A)-C(35)-H(35B) | 109.5      |
| H(24A)-C(24)-H(24C) | 109.5      | C(31)-C(35)-H(35C)  | 109.5      |
| H(24B)-C(24)-H(24C) | 109.5      | H(35A)-C(35)-H(35C) | 109.5      |
| N(5)-C(25)-C(26)    | 110.04(16) | H(35B)-C(35)-H(35C) | 109.5      |
| N(5)-C(25)-C(28)    | 121.98(16) | C(33)-C(36)-H(36A)  | 109.5      |
| C(26)-C(25)-C(28)   | 127.92(16) | C(33)-C(36)-H(36B)  | 109.5      |
| C(27)-C(26)-C(25)   | 105.30(17) | H(36A)-C(36)-H(36B) | 109.5      |
| C(27)-C(26)-H(26)   | 127.3      | C(33)-C(36)-H(36C)  | 109.5      |
| C(25)-C(26)-H(26)   | 127.3      | H(36A)-C(36)-H(36C) | 109.5      |
| N(6)-C(27)-C(26)    | 108.47(17) | H(36B)-C(36)-H(36C) | 109.5      |
| N(6)-C(27)-H(27)    | 125.8      | C(38)-C(37)-Cu(1)   | 75.01(14)  |
| C(26)-C(27)-H(27)   | 125.8      | C(38)-C(37)-H(37)   | 161.4(15)  |
| C(29)-C(28)-C(33)   | 119.77(17) | Cu(1)-C(37)-H(37)   | 123.6(15)  |
| C(29)-C(28)-C(25)   | 121.86(16) | C(37)-C(38)-C(39)   | 159.9(2)   |
| C(33)-C(28)-C(25)   | 118.33(17) | C(37)-C(38)-Cu(1)   | 69.53(13)  |
| C(28)-C(29)-C(30)   | 119.09(18) | C(39)-C(38)-Cu(1)   | 130.59(15) |
| C(28)-C(29)-C(34)   | 121.56(18) | C(40)-C(39)-C(44)   | 119.48(18) |
| C(30)-C(29)-C(34)   | 119.35(19) | C(40)-C(39)-C(38)   | 121.36(18) |
| C(31)-C(30)-C(29)   | 121.9(2)   | C(44)-C(39)-C(38)   | 119.13(19) |
| C(31)-C(30)-H(30)   | 119.0      | C(39)-C(40)-C(41)   | 120.3(2)   |
| C(29)-C(30)-H(30)   | 119.0      | C(39)-C(40)-H(40)   | 119.9      |
| C(30)-C(31)-C(32)   | 117.93(19) | C(41)-C(40)-H(40)   | 119.9      |
| C(30)-C(31)-C(35)   | 121.5(2)   | C(42)-C(41)-C(40)   | 120.1(2)   |
| C(32)-C(31)-C(35)   | 120.5(2)   | C(42)-C(41)-H(41)   | 120.0      |
| C(31)-C(32)-C(33)   | 122.27(19) | C(40)-C(41)-H(41)   | 120.0      |

|                   |            |
|-------------------|------------|
| C(43)-C(42)-C(41) | 120.0(2)   |
| C(43)-C(42)-H(42) | 120.0      |
| C(41)-C(42)-H(42) | 120.0      |
| C(42)-C(43)-C(44) | 120.4(2)   |
| C(42)-C(43)-H(43) | 119.8      |
| C(44)-C(43)-H(43) | 119.8      |
| C(43)-C(44)-C(39) | 119.7(2)   |
| C(43)-C(44)-H(44) | 120.1      |
| C(39)-C(44)-H(44) | 120.1      |
| C(46)-C(45)-H(45) | 177(2)     |
| C(45)-C(46)-C(47) | 179.2(3)   |
| C(48)-C(47)-C(52) | 119.3(2)   |
| C(48)-C(47)-C(46) | 120.4(2)   |
| C(52)-C(47)-C(46) | 120.3(2)   |
| C(47)-C(48)-C(49) | 119.2(3)   |
| C(47)-C(48)-H(48) | 120.4      |
| C(49)-C(48)-H(48) | 120.4      |
| C(50)-C(49)-C(48) | 120.4(3)   |
| C(50)-C(49)-H(49) | 119.8      |
| C(48)-C(49)-H(49) | 119.8      |
| C(51)-C(50)-C(49) | 119.8(3)   |
| C(51)-C(50)-H(50) | 120.1      |
| C(49)-C(50)-H(50) | 120.1      |
| C(50)-C(51)-C(52) | 121.4(3)   |
| C(50)-C(51)-H(51) | 119.3      |
| C(52)-C(51)-H(51) | 119.3      |
| C(51)-C(52)-C(47) | 119.9(3)   |
| C(51)-C(52)-H(52) | 120.0      |
| C(47)-C(52)-H(52) | 120.0      |
| N(6)-B(1)-N(4)    | 108.93(14) |
| N(6)-B(1)-N(2)    | 109.54(15) |
| N(4)-B(1)-N(2)    | 109.85(15) |
| N(6)-B(1)-H(1)    | 109.5      |
| N(4)-B(1)-H(1)    | 109.5      |
| N(2)-B(1)-H(1)    | 109.5      |



---

Symmetry transformations used to generate equivalent atoms:

Table 4. Anisotropic displacement parameters ( $\text{\AA}^2 \times 10^3$ ) for  $\text{Tp}^{\text{Ms}}\text{Cu}(\text{phenylacetylene})$ , **2**. The anisotropic displacement factor exponent takes the form:  $-2\pi^2 [h^2 a^{*2} U^{11} + \dots + 2 h k a^* b^* U^{12}]$

|       | $U^{11}$ | $U^{22}$ | $U^{33}$ | $U^{23}$ | $U^{13}$ | $U^{12}$ |
|-------|----------|----------|----------|----------|----------|----------|
| Cu(1) | 24(1)    | 18(1)    | 43(1)    | -5(1)    | 16(1)    | -5(1)    |
| N(1)  | 20(1)    | 20(1)    | 29(1)    | 0(1)     | 9(1)     | -3(1)    |
| N(2)  | 19(1)    | 20(1)    | 28(1)    | 1(1)     | 7(1)     | -3(1)    |
| N(3)  | 23(1)    | 22(1)    | 25(1)    | 1(1)     | 7(1)     | -1(1)    |
| N(4)  | 23(1)    | 21(1)    | 27(1)    | 3(1)     | 10(1)    | -1(1)    |
| N(5)  | 19(1)    | 21(1)    | 29(1)    | 4(1)     | 6(1)     | -1(1)    |
| N(6)  | 18(1)    | 22(1)    | 31(1)    | 2(1)     | 8(1)     | -1(1)    |
| C(1)  | 21(1)    | 18(1)    | 24(1)    | 0(1)     | 4(1)     | 0(1)     |
| C(2)  | 28(1)    | 18(1)    | 33(1)    | -4(1)    | 5(1)     | -3(1)    |
| C(3)  | 24(1)    | 18(1)    | 32(1)    | 2(1)     | 1(1)     | -5(1)    |
| C(4)  | 24(1)    | 15(1)    | 24(1)    | -4(1)    | 5(1)     | -2(1)    |
| C(5)  | 26(1)    | 20(1)    | 25(1)    | -2(1)    | 5(1)     | 1(1)     |
| C(6)  | 24(1)    | 25(1)    | 35(1)    | -5(1)    | 5(1)     | 1(1)     |
| C(7)  | 32(1)    | 21(1)    | 36(1)    | -8(1)    | 15(1)    | -4(1)    |
| C(8)  | 39(1)    | 21(1)    | 25(1)    | -2(1)    | 11(1)    | -3(1)    |
| C(9)  | 30(1)    | 19(1)    | 24(1)    | -4(1)    | 4(1)     | 0(1)     |
| C(10) | 34(1)    | 34(1)    | 33(1)    | 8(1)     | 3(1)     | 4(1)     |
| C(11) | 41(2)    | 36(1)    | 54(1)    | -4(1)    | 24(1)    | -7(1)    |
| C(12) | 40(1)    | 36(1)    | 31(1)    | 4(1)     | -3(1)    | 5(1)     |
| C(13) | 27(1)    | 24(1)    | 24(1)    | 1(1)     | 7(1)     | 3(1)     |
| C(14) | 41(1)    | 33(1)    | 23(1)    | 4(1)     | 10(1)    | -1(1)    |
| C(15) | 33(1)    | 27(1)    | 31(1)    | 4(1)     | 15(1)    | -1(1)    |
| C(16) | 27(1)    | 29(1)    | 21(1)    | 3(1)     | 3(1)     | 2(1)     |
| C(17) | 32(1)    | 35(1)    | 21(1)    | -1(1)    | 3(1)     | 0(1)     |
| C(18) | 43(1)    | 37(1)    | 25(1)    | -5(1)    | 2(1)     | -7(1)    |
| C(19) | 34(1)    | 52(1)    | 28(1)    | -1(1)    | 1(1)     | -11(1)   |
| C(20) | 27(1)    | 53(1)    | 33(1)    | 1(1)     | 6(1)     | 2(1)     |
| C(21) | 29(1)    | 35(1)    | 24(1)    | 2(1)     | 3(1)     | 6(1)     |
| C(22) | 48(2)    | 38(1)    | 42(1)    | -13(1)   | 14(1)    | -3(1)    |
| C(23) | 46(2)    | 79(2)    | 48(2)    | -10(1)   | 6(1)     | -27(1)   |
| C(24) | 34(1)    | 37(1)    | 46(1)    | -2(1)    | 12(1)    | 9(1)     |
| C(25) | 22(1)    | 22(1)    | 25(1)    | 1(1)     | 4(1)     | 3(1)     |
| C(26) | 20(1)    | 32(1)    | 38(1)    | 6(1)     | 7(1)     | 5(1)     |

|       |        |        |       |        |        |        |
|-------|--------|--------|-------|--------|--------|--------|
| C(27) | 17(1)  | 31(1)  | 34(1) | 2(1)   | 8(1)   | 0(1)   |
| C(28) | 19(1)  | 21(1)  | 28(1) | 4(1)   | 3(1)   | 3(1)   |
| C(29) | 25(1)  | 28(1)  | 29(1) | 0(1)   | 6(1)   | -2(1)  |
| C(30) | 33(1)  | 37(1)  | 32(1) | 6(1)   | 8(1)   | -7(1)  |
| C(31) | 34(1)  | 26(1)  | 41(1) | 7(1)   | 3(1)   | -5(1)  |
| C(32) | 38(1)  | 22(1)  | 40(1) | -4(1)  | 3(1)   | 3(1)   |
| C(33) | 31(1)  | 26(1)  | 30(1) | 0(1)   | 4(1)   | 3(1)   |
| C(34) | 50(2)  | 40(1)  | 38(1) | -11(1) | 16(1)  | -10(1) |
| C(35) | 68(2)  | 40(1)  | 58(2) | 12(1)  | 5(1)   | -22(1) |
| C(36) | 59(2)  | 46(1)  | 38(1) | -11(1) | 18(1)  | -4(1)  |
| C(37) | 27(1)  | 27(1)  | 38(1) | -6(1)  | 15(1)  | -8(1)  |
| C(38) | 18(1)  | 23(1)  | 30(1) | 3(1)   | 4(1)   | -4(1)  |
| C(39) | 22(1)  | 20(1)  | 32(1) | -1(1)  | -1(1)  | -2(1)  |
| C(40) | 47(1)  | 25(1)  | 29(1) | 0(1)   | 1(1)   | -1(1)  |
| C(41) | 74(2)  | 30(1)  | 33(1) | -9(1)  | -3(1)  | 2(1)   |
| C(42) | 71(2)  | 23(1)  | 53(1) | -7(1)  | -14(1) | -6(1)  |
| C(43) | 48(2)  | 24(1)  | 66(2) | 7(1)   | 3(1)   | -10(1) |
| C(44) | 33(1)  | 26(1)  | 49(1) | 2(1)   | 9(1)   | -4(1)  |
| C(45) | 65(2)  | 77(2)  | 64(2) | 13(2)  | 10(2)  | 34(2)  |
| C(46) | 38(1)  | 57(2)  | 42(1) | 0(1)   | 10(1)  | 10(1)  |
| C(47) | 33(1)  | 44(1)  | 32(1) | -1(1)  | 14(1)  | 5(1)   |
| C(48) | 38(1)  | 63(2)  | 34(1) | 3(1)   | 12(1)  | 2(1)   |
| C(49) | 46(2)  | 103(3) | 34(1) | 7(1)   | 7(1)   | 27(2)  |
| C(50) | 109(3) | 66(2)  | 47(2) | 8(1)   | 23(2)  | 48(2)  |
| C(51) | 119(3) | 40(2)  | 63(2) | -1(1)  | 26(2)  | 14(2)  |
| C(52) | 59(2)  | 52(2)  | 51(1) | -13(1) | 11(1)  | -2(1)  |
| B(1)  | 20(1)  | 20(1)  | 30(1) | 2(1)   | 8(1)   | -2(1)  |

---

Table 5. Hydrogen coordinates ( $\times 10^4$ ) and isotropic displacement parameters ( $\text{\AA}^2 \times 10^{-3}$ ) for  $\text{Tp}^{\text{Ms}}\text{Cu}(\text{phenylacetylene})$ , **2**.

|        | x     | y    | z    | U(eq) |
|--------|-------|------|------|-------|
| H(2)   | 6225  | -609 | 924  | 31    |
| H(3)   | 4316  | -319 | 1547 | 30    |
| H(6)   | 11962 | 310  | 1105 | 33    |
| H(8)   | 9606  | 1109 | -257 | 33    |
| H(10A) | 9609  | -588 | 1571 | 51    |
| H(10B) | 9153  | 38   | 1903 | 51    |
| H(10C) | 10854 | -109 | 1862 | 51    |
| H(11A) | 12206 | 1202 | -167 | 64    |
| H(11B) | 13018 | 581  | 129  | 64    |
| H(11C) | 12987 | 1247 | 470  | 64    |
| H(12A) | 7037  | 1211 | -339 | 54    |
| H(12B) | 6250  | 1143 | 220  | 54    |
| H(12C) | 6378  | 528  | -178 | 54    |
| H(14)  | 6718  | 1358 | 3846 | 38    |
| H(15)  | 4583  | 843  | 3247 | 35    |
| H(18)  | 10165 | 3318 | 3784 | 42    |
| H(20)  | 12273 | 1975 | 2964 | 44    |
| H(22A) | 6650  | 2808 | 3411 | 63    |
| H(22B) | 7656  | 3287 | 3822 | 63    |
| H(22C) | 7271  | 2580 | 4036 | 63    |
| H(23A) | 12773 | 3432 | 3119 | 87    |
| H(23B) | 13675 | 2857 | 3453 | 87    |
| H(23C) | 12848 | 3384 | 3791 | 87    |
| H(24A) | 9590  | 790  | 2907 | 58    |
| H(24B) | 11182 | 957  | 2732 | 58    |
| H(24C) | 9727  | 1146 | 2320 | 58    |
| H(26)  | 1757  | 2726 | 1350 | 36    |
| H(27)  | 1688  | 1613 | 1764 | 32    |
| H(30)  | 6099  | 3779 | 100  | 41    |
| H(32)  | 5452  | 4641 | 1556 | 40    |
| H(34A) | 5211  | 2731 | -129 | 63    |
| H(34B) | 4227  | 2358 | 277  | 63    |

|        |          |          |          |    |
|--------|----------|----------|----------|----|
| H(34C) | 5986     | 2305     | 385      | 63 |
| H(35A) | 5844     | 5283     | 628      | 83 |
| H(35B) | 6765     | 4879     | 219      | 83 |
| H(35C) | 7459     | 5024     | 856      | 83 |
| H(36A) | 4550     | 4095     | 2288     | 70 |
| H(36B) | 4600     | 3321     | 2292     | 70 |
| H(36C) | 3135     | 3690     | 2027     | 70 |
| H(37)  | 9250(20) | 1718(10) | 1035(9)  | 36 |
| H(40)  | 7513     | 2949     | 2430     | 40 |
| H(41)  | 7771     | 3995     | 2799     | 56 |
| H(42)  | 8922     | 4794     | 2322     | 61 |
| H(43)  | 9797     | 4553     | 1472     | 55 |
| H(44)  | 9563     | 3508     | 1100     | 43 |
| H(45)  | 2760(30) | 4789(12) | 1111(13) | 82 |
| H(48)  | -915     | 5606     | 86       | 53 |
| H(49)  | -2195    | 6496     | -348     | 73 |
| H(50)  | -1178    | 7528     | -252     | 87 |
| H(51)  | 1077     | 7679     | 267      | 87 |
| H(52)  | 2363     | 6820     | 715      | 64 |
| H(1)   | 3660     | 718      | 2151     | 28 |

---

Table 6. Torsion angles [°] for  $\text{Tp}^{\text{Ms}}\text{Cu}(\text{phenylacetylene})$ , **2**.

---

|                        |             |
|------------------------|-------------|
| C(37)-Cu(1)-N(1)-C(1)  | 0.8(2)      |
| C(38)-Cu(1)-N(1)-C(1)  | 2.3(2)      |
| N(5)-Cu(1)-N(1)-C(1)   | 139.20(18)  |
| N(3)-Cu(1)-N(1)-C(1)   | -134.63(18) |
| C(37)-Cu(1)-N(1)-N(2)  | -177.95(12) |
| C(38)-Cu(1)-N(1)-N(2)  | -176.50(11) |
| N(5)-Cu(1)-N(1)-N(2)   | -39.57(12)  |
| N(3)-Cu(1)-N(1)-N(2)   | 46.60(12)   |
| C(1)-N(1)-N(2)-C(3)    | -0.15(19)   |
| Cu(1)-N(1)-N(2)-C(3)   | 178.98(11)  |
| C(1)-N(1)-N(2)-B(1)    | 178.19(14)  |
| Cu(1)-N(1)-N(2)-B(1)   | -2.68(19)   |
| C(37)-Cu(1)-N(3)-C(13) | 24.8(2)     |
| N(1)-Cu(1)-N(3)-C(13)  | 140.5(2)    |
| C(38)-Cu(1)-N(3)-C(13) | -13.4(2)    |
| N(5)-Cu(1)-N(3)-C(13)  | -125.7(2)   |
| C(37)-Cu(1)-N(3)-N(4)  | -161.32(12) |
| N(1)-Cu(1)-N(3)-N(4)   | -45.54(12)  |
| C(38)-Cu(1)-N(3)-N(4)  | 160.55(11)  |
| N(5)-Cu(1)-N(3)-N(4)   | 48.24(11)   |
| C(13)-N(3)-N(4)-C(15)  | 0.5(2)      |
| Cu(1)-N(3)-N(4)-C(15)  | -175.70(12) |
| C(13)-N(3)-N(4)-B(1)   | 175.88(16)  |
| Cu(1)-N(3)-N(4)-B(1)   | -0.29(19)   |
| C(37)-Cu(1)-N(5)-C(25) | -21.5(2)    |
| N(1)-Cu(1)-N(5)-C(25)  | -142.18(19) |
| C(38)-Cu(1)-N(5)-C(25) | 12.6(2)     |
| N(3)-Cu(1)-N(5)-C(25)  | 128.61(19)  |
| C(37)-Cu(1)-N(5)-N(6)  | 157.76(12)  |
| N(1)-Cu(1)-N(5)-N(6)   | 37.12(12)   |
| C(38)-Cu(1)-N(5)-N(6)  | -168.15(11) |
| N(3)-Cu(1)-N(5)-N(6)   | -52.09(12)  |
| C(25)-N(5)-N(6)-C(27)  | -0.1(2)     |
| Cu(1)-N(5)-N(6)-C(27)  | -179.62(12) |
| C(25)-N(5)-N(6)-B(1)   | -172.54(15) |
| Cu(1)-N(5)-N(6)-B(1)   | 7.9(2)      |

|                         |             |
|-------------------------|-------------|
| N(2)-N(1)-C(1)-C(2)     | 0.43(19)    |
| Cu(1)-N(1)-C(1)-C(2)    | -178.41(13) |
| N(2)-N(1)-C(1)-C(4)     | -176.88(14) |
| Cu(1)-N(1)-C(1)-C(4)    | 4.3(3)      |
| N(1)-C(1)-C(2)-C(3)     | -0.5(2)     |
| C(4)-C(1)-C(2)-C(3)     | 176.41(17)  |
| N(1)-N(2)-C(3)-C(2)     | -0.2(2)     |
| B(1)-N(2)-C(3)-C(2)     | -178.34(16) |
| C(1)-C(2)-C(3)-N(2)     | 0.4(2)      |
| N(1)-C(1)-C(4)-C(9)     | -85.1(2)    |
| C(2)-C(1)-C(4)-C(9)     | 98.2(2)     |
| N(1)-C(1)-C(4)-C(5)     | 91.4(2)     |
| C(2)-C(1)-C(4)-C(5)     | -85.3(2)    |
| C(9)-C(4)-C(5)-C(6)     | 4.8(2)      |
| C(1)-C(4)-C(5)-C(6)     | -171.80(16) |
| C(9)-C(4)-C(5)-C(10)    | -174.04(17) |
| C(1)-C(4)-C(5)-C(10)    | 9.4(2)      |
| C(4)-C(5)-C(6)-C(7)     | -1.5(3)     |
| C(10)-C(5)-C(6)-C(7)    | 177.32(17)  |
| C(5)-C(6)-C(7)-C(8)     | -2.6(3)     |
| C(5)-C(6)-C(7)-C(11)    | 177.02(18)  |
| C(6)-C(7)-C(8)-C(9)     | 3.6(3)      |
| C(11)-C(7)-C(8)-C(9)    | -176.04(18) |
| C(7)-C(8)-C(9)-C(4)     | -0.4(3)     |
| C(7)-C(8)-C(9)-C(12)    | 178.87(17)  |
| C(5)-C(4)-C(9)-C(8)     | -3.8(2)     |
| C(1)-C(4)-C(9)-C(8)     | 172.67(16)  |
| C(5)-C(4)-C(9)-C(12)    | 176.88(16)  |
| C(1)-C(4)-C(9)-C(12)    | -6.6(2)     |
| N(4)-N(3)-C(13)-C(14)   | -0.2(2)     |
| Cu(1)-N(3)-C(13)-C(14)  | 173.91(16)  |
| N(4)-N(3)-C(13)-C(16)   | -179.90(16) |
| Cu(1)-N(3)-C(13)-C(16)  | -5.8(3)     |
| N(3)-C(13)-C(14)-C(15)  | -0.1(2)     |
| C(16)-C(13)-C(14)-C(15) | 179.55(19)  |
| N(3)-N(4)-C(15)-C(14)   | -0.6(2)     |
| B(1)-N(4)-C(15)-C(14)   | -175.56(17) |
| C(13)-C(14)-C(15)-N(4)  | 0.4(2)      |

|                         |             |
|-------------------------|-------------|
| N(3)-C(13)-C(16)-C(17)  | 119.0(2)    |
| C(14)-C(13)-C(16)-C(17) | -60.7(3)    |
| N(3)-C(13)-C(16)-C(21)  | -60.9(2)    |
| C(14)-C(13)-C(16)-C(21) | 119.5(2)    |
| C(21)-C(16)-C(17)-C(18) | 3.4(3)      |
| C(13)-C(16)-C(17)-C(18) | -176.43(17) |
| C(21)-C(16)-C(17)-C(22) | -179.21(18) |
| C(13)-C(16)-C(17)-C(22) | 1.0(3)      |
| C(16)-C(17)-C(18)-C(19) | -0.2(3)     |
| C(22)-C(17)-C(18)-C(19) | -177.6(2)   |
| C(17)-C(18)-C(19)-C(20) | -2.5(3)     |
| C(17)-C(18)-C(19)-C(23) | 176.1(2)    |
| C(18)-C(19)-C(20)-C(21) | 2.0(3)      |
| C(23)-C(19)-C(20)-C(21) | -176.6(2)   |
| C(19)-C(20)-C(21)-C(16) | 1.2(3)      |
| C(19)-C(20)-C(21)-C(24) | -178.1(2)   |
| C(17)-C(16)-C(21)-C(20) | -3.9(3)     |
| C(13)-C(16)-C(21)-C(20) | 175.92(17)  |
| C(17)-C(16)-C(21)-C(24) | 175.40(18)  |
| C(13)-C(16)-C(21)-C(24) | -4.8(3)     |
| N(6)-N(5)-C(25)-C(26)   | 0.1(2)      |
| Cu(1)-N(5)-C(25)-C(26)  | 179.44(15)  |
| N(6)-N(5)-C(25)-C(28)   | 177.70(15)  |
| Cu(1)-N(5)-C(25)-C(28)  | -3.0(3)     |
| N(5)-C(25)-C(26)-C(27)  | -0.1(2)     |
| C(28)-C(25)-C(26)-C(27) | -177.49(18) |
| N(5)-N(6)-C(27)-C(26)   | 0.0(2)      |
| B(1)-N(6)-C(27)-C(26)   | 171.70(18)  |
| C(25)-C(26)-C(27)-N(6)  | 0.0(2)      |
| N(5)-C(25)-C(28)-C(29)  | 74.1(2)     |
| C(26)-C(25)-C(28)-C(29) | -108.8(2)   |
| N(5)-C(25)-C(28)-C(33)  | -107.9(2)   |
| C(26)-C(25)-C(28)-C(33) | 69.2(3)     |
| C(33)-C(28)-C(29)-C(30) | 0.1(3)      |
| C(25)-C(28)-C(29)-C(30) | 178.08(18)  |
| C(33)-C(28)-C(29)-C(34) | -179.82(19) |
| C(25)-C(28)-C(29)-C(34) | -1.9(3)     |
| C(28)-C(29)-C(30)-C(31) | 1.5(3)      |



|                         |             |
|-------------------------|-------------|
| C(34)-C(29)-C(30)-C(31) | -178.6(2)   |
| C(29)-C(30)-C(31)-C(32) | -1.3(3)     |
| C(29)-C(30)-C(31)-C(35) | 178.0(2)    |
| C(30)-C(31)-C(32)-C(33) | -0.4(3)     |
| C(35)-C(31)-C(32)-C(33) | -179.8(2)   |
| C(31)-C(32)-C(33)-C(28) | 1.9(3)      |
| C(31)-C(32)-C(33)-C(36) | -178.9(2)   |
| C(29)-C(28)-C(33)-C(32) | -1.8(3)     |
| C(25)-C(28)-C(33)-C(32) | -179.79(17) |
| C(29)-C(28)-C(33)-C(36) | 179.05(19)  |
| C(25)-C(28)-C(33)-C(36) | 1.0(3)      |
| N(1)-Cu(1)-C(37)-C(38)  | 178.55(12)  |
| N(5)-Cu(1)-C(37)-C(38)  | 63.83(16)   |
| N(3)-Cu(1)-C(37)-C(38)  | -73.75(16)  |
| N(1)-Cu(1)-C(38)-C(37)  | -2.36(19)   |
| N(5)-Cu(1)-C(38)-C(37)  | -135.17(13) |
| N(3)-Cu(1)-C(38)-C(37)  | 128.40(13)  |
| C(37)-Cu(1)-C(38)-C(39) | -179.6(2)   |
| N(1)-Cu(1)-C(38)-C(39)  | 178.07(13)  |
| N(5)-Cu(1)-C(38)-C(39)  | 45.26(18)   |
| N(3)-Cu(1)-C(38)-C(39)  | -51.17(18)  |
| C(37)-C(38)-C(39)-C(40) | -153.6(5)   |
| Cu(1)-C(38)-C(39)-C(40) | 25.2(3)     |
| C(37)-C(38)-C(39)-C(44) | 24.4(6)     |
| Cu(1)-C(38)-C(39)-C(44) | -156.74(15) |
| C(44)-C(39)-C(40)-C(41) | -1.4(3)     |
| C(38)-C(39)-C(40)-C(41) | 176.62(19)  |
| C(39)-C(40)-C(41)-C(42) | 0.6(3)      |
| C(40)-C(41)-C(42)-C(43) | 0.4(4)      |
| C(41)-C(42)-C(43)-C(44) | -0.6(4)     |
| C(42)-C(43)-C(44)-C(39) | -0.2(3)     |
| C(40)-C(39)-C(44)-C(43) | 1.2(3)      |
| C(38)-C(39)-C(44)-C(43) | -176.90(19) |
| C(52)-C(47)-C(48)-C(49) | -0.7(4)     |
| C(46)-C(47)-C(48)-C(49) | 179.0(2)    |
| C(47)-C(48)-C(49)-C(50) | 0.6(4)      |
| C(48)-C(49)-C(50)-C(51) | 0.0(4)      |
| C(49)-C(50)-C(51)-C(52) | -0.5(5)     |

|                         |             |
|-------------------------|-------------|
| C(50)-C(51)-C(52)-C(47) | 0.5(5)      |
| C(48)-C(47)-C(52)-C(51) | 0.1(4)      |
| C(46)-C(47)-C(52)-C(51) | -179.6(3)   |
| C(27)-N(6)-B(1)-N(4)    | -112.9(2)   |
| N(5)-N(6)-B(1)-N(4)     | 58.0(2)     |
| C(27)-N(6)-B(1)-N(2)    | 126.91(19)  |
| N(5)-N(6)-B(1)-N(2)     | -62.2(2)    |
| C(15)-N(4)-B(1)-N(6)    | 113.3(2)    |
| N(3)-N(4)-B(1)-N(6)     | -61.2(2)    |
| C(15)-N(4)-B(1)-N(2)    | -126.74(19) |
| N(3)-N(4)-B(1)-N(2)     | 58.7(2)     |
| C(3)-N(2)-B(1)-N(6)     | -122.18(19) |
| N(1)-N(2)-B(1)-N(6)     | 59.9(2)     |
| C(3)-N(2)-B(1)-N(4)     | 118.21(19)  |
| N(1)-N(2)-B(1)-N(4)     | -59.8(2)    |

---

Symmetry transformations used to generate equivalent atoms:

Table 1. Crystal data and structure refinement for  $\text{Tp}^{\text{Ms}}\text{Cu}(\text{ethyl propiolate})$ , **3**.

|                                   |                                                                                                                                                                                |                              |
|-----------------------------------|--------------------------------------------------------------------------------------------------------------------------------------------------------------------------------|------------------------------|
| Empirical formula                 | $\text{C}_{165}\text{H}_{186}\text{B}_4\text{Cl}_2\text{Cu}_4\text{N}_{24}\text{O}_8$<br>[4( $\text{C}_{41}\text{H}_{46}\text{BCuN}_6\text{O}_2$ ), $\text{CH}_2\text{Cl}_2$ ] |                              |
| Formula weight                    | 3001.68                                                                                                                                                                        |                              |
| Temperature                       | 100(2) K                                                                                                                                                                       |                              |
| Wavelength                        | 0.71073 Å                                                                                                                                                                      |                              |
| Crystal system                    | Triclinic                                                                                                                                                                      |                              |
| Space group                       | $\text{P}\bar{1}$                                                                                                                                                              |                              |
| Unit cell dimensions              | $a = 9.0009(7)$ Å                                                                                                                                                              | $\alpha = 97.899(2)^\circ$ . |
|                                   | $b = 11.2392(9)$ Å                                                                                                                                                             | $\beta = 91.176(2)^\circ$ .  |
|                                   | $c = 38.765(3)$ Å                                                                                                                                                              | $\gamma = 93.499(2)^\circ$ . |
| Volume                            | $3875.5(5)$ Å <sup>3</sup>                                                                                                                                                     |                              |
| Z                                 | 1                                                                                                                                                                              |                              |
| Density (calculated)              | 1.286 Mg/m <sup>3</sup>                                                                                                                                                        |                              |
| Absorption coefficient            | 0.641 mm <sup>-1</sup>                                                                                                                                                         |                              |
| F(000)                            | 1578                                                                                                                                                                           |                              |
| Crystal size                      | 0.30 x 0.25 x 0.20 mm <sup>3</sup>                                                                                                                                             |                              |
| Theta range for data collection   | 1.59 to 30.72°.                                                                                                                                                                |                              |
| Index ranges                      | -12 ≤ h ≤ 12, -16 ≤ k ≤ 16, -55 ≤ l ≤ 55                                                                                                                                       |                              |
| Reflections collected             | 55916                                                                                                                                                                          |                              |
| Independent reflections           | 23921 [R(int) = 0.0544]                                                                                                                                                        |                              |
| Completeness to theta = 30.72°    | 98.7 %                                                                                                                                                                         |                              |
| Absorption correction             | Semi-empirical from equivalents                                                                                                                                                |                              |
| Max. and min. transmission        | 0.8825 and 0.8309                                                                                                                                                              |                              |
| Refinement method                 | Full-matrix least-squares on F <sup>2</sup>                                                                                                                                    |                              |
| Data / restraints / parameters    | 23921 / 74 / 1000                                                                                                                                                              |                              |
| Goodness-of-fit on F <sup>2</sup> | 1.087                                                                                                                                                                          |                              |
| Final R indices [I > 2σ(I)]       | R1 = 0.0776, wR2 = 0.1802                                                                                                                                                      |                              |
| R indices (all data)              | R1 = 0.1021, wR2 = 0.1900                                                                                                                                                      |                              |
| Largest diff. peak and hole       | 1.059 and -0.935 e.Å <sup>-3</sup>                                                                                                                                             |                              |

Table 2. Atomic coordinates ( $\times 10^4$ ) and equivalent isotropic displacement parameters ( $\text{\AA}^2 \times 10^3$ ) for  $\text{Tp}^{\text{Ms}}\text{Cu}(\text{ethyl propiolate})$ , **3**.  $U(\text{eq})$  is defined as one third of the trace of the orthogonalized  $U^{ij}$  tensor.

|       | x        | y       | z       | U(eq) |
|-------|----------|---------|---------|-------|
| Cu(1) | 1773(1)  | 6579(1) | 1497(1) | 20(1) |
| O(1)  | 2766(5)  | 9205(3) | 1043(1) | 44(1) |
| N(1)  | -340(4)  | 6942(3) | 1411(1) | 19(1) |
| N(2)  | -1299(4) | 6815(3) | 1673(1) | 18(1) |
| N(3)  | 1219(4)  | 5127(3) | 1725(1) | 18(1) |
| N(4)  | -19(4)   | 5194(3) | 1924(1) | 18(1) |
| N(5)  | 1671(4)  | 7646(3) | 2045(1) | 18(1) |
| N(6)  | 383(4)   | 7346(3) | 2204(1) | 18(1) |
| C(1)  | -1139(5) | 7247(4) | 1144(1) | 20(1) |
| C(2)  | -2626(5) | 7310(4) | 1236(1) | 24(1) |
| C(3)  | -2682(5) | 7037(4) | 1570(1) | 24(1) |
| C(4)  | -462(4)  | 7426(4) | 808(1)  | 21(1) |
| C(5)  | 66(5)    | 6453(4) | 593(1)  | 26(1) |
| C(6)  | 674(6)   | 6649(4) | 276(1)  | 31(1) |
| C(7)  | 723(6)   | 7772(4) | 164(1)  | 30(1) |
| C(8)  | 184(5)   | 8724(4) | 383(1)  | 28(1) |
| C(9)  | -397(5)  | 8569(4) | 702(1)  | 24(1) |
| C(10) | -3(6)    | 5198(4) | 695(1)  | 33(1) |
| C(11) | 1330(7)  | 7951(5) | -186(1) | 45(1) |
| C(12) | -898(6)  | 9642(4) | 939(1)  | 32(1) |
| C(13) | 1685(4)  | 4021(3) | 1722(1) | 18(1) |
| C(14) | 735(4)   | 3361(4) | 1917(1) | 20(1) |
| C(15) | -317(5)  | 4137(4) | 2041(1) | 20(1) |
| C(16) | 3091(5)  | 3668(3) | 1553(1) | 19(1) |
| C(17) | 4457(4)  | 4115(4) | 1717(1) | 20(1) |
| C(18) | 5772(5)  | 3791(4) | 1560(1) | 24(1) |
| C(19) | 5788(5)  | 3026(4) | 1247(1) | 27(1) |
| C(20) | 4416(6)  | 2583(4) | 1091(1) | 27(1) |
| C(21) | 3077(5)  | 2888(4) | 1237(1) | 24(1) |
| C(22) | 4514(5)  | 4935(4) | 2060(1) | 28(1) |
| C(23) | 7230(6)  | 2674(5) | 1087(2) | 39(1) |
| C(24) | 1619(5)  | 2374(4) | 1058(1) | 32(1) |

|        |          |          |         |       |
|--------|----------|----------|---------|-------|
| C(25)  | 2419(4)  | 8479(3)  | 2276(1) | 17(1) |
| C(26)  | 1615(5)  | 8731(3)  | 2580(1) | 19(1) |
| C(27)  | 333(5)   | 7981(3)  | 2522(1) | 19(1) |
| C(28)  | 3849(5)  | 9071(3)  | 2184(1) | 18(1) |
| C(29)  | 3818(5)  | 9942(4)  | 1957(1) | 22(1) |
| C(30)  | 5153(5)  | 10533(4) | 1880(1) | 27(1) |
| C(31)  | 6507(5)  | 10267(4) | 2020(1) | 28(1) |
| C(32)  | 6511(5)  | 9398(4)  | 2241(1) | 24(1) |
| C(33)  | 5208(4)  | 8791(3)  | 2329(1) | 19(1) |
| C(34)  | 2354(5)  | 10289(4) | 1820(1) | 28(1) |
| C(35)  | 7945(6)  | 10914(5) | 1935(2) | 44(1) |
| C(36)  | 5282(5)  | 7887(4)  | 2581(1) | 24(1) |
| C(37)  | 3738(5)  | 6401(4)  | 1302(1) | 28(1) |
| C(38)  | 3201(5)  | 7260(4)  | 1185(1) | 25(1) |
| C(39)  | 3306(5)  | 8256(5)  | 979(1)  | 31(1) |
| O(2A)  | 4335(11) | 8160(9)  | 746(3)  | 34(2) |
| C(40A) | 4597(13) | 9187(10) | 561(3)  | 39(3) |
| C(41A) | 5627(14) | 8715(15) | 261(4)  | 61(4) |
| O(2B)  | 3972(12) | 7765(9)  | 666(3)  | 36(2) |
| C(40B) | 4258(13) | 8584(13) | 411(3)  | 45(3) |
| C(41B) | 5728(16) | 9290(14) | 491(5)  | 66(4) |
| B(1)   | -753(5)  | 6400(4)  | 2013(1) | 18(1) |
| Cu(2)  | 1734(1)  | 2062(1)  | 3708(1) | 17(1) |
| O(3)   | 1199(4)  | 5234(3)  | 3693(1) | 25(1) |
| O(4)   | -461(3)  | 5143(2)  | 4119(1) | 24(1) |
| N(7)   | 2064(4)  | 306(3)   | 3675(1) | 17(1) |
| N(8)   | 3313(4)  | -57(3)   | 3508(1) | 17(1) |
| N(9)   | 2365(4)  | 2127(3)  | 3207(1) | 17(1) |
| N(10)  | 3610(4)  | 1534(3)  | 3112(1) | 17(1) |
| N(11)  | 4054(4)  | 2537(3)  | 3868(1) | 18(1) |
| N(12)  | 5017(4)  | 1815(3)  | 3684(1) | 16(1) |
| C(42)  | 1314(4)  | -694(3)  | 3751(1) | 17(1) |
| C(43)  | 2090(5)  | -1711(3) | 3635(1) | 20(1) |
| C(44)  | 3337(5)  | -1258(3) | 3481(1) | 19(1) |
| C(45)  | -113(4)  | -605(3)  | 3935(1) | 16(1) |
| C(46)  | -1462(5) | -935(3)  | 3752(1) | 19(1) |
| C(47)  | -2799(5) | -773(4)  | 3927(1) | 23(1) |
| C(48)  | -2823(5) | -296(4)  | 4274(1) | 25(1) |

|       |          |          |         |       |
|-------|----------|----------|---------|-------|
| C(49) | -1471(5) | -2(4)    | 4453(1) | 23(1) |
| C(50) | -115(5)  | -157(3)  | 4293(1) | 19(1) |
| C(51) | -1499(5) | -1472(4) | 3372(1) | 28(1) |
| C(52) | -4273(6) | -139(5)  | 4451(2) | 41(1) |
| C(53) | 1346(5)  | 159(4)   | 4494(1) | 28(1) |
| C(54) | 1922(4)  | 2619(3)  | 2929(1) | 18(1) |
| C(55) | 2901(5)  | 2356(4)  | 2655(1) | 22(1) |
| C(56) | 3930(4)  | 1662(3)  | 2780(1) | 18(1) |
| C(57) | 533(4)   | 3266(3)  | 2938(1) | 17(1) |
| C(58) | 567(5)   | 4511(4)  | 2921(1) | 19(1) |
| C(59) | -761(5)  | 5080(4)  | 2935(1) | 23(1) |
| C(60) | -2124(5) | 4461(4)  | 2963(1) | 22(1) |
| C(61) | -2147(5) | 3233(4)  | 2977(1) | 23(1) |
| C(62) | -846(4)  | 2619(4)  | 2962(1) | 20(1) |
| C(63) | 2007(5)  | 5249(4)  | 2890(1) | 25(1) |
| C(64) | -3555(5) | 5100(4)  | 2982(1) | 31(1) |
| C(65) | -932(5)  | 1281(4)  | 2977(1) | 27(1) |
| C(66) | 4894(5)  | 3365(3)  | 4079(1) | 19(1) |
| C(67) | 6403(4)  | 3184(4)  | 4033(1) | 22(1) |
| C(68) | 6429(4)  | 2197(3)  | 3781(1) | 19(1) |
| C(69) | 4194(4)  | 4341(3)  | 4307(1) | 19(1) |
| C(70) | 3636(5)  | 4159(4)  | 4628(1) | 24(1) |
| C(71) | 2975(6)  | 5097(4)  | 4834(1) | 28(1) |
| C(72) | 2872(6)  | 6208(4)  | 4724(1) | 33(1) |
| C(73) | 3479(6)  | 6391(4)  | 4405(1) | 30(1) |
| C(74) | 4135(5)  | 5478(4)  | 4194(1) | 23(1) |
| C(75) | 3713(6)  | 2964(4)  | 4763(1) | 32(1) |
| C(76) | 2174(8)  | 7218(5)  | 4952(2) | 48(2) |
| C(77) | 4732(6)  | 5701(4)  | 3849(1) | 33(1) |
| C(78) | 132(5)   | 2482(4)  | 4027(1) | 25(1) |
| C(79) | 544(4)   | 3382(4)  | 3907(1) | 19(1) |
| C(80) | 504(5)   | 4677(4)  | 3885(1) | 20(1) |
| C(81) | -664(6)  | 6418(4)  | 4127(1) | 29(1) |
| C(82) | -1694(6) | 6734(4)  | 4424(1) | 33(1) |
| B(2)  | 4436(5)  | 873(4)   | 3377(1) | 16(1) |
| Cl(1) | 5835(3)  | 4636(3)  | 441(1)  | 58(1) |
| Cl(2) | 2973(4)  | 3414(4)  | 199(1)  | 64(1) |
| C(83) | 3990(15) | 4601(11) | 446(3)  | 52(3) |



Table 3. Bond lengths [Å] and angles [°] for  $\text{Tp}^{\text{Ms}}\text{Cu}(\text{ethyl propiolate})$ , **3**.

|              |          |              |          |
|--------------|----------|--------------|----------|
| Cu(1)-C(37)  | 1.950(4) | C(10)-H(10C) | 0.9800   |
| Cu(1)-C(38)  | 1.975(4) | C(11)-H(11A) | 0.9800   |
| Cu(1)-N(1)   | 2.000(3) | C(11)-H(11B) | 0.9800   |
| Cu(1)-N(3)   | 2.003(3) | C(11)-H(11C) | 0.9800   |
| Cu(1)-N(5)   | 2.296(3) | C(12)-H(12A) | 0.9800   |
| O(1)-C(39)   | 1.197(6) | C(12)-H(12B) | 0.9800   |
| N(1)-C(1)    | 1.342(5) | C(12)-H(12C) | 0.9800   |
| N(1)-N(2)    | 1.363(5) | C(13)-C(14)  | 1.399(6) |
| N(2)-C(3)    | 1.347(5) | C(13)-C(16)  | 1.486(6) |
| N(2)-B(1)    | 1.539(6) | C(14)-C(15)  | 1.377(6) |
| N(3)-C(13)   | 1.334(5) | C(14)-H(14)  | 0.9500   |
| N(3)-N(4)    | 1.367(5) | C(15)-H(15)  | 0.9500   |
| N(4)-C(15)   | 1.343(5) | C(16)-C(21)  | 1.404(6) |
| N(4)-B(1)    | 1.543(6) | C(16)-C(17)  | 1.404(5) |
| N(5)-C(25)   | 1.341(5) | C(17)-C(18)  | 1.387(6) |
| N(5)-N(6)    | 1.371(5) | C(17)-C(22)  | 1.509(6) |
| N(6)-C(27)   | 1.339(5) | C(18)-C(19)  | 1.388(6) |
| N(6)-B(1)    | 1.531(5) | C(18)-H(18)  | 0.9500   |
| C(1)-C(2)    | 1.396(6) | C(19)-C(20)  | 1.397(7) |
| C(1)-C(4)    | 1.482(6) | C(19)-C(23)  | 1.501(7) |
| C(2)-C(3)    | 1.371(6) | C(20)-C(21)  | 1.385(7) |
| C(2)-H(2)    | 0.9500   | C(20)-H(20)  | 0.9500   |
| C(3)-H(3)    | 0.9500   | C(21)-C(24)  | 1.516(6) |
| C(4)-C(5)    | 1.396(6) | C(22)-H(22A) | 0.9800   |
| C(4)-C(9)    | 1.401(6) | C(22)-H(22B) | 0.9800   |
| C(5)-C(6)    | 1.393(7) | C(22)-H(22C) | 0.9800   |
| C(5)-C(10)   | 1.514(7) | C(23)-H(23A) | 0.9800   |
| C(6)-C(7)    | 1.389(7) | C(23)-H(23B) | 0.9800   |
| C(6)-H(6)    | 0.9500   | C(23)-H(23C) | 0.9800   |
| C(7)-C(8)    | 1.390(7) | C(24)-H(24A) | 0.9800   |
| C(7)-C(11)   | 1.507(7) | C(24)-H(24B) | 0.9800   |
| C(8)-C(9)    | 1.379(6) | C(24)-H(24C) | 0.9800   |
| C(8)-H(8)    | 0.9500   | C(25)-C(26)  | 1.402(6) |
| C(9)-C(12)   | 1.512(6) | C(25)-C(28)  | 1.485(6) |
| C(10)-H(10A) | 0.9800   | C(26)-C(27)  | 1.383(6) |
| C(10)-H(10B) | 0.9800   | C(26)-H(26)  | 0.9500   |



|               |           |               |          |
|---------------|-----------|---------------|----------|
| C(27)-H(27)   | 0.9500    | C(41B)-H(41E) | 0.9800   |
| C(28)-C(29)   | 1.403(6)  | C(41B)-H(41F) | 0.9800   |
| C(28)-C(33)   | 1.406(6)  | B(1)-H(1)     | 1.0000   |
| C(29)-C(30)   | 1.395(6)  | Cu(2)-C(78)   | 1.956(4) |
| C(29)-C(34)   | 1.504(6)  | Cu(2)-C(79)   | 1.964(4) |
| C(30)-C(31)   | 1.389(7)  | Cu(2)-N(7)    | 2.000(3) |
| C(30)-H(30)   | 0.9500    | Cu(2)-N(9)    | 2.044(3) |
| C(31)-C(32)   | 1.388(7)  | Cu(2)-N(11)   | 2.179(3) |
| C(31)-C(35)   | 1.510(6)  | O(3)-C(80)    | 1.197(5) |
| C(32)-C(33)   | 1.392(6)  | O(4)-C(80)    | 1.344(5) |
| C(32)-H(32)   | 0.9500    | O(4)-C(81)    | 1.451(5) |
| C(33)-C(36)   | 1.509(6)  | N(7)-C(42)    | 1.346(5) |
| C(34)-H(34A)  | 0.9800    | N(7)-N(8)     | 1.364(5) |
| C(34)-H(34B)  | 0.9800    | N(8)-C(44)    | 1.340(5) |
| C(34)-H(34C)  | 0.9800    | N(8)-B(2)     | 1.554(5) |
| C(35)-H(35A)  | 0.9800    | N(9)-C(54)    | 1.341(5) |
| C(35)-H(35B)  | 0.9800    | N(9)-N(10)    | 1.370(5) |
| C(35)-H(35C)  | 0.9800    | N(10)-C(56)   | 1.347(5) |
| C(36)-H(36A)  | 0.9800    | N(10)-B(2)    | 1.551(6) |
| C(36)-H(36B)  | 0.9800    | N(11)-C(66)   | 1.336(5) |
| C(36)-H(36C)  | 0.9800    | N(11)-N(12)   | 1.366(5) |
| C(37)-C(38)   | 1.240(7)  | N(12)-C(68)   | 1.345(5) |
| C(37)-H(37)   | 0.95(4)   | N(12)-B(2)    | 1.542(5) |
| C(38)-C(39)   | 1.461(7)  | C(42)-C(43)   | 1.403(5) |
| C(39)-O(2A)   | 1.306(11) | C(42)-C(45)   | 1.484(6) |
| C(39)-O(2B)   | 1.422(11) | C(43)-C(44)   | 1.383(6) |
| O(2A)-C(40A)  | 1.451(12) | C(43)-H(43)   | 0.9500   |
| C(40A)-C(41A) | 1.558(14) | C(44)-H(44)   | 0.9500   |
| C(40A)-H(40A) | 0.9900    | C(45)-C(46)   | 1.398(5) |
| C(40A)-H(40B) | 0.9900    | C(45)-C(50)   | 1.408(5) |
| C(41A)-H(41A) | 0.9800    | C(46)-C(47)   | 1.401(6) |
| C(41A)-H(41B) | 0.9800    | C(46)-C(51)   | 1.514(6) |
| C(41A)-H(41C) | 0.9800    | C(47)-C(48)   | 1.379(6) |
| O(2B)-C(40B)  | 1.458(12) | C(47)-H(47)   | 0.9500   |
| C(40B)-C(41B) | 1.505(13) | C(48)-C(49)   | 1.389(6) |
| C(40B)-H(40C) | 0.9900    | C(48)-C(52)   | 1.497(7) |
| C(40B)-H(40D) | 0.9900    | C(49)-C(50)   | 1.391(6) |
| C(41B)-H(41D) | 0.9800    | C(49)-H(49)   | 0.9500   |

|              |          |                   |           |
|--------------|----------|-------------------|-----------|
| C(50)-C(53)  | 1.513(6) | C(67)-H(67)       | 0.9500    |
| C(51)-H(51A) | 0.9800   | C(68)-H(68)       | 0.9500    |
| C(51)-H(51B) | 0.9800   | C(69)-C(70)       | 1.386(6)  |
| C(51)-H(51C) | 0.9800   | C(69)-C(74)       | 1.411(6)  |
| C(52)-H(52A) | 0.9800   | C(70)-C(71)       | 1.403(6)  |
| C(52)-H(52B) | 0.9800   | C(70)-C(75)       | 1.512(6)  |
| C(52)-H(52C) | 0.9800   | C(71)-C(72)       | 1.383(7)  |
| C(53)-H(53A) | 0.9800   | C(71)-H(71)       | 0.9500    |
| C(53)-H(53B) | 0.9800   | C(72)-C(73)       | 1.397(7)  |
| C(53)-H(53C) | 0.9800   | C(72)-C(76)       | 1.517(6)  |
| C(54)-C(55)  | 1.407(6) | C(73)-C(74)       | 1.389(6)  |
| C(54)-C(57)  | 1.483(6) | C(73)-H(73)       | 0.9500    |
| C(55)-C(56)  | 1.370(6) | C(74)-C(77)       | 1.498(7)  |
| C(55)-H(55)  | 0.9500   | C(75)-H(75A)      | 0.9800    |
| C(56)-H(56)  | 0.9500   | C(75)-H(75B)      | 0.9800    |
| C(57)-C(58)  | 1.408(6) | C(75)-H(75C)      | 0.9800    |
| C(57)-C(62)  | 1.411(6) | C(76)-H(76A)      | 0.9800    |
| C(58)-C(59)  | 1.389(6) | C(76)-H(76B)      | 0.9800    |
| C(58)-C(63)  | 1.511(6) | C(76)-H(76C)      | 0.9800    |
| C(59)-C(60)  | 1.387(6) | C(77)-H(77A)      | 0.9800    |
| C(59)-H(59)  | 0.9500   | C(77)-H(77B)      | 0.9800    |
| C(60)-C(61)  | 1.387(6) | C(77)-H(77C)      | 0.9800    |
| C(60)-C(64)  | 1.511(6) | C(78)-C(79)       | 1.212(6)  |
| C(61)-C(62)  | 1.394(6) | C(78)-H(78)       | 0.96(4)   |
| C(61)-H(61)  | 0.9500   | C(79)-C(80)       | 1.473(6)  |
| C(62)-C(65)  | 1.510(6) | C(81)-C(82)       | 1.513(7)  |
| C(63)-H(63A) | 0.9800   | C(81)-H(81A)      | 0.9900    |
| C(63)-H(63B) | 0.9800   | C(81)-H(81B)      | 0.9900    |
| C(63)-H(63C) | 0.9800   | C(82)-H(82A)      | 0.9800    |
| C(64)-H(64A) | 0.9800   | C(82)-H(82B)      | 0.9800    |
| C(64)-H(64B) | 0.9800   | C(82)-H(82C)      | 0.9800    |
| C(64)-H(64C) | 0.9800   | B(2)-H(2A)        | 1.0000    |
| C(65)-H(65A) | 0.9800   | Cl(1)-C(83)       | 1.659(14) |
| C(65)-H(65B) | 0.9800   | Cl(2)-C(83)       | 1.732(13) |
| C(65)-H(65C) | 0.9800   | C(83)-H(83A)      | 0.9900    |
| C(66)-C(67)  | 1.396(6) | C(83)-H(83B)      | 0.9900    |
| C(66)-C(69)  | 1.492(6) |                   |           |
| C(67)-C(68)  | 1.378(5) | C(37)-Cu(1)-C(38) | 36.84(19) |

|                  |            |                     |          |
|------------------|------------|---------------------|----------|
| C(37)-Cu(1)-N(1) | 146.29(18) | C(9)-C(4)-C(1)      | 119.8(4) |
| C(38)-Cu(1)-N(1) | 114.01(17) | C(6)-C(5)-C(4)      | 118.8(4) |
| C(37)-Cu(1)-N(3) | 108.51(17) | C(6)-C(5)-C(10)     | 119.5(4) |
| C(38)-Cu(1)-N(3) | 144.21(17) | C(4)-C(5)-C(10)     | 121.7(4) |
| N(1)-Cu(1)-N(3)  | 94.07(14)  | C(7)-C(6)-C(5)      | 122.0(5) |
| C(37)-Cu(1)-N(5) | 117.05(17) | C(7)-C(6)-H(6)      | 119.0    |
| C(38)-Cu(1)-N(5) | 115.32(15) | C(5)-C(6)-H(6)      | 119.0    |
| N(1)-Cu(1)-N(5)  | 88.62(13)  | C(6)-C(7)-C(8)      | 118.0(4) |
| N(3)-Cu(1)-N(5)  | 85.67(13)  | C(6)-C(7)-C(11)     | 121.0(5) |
| C(1)-N(1)-N(2)   | 107.1(3)   | C(8)-C(7)-C(11)     | 121.0(4) |
| C(1)-N(1)-Cu(1)  | 136.3(3)   | C(9)-C(8)-C(7)      | 121.7(4) |
| N(2)-N(1)-Cu(1)  | 116.5(3)   | C(9)-C(8)-H(8)      | 119.2    |
| C(3)-N(2)-N(1)   | 109.4(3)   | C(7)-C(8)-H(8)      | 119.2    |
| C(3)-N(2)-B(1)   | 129.9(4)   | C(8)-C(9)-C(4)      | 119.6(4) |
| N(1)-N(2)-B(1)   | 120.5(3)   | C(8)-C(9)-C(12)     | 119.8(4) |
| C(13)-N(3)-N(4)  | 107.1(3)   | C(4)-C(9)-C(12)     | 120.5(4) |
| C(13)-N(3)-Cu(1) | 136.9(3)   | C(5)-C(10)-H(10A)   | 109.5    |
| N(4)-N(3)-Cu(1)  | 115.9(2)   | C(5)-C(10)-H(10B)   | 109.5    |
| C(15)-N(4)-N(3)  | 109.6(3)   | H(10A)-C(10)-H(10B) | 109.5    |
| C(15)-N(4)-B(1)  | 129.6(4)   | C(5)-C(10)-H(10C)   | 109.5    |
| N(3)-N(4)-B(1)   | 120.5(3)   | H(10A)-C(10)-H(10C) | 109.5    |
| C(25)-N(5)-N(6)  | 105.4(3)   | H(10B)-C(10)-H(10C) | 109.5    |
| C(25)-N(5)-Cu(1) | 143.3(3)   | C(7)-C(11)-H(11A)   | 109.5    |
| N(6)-N(5)-Cu(1)  | 111.3(2)   | C(7)-C(11)-H(11B)   | 109.5    |
| C(27)-N(6)-N(5)  | 110.7(3)   | H(11A)-C(11)-H(11B) | 109.5    |
| C(27)-N(6)-B(1)  | 129.5(3)   | C(7)-C(11)-H(11C)   | 109.5    |
| N(5)-N(6)-B(1)   | 119.7(3)   | H(11A)-C(11)-H(11C) | 109.5    |
| N(1)-C(1)-C(2)   | 109.3(4)   | H(11B)-C(11)-H(11C) | 109.5    |
| N(1)-C(1)-C(4)   | 122.1(4)   | C(9)-C(12)-H(12A)   | 109.5    |
| C(2)-C(1)-C(4)   | 128.6(4)   | C(9)-C(12)-H(12B)   | 109.5    |
| C(3)-C(2)-C(1)   | 105.8(4)   | H(12A)-C(12)-H(12B) | 109.5    |
| C(3)-C(2)-H(2)   | 127.1      | C(9)-C(12)-H(12C)   | 109.5    |
| C(1)-C(2)-H(2)   | 127.1      | H(12A)-C(12)-H(12C) | 109.5    |
| N(2)-C(3)-C(2)   | 108.4(4)   | H(12B)-C(12)-H(12C) | 109.5    |
| N(2)-C(3)-H(3)   | 125.8      | N(3)-C(13)-C(14)    | 109.6(3) |
| C(2)-C(3)-H(3)   | 125.8      | N(3)-C(13)-C(16)    | 121.5(4) |
| C(5)-C(4)-C(9)   | 119.9(4)   | C(14)-C(13)-C(16)   | 128.7(4) |
| C(5)-C(4)-C(1)   | 120.3(4)   | C(15)-C(14)-C(13)   | 105.4(4) |

|                     |          |                     |          |
|---------------------|----------|---------------------|----------|
| C(15)-C(14)-H(14)   | 127.3    | C(21)-C(24)-H(24C)  | 109.5    |
| C(13)-C(14)-H(14)   | 127.3    | H(24A)-C(24)-H(24C) | 109.5    |
| N(4)-C(15)-C(14)    | 108.3(4) | H(24B)-C(24)-H(24C) | 109.5    |
| N(4)-C(15)-H(15)    | 125.8    | N(5)-C(25)-C(26)    | 111.0(4) |
| C(14)-C(15)-H(15)   | 125.8    | N(5)-C(25)-C(28)    | 120.6(3) |
| C(21)-C(16)-C(17)   | 119.6(4) | C(26)-C(25)-C(28)   | 128.2(3) |
| C(21)-C(16)-C(13)   | 121.4(4) | C(27)-C(26)-C(25)   | 104.4(3) |
| C(17)-C(16)-C(13)   | 119.1(4) | C(27)-C(26)-H(26)   | 127.8    |
| C(18)-C(17)-C(16)   | 119.3(4) | C(25)-C(26)-H(26)   | 127.8    |
| C(18)-C(17)-C(22)   | 119.6(4) | N(6)-C(27)-C(26)    | 108.5(4) |
| C(16)-C(17)-C(22)   | 121.0(4) | N(6)-C(27)-H(27)    | 125.8    |
| C(17)-C(18)-C(19)   | 122.2(4) | C(26)-C(27)-H(27)   | 125.8    |
| C(17)-C(18)-H(18)   | 118.9    | C(29)-C(28)-C(33)   | 120.4(4) |
| C(19)-C(18)-H(18)   | 118.9    | C(29)-C(28)-C(25)   | 118.8(4) |
| C(18)-C(19)-C(20)   | 117.5(4) | C(33)-C(28)-C(25)   | 120.7(4) |
| C(18)-C(19)-C(23)   | 121.0(4) | C(30)-C(29)-C(28)   | 119.1(4) |
| C(20)-C(19)-C(23)   | 121.5(5) | C(30)-C(29)-C(34)   | 120.6(4) |
| C(21)-C(20)-C(19)   | 122.2(4) | C(28)-C(29)-C(34)   | 120.2(4) |
| C(21)-C(20)-H(20)   | 118.9    | C(31)-C(30)-C(29)   | 121.3(4) |
| C(19)-C(20)-H(20)   | 118.9    | C(31)-C(30)-H(30)   | 119.3    |
| C(20)-C(21)-C(16)   | 119.2(4) | C(29)-C(30)-H(30)   | 119.3    |
| C(20)-C(21)-C(24)   | 120.0(4) | C(32)-C(31)-C(30)   | 118.6(4) |
| C(16)-C(21)-C(24)   | 120.8(4) | C(32)-C(31)-C(35)   | 120.5(5) |
| C(17)-C(22)-H(22A)  | 109.5    | C(30)-C(31)-C(35)   | 121.0(5) |
| C(17)-C(22)-H(22B)  | 109.5    | C(31)-C(32)-C(33)   | 122.2(4) |
| H(22A)-C(22)-H(22B) | 109.5    | C(31)-C(32)-H(32)   | 118.9    |
| C(17)-C(22)-H(22C)  | 109.5    | C(33)-C(32)-H(32)   | 118.9    |
| H(22A)-C(22)-H(22C) | 109.5    | C(32)-C(33)-C(28)   | 118.4(4) |
| H(22B)-C(22)-H(22C) | 109.5    | C(32)-C(33)-C(36)   | 119.6(4) |
| C(19)-C(23)-H(23A)  | 109.5    | C(28)-C(33)-C(36)   | 122.0(4) |
| C(19)-C(23)-H(23B)  | 109.5    | C(29)-C(34)-H(34A)  | 109.5    |
| H(23A)-C(23)-H(23B) | 109.5    | C(29)-C(34)-H(34B)  | 109.5    |
| C(19)-C(23)-H(23C)  | 109.5    | H(34A)-C(34)-H(34B) | 109.5    |
| H(23A)-C(23)-H(23C) | 109.5    | C(29)-C(34)-H(34C)  | 109.5    |
| H(23B)-C(23)-H(23C) | 109.5    | H(34A)-C(34)-H(34C) | 109.5    |
| C(21)-C(24)-H(24A)  | 109.5    | H(34B)-C(34)-H(34C) | 109.5    |
| C(21)-C(24)-H(24B)  | 109.5    | C(31)-C(35)-H(35A)  | 109.5    |
| H(24A)-C(24)-H(24B) | 109.5    | C(31)-C(35)-H(35B)  | 109.5    |

|                      |           |                      |            |
|----------------------|-----------|----------------------|------------|
| H(35A)-C(35)-H(35B)  | 109.5     | C(40B)-C(41B)-H(41F) | 109.5      |
| C(31)-C(35)-H(35C)   | 109.5     | H(41D)-C(41B)-H(41F) | 109.5      |
| H(35A)-C(35)-H(35C)  | 109.5     | H(41E)-C(41B)-H(41F) | 109.5      |
| H(35B)-C(35)-H(35C)  | 109.5     | N(6)-B(1)-N(2)       | 109.8(3)   |
| C(33)-C(36)-H(36A)   | 109.5     | N(6)-B(1)-N(4)       | 109.7(3)   |
| C(33)-C(36)-H(36B)   | 109.5     | N(2)-B(1)-N(4)       | 108.9(3)   |
| H(36A)-C(36)-H(36B)  | 109.5     | N(6)-B(1)-H(1)       | 109.5      |
| C(33)-C(36)-H(36C)   | 109.5     | N(2)-B(1)-H(1)       | 109.5      |
| H(36A)-C(36)-H(36C)  | 109.5     | N(4)-B(1)-H(1)       | 109.5      |
| H(36B)-C(36)-H(36C)  | 109.5     | C(78)-Cu(2)-C(79)    | 36.02(18)  |
| C(38)-C(37)-Cu(1)    | 72.7(3)   | C(78)-Cu(2)-N(7)     | 110.51(17) |
| C(38)-C(37)-H(37)    | 153(3)    | C(79)-Cu(2)-N(7)     | 146.47(16) |
| Cu(1)-C(37)-H(37)    | 134(3)    | C(78)-Cu(2)-N(9)     | 142.06(17) |
| C(37)-C(38)-C(39)    | 151.4(5)  | C(79)-Cu(2)-N(9)     | 115.16(16) |
| C(37)-C(38)-Cu(1)    | 70.5(3)   | N(7)-Cu(2)-N(9)      | 92.35(13)  |
| C(39)-C(38)-Cu(1)    | 138.0(3)  | C(78)-Cu(2)-N(11)    | 120.66(17) |
| O(1)-C(39)-O(2A)     | 117.8(6)  | C(79)-Cu(2)-N(11)    | 108.00(14) |
| O(1)-C(39)-O(2B)     | 128.2(6)  | N(7)-Cu(2)-N(11)     | 91.24(13)  |
| O(1)-C(39)-C(38)     | 126.9(5)  | N(9)-Cu(2)-N(11)     | 87.30(13)  |
| O(2A)-C(39)-C(38)    | 113.8(6)  | C(80)-O(4)-C(81)     | 115.6(3)   |
| O(2B)-C(39)-C(38)    | 104.2(6)  | C(42)-N(7)-N(8)      | 106.8(3)   |
| C(39)-O(2A)-C(40A)   | 116.0(10) | C(42)-N(7)-Cu(2)     | 137.1(3)   |
| O(2A)-C(40A)-C(41A)  | 103.7(10) | N(8)-N(7)-Cu(2)      | 115.9(2)   |
| O(2A)-C(40A)-H(40A)  | 111.0     | C(44)-N(8)-N(7)      | 109.6(3)   |
| C(41A)-C(40A)-H(40A) | 111.0     | C(44)-N(8)-B(2)      | 129.7(3)   |
| O(2A)-C(40A)-H(40B)  | 111.0     | N(7)-N(8)-B(2)       | 120.7(3)   |
| C(41A)-C(40A)-H(40B) | 111.0     | C(54)-N(9)-N(10)     | 106.4(3)   |
| H(40A)-C(40A)-H(40B) | 109.0     | C(54)-N(9)-Cu(2)     | 138.2(3)   |
| C(39)-O(2B)-C(40B)   | 116.3(10) | N(10)-N(9)-Cu(2)     | 115.4(3)   |
| O(2B)-C(40B)-C(41B)  | 110.5(9)  | C(56)-N(10)-N(9)     | 109.8(3)   |
| O(2B)-C(40B)-H(40C)  | 109.5     | C(56)-N(10)-B(2)     | 130.0(3)   |
| C(41B)-C(40B)-H(40C) | 109.5     | N(9)-N(10)-B(2)      | 120.1(3)   |
| O(2B)-C(40B)-H(40D)  | 109.5     | C(66)-N(11)-N(12)    | 106.4(3)   |
| C(41B)-C(40B)-H(40D) | 109.5     | C(66)-N(11)-Cu(2)    | 140.7(3)   |
| H(40C)-C(40B)-H(40D) | 108.1     | N(12)-N(11)-Cu(2)    | 112.8(2)   |
| C(40B)-C(41B)-H(41D) | 109.5     | C(68)-N(12)-N(11)    | 109.9(3)   |
| C(40B)-C(41B)-H(41E) | 109.5     | C(68)-N(12)-B(2)     | 129.1(3)   |
| H(41D)-C(41B)-H(41E) | 109.5     | N(11)-N(12)-B(2)     | 120.3(3)   |

|                     |          |                     |          |
|---------------------|----------|---------------------|----------|
| N(7)-C(42)-C(43)    | 110.0(4) | H(52B)-C(52)-H(52C) | 109.5    |
| N(7)-C(42)-C(45)    | 120.2(3) | C(50)-C(53)-H(53A)  | 109.5    |
| C(43)-C(42)-C(45)   | 129.7(3) | C(50)-C(53)-H(53B)  | 109.5    |
| C(44)-C(43)-C(42)   | 104.4(3) | H(53A)-C(53)-H(53B) | 109.5    |
| C(44)-C(43)-H(43)   | 127.8    | C(50)-C(53)-H(53C)  | 109.5    |
| C(42)-C(43)-H(43)   | 127.8    | H(53A)-C(53)-H(53C) | 109.5    |
| N(8)-C(44)-C(43)    | 109.2(3) | H(53B)-C(53)-H(53C) | 109.5    |
| N(8)-C(44)-H(44)    | 125.4    | N(9)-C(54)-C(55)    | 109.9(4) |
| C(43)-C(44)-H(44)   | 125.4    | N(9)-C(54)-C(57)    | 120.3(4) |
| C(46)-C(45)-C(50)   | 119.7(4) | C(55)-C(54)-C(57)   | 129.7(4) |
| C(46)-C(45)-C(42)   | 120.1(4) | C(56)-C(55)-C(54)   | 105.1(4) |
| C(50)-C(45)-C(42)   | 120.2(3) | C(56)-C(55)-H(55)   | 127.4    |
| C(45)-C(46)-C(47)   | 119.1(4) | C(54)-C(55)-H(55)   | 127.4    |
| C(45)-C(46)-C(51)   | 121.1(4) | N(10)-C(56)-C(55)   | 108.7(4) |
| C(47)-C(46)-C(51)   | 119.8(4) | N(10)-C(56)-H(56)   | 125.7    |
| C(48)-C(47)-C(46)   | 121.9(4) | C(55)-C(56)-H(56)   | 125.7    |
| C(48)-C(47)-H(47)   | 119.0    | C(58)-C(57)-C(62)   | 119.6(4) |
| C(46)-C(47)-H(47)   | 119.0    | C(58)-C(57)-C(54)   | 121.2(4) |
| C(47)-C(48)-C(49)   | 118.2(4) | C(62)-C(57)-C(54)   | 119.2(4) |
| C(47)-C(48)-C(52)   | 120.4(4) | C(59)-C(58)-C(57)   | 119.1(4) |
| C(49)-C(48)-C(52)   | 121.4(4) | C(59)-C(58)-C(63)   | 118.9(4) |
| C(48)-C(49)-C(50)   | 122.0(4) | C(57)-C(58)-C(63)   | 122.0(4) |
| C(48)-C(49)-H(49)   | 119.0    | C(60)-C(59)-C(58)   | 122.1(4) |
| C(50)-C(49)-H(49)   | 119.0    | C(60)-C(59)-H(59)   | 118.9    |
| C(49)-C(50)-C(45)   | 119.0(4) | C(58)-C(59)-H(59)   | 118.9    |
| C(49)-C(50)-C(53)   | 121.2(4) | C(59)-C(60)-C(61)   | 118.4(4) |
| C(45)-C(50)-C(53)   | 119.8(4) | C(59)-C(60)-C(64)   | 121.2(4) |
| C(46)-C(51)-H(51A)  | 109.5    | C(61)-C(60)-C(64)   | 120.3(4) |
| C(46)-C(51)-H(51B)  | 109.5    | C(60)-C(61)-C(62)   | 121.7(4) |
| H(51A)-C(51)-H(51B) | 109.5    | C(60)-C(61)-H(61)   | 119.1    |
| C(46)-C(51)-H(51C)  | 109.5    | C(62)-C(61)-H(61)   | 119.1    |
| H(51A)-C(51)-H(51C) | 109.5    | C(61)-C(62)-C(57)   | 119.1(4) |
| H(51B)-C(51)-H(51C) | 109.5    | C(61)-C(62)-C(65)   | 119.6(4) |
| C(48)-C(52)-H(52A)  | 109.5    | C(57)-C(62)-C(65)   | 121.3(4) |
| C(48)-C(52)-H(52B)  | 109.5    | C(58)-C(63)-H(63A)  | 109.5    |
| H(52A)-C(52)-H(52B) | 109.5    | C(58)-C(63)-H(63B)  | 109.5    |
| C(48)-C(52)-H(52C)  | 109.5    | H(63A)-C(63)-H(63B) | 109.5    |
| H(52A)-C(52)-H(52C) | 109.5    | C(58)-C(63)-H(63C)  | 109.5    |

|                     |          |                     |          |
|---------------------|----------|---------------------|----------|
| H(63A)-C(63)-H(63C) | 109.5    | C(73)-C(74)-C(69)   | 118.9(4) |
| H(63B)-C(63)-H(63C) | 109.5    | C(73)-C(74)-C(77)   | 120.0(4) |
| C(60)-C(64)-H(64A)  | 109.5    | C(69)-C(74)-C(77)   | 121.1(4) |
| C(60)-C(64)-H(64B)  | 109.5    | C(70)-C(75)-H(75A)  | 109.5    |
| H(64A)-C(64)-H(64B) | 109.5    | C(70)-C(75)-H(75B)  | 109.5    |
| C(60)-C(64)-H(64C)  | 109.5    | H(75A)-C(75)-H(75B) | 109.5    |
| H(64A)-C(64)-H(64C) | 109.5    | C(70)-C(75)-H(75C)  | 109.5    |
| H(64B)-C(64)-H(64C) | 109.5    | H(75A)-C(75)-H(75C) | 109.5    |
| C(62)-C(65)-H(65A)  | 109.5    | H(75B)-C(75)-H(75C) | 109.5    |
| C(62)-C(65)-H(65B)  | 109.5    | C(72)-C(76)-H(76A)  | 109.5    |
| H(65A)-C(65)-H(65B) | 109.5    | C(72)-C(76)-H(76B)  | 109.5    |
| C(62)-C(65)-H(65C)  | 109.5    | H(76A)-C(76)-H(76B) | 109.5    |
| H(65A)-C(65)-H(65C) | 109.5    | C(72)-C(76)-H(76C)  | 109.5    |
| H(65B)-C(65)-H(65C) | 109.5    | H(76A)-C(76)-H(76C) | 109.5    |
| N(11)-C(66)-C(67)   | 110.5(3) | H(76B)-C(76)-H(76C) | 109.5    |
| N(11)-C(66)-C(69)   | 120.6(4) | C(74)-C(77)-H(77A)  | 109.5    |
| C(67)-C(66)-C(69)   | 128.9(3) | C(74)-C(77)-H(77B)  | 109.5    |
| C(68)-C(67)-C(66)   | 104.9(3) | H(77A)-C(77)-H(77B) | 109.5    |
| C(68)-C(67)-H(67)   | 127.6    | C(74)-C(77)-H(77C)  | 109.5    |
| C(66)-C(67)-H(67)   | 127.6    | H(77A)-C(77)-H(77C) | 109.5    |
| N(12)-C(68)-C(67)   | 108.4(4) | H(77B)-C(77)-H(77C) | 109.5    |
| N(12)-C(68)-H(68)   | 125.8    | C(79)-C(78)-Cu(2)   | 72.3(3)  |
| C(67)-C(68)-H(68)   | 125.8    | C(79)-C(78)-H(78)   | 166(3)   |
| C(70)-C(69)-C(74)   | 119.9(4) | Cu(2)-C(78)-H(78)   | 121(3)   |
| C(70)-C(69)-C(66)   | 121.6(4) | C(78)-C(79)-C(80)   | 151.9(4) |
| C(74)-C(69)-C(66)   | 118.5(4) | C(78)-C(79)-Cu(2)   | 71.6(3)  |
| C(69)-C(70)-C(71)   | 119.8(4) | C(80)-C(79)-Cu(2)   | 136.3(3) |
| C(69)-C(70)-C(75)   | 121.6(4) | O(3)-C(80)-O(4)     | 125.1(4) |
| C(71)-C(70)-C(75)   | 118.6(4) | O(3)-C(80)-C(79)    | 126.8(4) |
| C(72)-C(71)-C(70)   | 121.1(5) | O(4)-C(80)-C(79)    | 108.2(4) |
| C(72)-C(71)-H(71)   | 119.4    | O(4)-C(81)-C(82)    | 105.2(4) |
| C(70)-C(71)-H(71)   | 119.4    | O(4)-C(81)-H(81A)   | 110.7    |
| C(71)-C(72)-C(73)   | 118.5(4) | C(82)-C(81)-H(81A)  | 110.7    |
| C(71)-C(72)-C(76)   | 120.4(5) | O(4)-C(81)-H(81B)   | 110.7    |
| C(73)-C(72)-C(76)   | 121.1(5) | C(82)-C(81)-H(81B)  | 110.7    |
| C(74)-C(73)-C(72)   | 121.8(4) | H(81A)-C(81)-H(81B) | 108.8    |
| C(74)-C(73)-H(73)   | 119.1    | C(81)-C(82)-H(82A)  | 109.5    |
| C(72)-C(73)-H(73)   | 119.1    | C(81)-C(82)-H(82B)  | 109.5    |

|                     |          |
|---------------------|----------|
| H(82A)-C(82)-H(82B) | 109.5    |
| C(81)-C(82)-H(82C)  | 109.5    |
| H(82A)-C(82)-H(82C) | 109.5    |
| H(82B)-C(82)-H(82C) | 109.5    |
| N(12)-B(2)-N(10)    | 108.2(3) |
| N(12)-B(2)-N(8)     | 109.8(3) |
| N(10)-B(2)-N(8)     | 108.5(3) |
| N(12)-B(2)-H(2A)    | 110.1    |
| N(10)-B(2)-H(2A)    | 110.1    |
| N(8)-B(2)-H(2A)     | 110.1    |
| Cl(1)-C(83)-Cl(2)   | 118.7(7) |
| Cl(1)-C(83)-H(83A)  | 107.6    |
| Cl(2)-C(83)-H(83A)  | 107.6    |
| Cl(1)-C(83)-H(83B)  | 107.6    |
| Cl(2)-C(83)-H(83B)  | 107.6    |
| H(83A)-C(83)-H(83B) | 107.1    |



---

Symmetry transformations used to generate equivalent atoms:

Table 4. Anisotropic displacement parameters ( $\text{\AA}^2 \times 10^3$ ) for  $\text{Tp}^{\text{Ms}}\text{Cu}(\text{ethyl propiolate})$ , **3**. The anisotropic

displacement factor exponent takes the form:  $-2\pi^2 [ h^2 a^{*2}U^{11} + \dots + 2 h k a^* b^* U^{12} ]$

|       | $U^{11}$ | $U^{22}$ | $U^{33}$ | $U^{23}$ | $U^{13}$ | $U^{12}$ |
|-------|----------|----------|----------|----------|----------|----------|
| Cu(1) | 14(1)    | 21(1)    | 26(1)    | 7(1)     | 4(1)     | 2(1)     |
| O(1)  | 44(2)    | 27(2)    | 62(3)    | 16(2)    | -10(2)   | 2(2)     |
| N(1)  | 14(2)    | 20(2)    | 21(2)    | 3(1)     | 1(1)     | 1(1)     |
| N(2)  | 11(2)    | 21(2)    | 22(2)    | 5(1)     | 0(1)     | 2(1)     |
| N(3)  | 14(2)    | 16(2)    | 24(2)    | 6(1)     | 2(1)     | 4(1)     |
| N(4)  | 12(2)    | 20(2)    | 21(2)    | 3(1)     | 2(1)     | -1(1)    |
| N(5)  | 14(2)    | 19(2)    | 21(2)    | 2(1)     | 1(1)     | 1(1)     |
| N(6)  | 14(2)    | 18(2)    | 20(2)    | 1(1)     | 2(1)     | 2(1)     |
| C(1)  | 15(2)    | 20(2)    | 25(2)    | 3(2)     | 1(2)     | 1(2)     |
| C(2)  | 14(2)    | 30(2)    | 30(2)    | 11(2)    | -1(2)    | 1(2)     |
| C(3)  | 14(2)    | 25(2)    | 34(2)    | 7(2)     | -1(2)    | 3(2)     |
| C(4)  | 14(2)    | 28(2)    | 22(2)    | 9(2)     | -3(2)    | -1(2)    |
| C(5)  | 25(2)    | 29(2)    | 23(2)    | 6(2)     | -3(2)    | 0(2)     |
| C(6)  | 34(3)    | 34(2)    | 25(2)    | 5(2)     | 3(2)     | 6(2)     |
| C(7)  | 30(2)    | 37(3)    | 23(2)    | 10(2)    | 0(2)     | 3(2)     |
| C(8)  | 27(2)    | 25(2)    | 33(2)    | 11(2)    | 0(2)     | 1(2)     |
| C(9)  | 21(2)    | 26(2)    | 27(2)    | 7(2)     | -2(2)    | 1(2)     |
| C(10) | 42(3)    | 24(2)    | 33(3)    | 4(2)     | 3(2)     | 4(2)     |
| C(11) | 60(4)    | 44(3)    | 34(3)    | 16(2)    | 15(3)    | 10(3)    |
| C(12) | 41(3)    | 24(2)    | 34(3)    | 10(2)    | 6(2)     | 5(2)     |
| C(13) | 12(2)    | 18(2)    | 23(2)    | 2(1)     | -1(2)    | 1(1)     |
| C(14) | 15(2)    | 15(2)    | 31(2)    | 5(2)     | 0(2)     | 2(2)     |
| C(15) | 16(2)    | 21(2)    | 24(2)    | 6(2)     | 1(2)     | -4(2)    |
| C(16) | 17(2)    | 15(2)    | 26(2)    | 5(1)     | 2(2)     | 5(2)     |
| C(17) | 14(2)    | 20(2)    | 26(2)    | 6(2)     | 0(2)     | 2(2)     |
| C(18) | 15(2)    | 26(2)    | 34(2)    | 11(2)    | 3(2)     | 7(2)     |
| C(19) | 26(2)    | 26(2)    | 33(2)    | 11(2)    | 7(2)     | 8(2)     |
| C(20) | 33(2)    | 20(2)    | 31(2)    | 2(2)     | 8(2)     | 12(2)    |
| C(21) | 21(2)    | 20(2)    | 31(2)    | 5(2)     | -2(2)    | 2(2)     |
| C(22) | 17(2)    | 34(2)    | 32(2)    | 0(2)     | -1(2)    | 1(2)     |
| C(23) | 33(3)    | 44(3)    | 44(3)    | 10(2)    | 15(2)    | 20(2)    |
| C(24) | 27(2)    | 29(2)    | 36(3)    | -1(2)    | -5(2)    | 1(2)     |

|        |       |         |        |       |        |        |
|--------|-------|---------|--------|-------|--------|--------|
| C(25)  | 14(2) | 13(2)   | 24(2)  | 4(1)  | -1(2)  | 1(1)   |
| C(26)  | 20(2) | 16(2)   | 21(2)  | 3(1)  | 0(2)   | 3(2)   |
| C(27)  | 16(2) | 20(2)   | 22(2)  | 4(1)  | 4(2)   | 6(2)   |
| C(28)  | 19(2) | 16(2)   | 19(2)  | 0(1)  | 1(2)   | 4(2)   |
| C(29)  | 24(2) | 17(2)   | 23(2)  | 2(2)  | -2(2)  | -1(2)  |
| C(30)  | 30(2) | 25(2)   | 28(2)  | 8(2)  | 3(2)   | -2(2)  |
| C(31)  | 22(2) | 30(2)   | 30(2)  | 3(2)  | 3(2)   | -8(2)  |
| C(32)  | 18(2) | 26(2)   | 29(2)  | 1(2)  | 0(2)   | 0(2)   |
| C(33)  | 15(2) | 17(2)   | 23(2)  | -1(1) | -1(2)  | 3(2)   |
| C(34)  | 30(2) | 23(2)   | 33(2)  | 10(2) | -8(2)  | 4(2)   |
| C(35)  | 30(3) | 53(3)   | 48(3)  | 13(3) | 4(2)   | -18(2) |
| C(36)  | 21(2) | 23(2)   | 30(2)  | 6(2)  | -1(2)  | 5(2)   |
| C(37)  | 12(2) | 32(2)   | 43(3)  | 13(2) | 5(2)   | 1(2)   |
| C(38)  | 15(2) | 30(2)   | 29(2)  | 6(2)  | 3(2)   | 0(2)   |
| C(39)  | 16(2) | 39(3)   | 43(3)  | 19(2) | 1(2)   | -2(2)  |
| O(2A)  | 16(5) | 43(6)   | 47(5)  | 26(4) | 4(4)   | -3(4)  |
| C(40A) | 26(5) | 43(6)   | 53(7)  | 31(5) | -7(5)  | -15(5) |
| C(41A) | 27(6) | 109(13) | 55(8)  | 46(7) | -4(5)  | -7(7)  |
| O(2B)  | 18(5) | 51(6)   | 45(6)  | 32(4) | 2(4)   | -5(4)  |
| C(40B) | 27(5) | 74(9)   | 44(7)  | 41(6) | 1(5)   | 5(5)   |
| C(41B) | 46(8) | 74(10)  | 87(11) | 58(8) | -22(8) | -27(7) |
| B(1)   | 15(2) | 19(2)   | 20(2)  | 4(2)  | 1(2)   | 0(2)   |
| Cu(2)  | 15(1) | 12(1)   | 25(1)  | 3(1)  | 5(1)   | 4(1)   |
| O(3)   | 26(2) | 16(1)   | 32(2)  | 4(1)  | 8(1)   | 1(1)   |
| O(4)   | 25(2) | 12(1)   | 37(2)  | 5(1)  | 14(1)  | 7(1)   |
| N(7)   | 14(2) | 16(2)   | 22(2)  | 2(1)  | 4(1)   | 4(1)   |
| N(8)   | 14(2) | 16(2)   | 22(2)  | 2(1)  | 3(1)   | 5(1)   |
| N(9)   | 13(2) | 16(2)   | 23(2)  | 3(1)  | 0(1)   | 5(1)   |
| N(10)  | 12(2) | 14(2)   | 24(2)  | 2(1)  | 2(1)   | 3(1)   |
| N(11)  | 16(2) | 15(2)   | 23(2)  | -1(1) | 0(1)   | 2(1)   |
| N(12)  | 10(1) | 16(2)   | 23(2)  | 1(1)  | 1(1)   | 4(1)   |
| C(42)  | 18(2) | 13(2)   | 20(2)  | 5(1)  | 1(2)   | 2(1)   |
| C(43)  | 21(2) | 10(2)   | 30(2)  | 4(1)  | 4(2)   | 3(2)   |
| C(44)  | 18(2) | 14(2)   | 26(2)  | 4(1)  | 0(2)   | 8(2)   |
| C(45)  | 18(2) | 8(2)    | 22(2)  | 6(1)  | 4(2)   | 3(1)   |
| C(46)  | 19(2) | 15(2)   | 23(2)  | 4(1)  | 0(2)   | 4(2)   |
| C(47)  | 15(2) | 17(2)   | 37(2)  | 6(2)  | -2(2)  | 1(2)   |
| C(48)  | 22(2) | 16(2)   | 38(2)  | 7(2)  | 10(2)  | 9(2)   |

|       |       |       |       |       |        |       |
|-------|-------|-------|-------|-------|--------|-------|
| C(49) | 29(2) | 14(2) | 25(2) | 2(2)  | 10(2)  | 4(2)  |
| C(50) | 20(2) | 13(2) | 24(2) | 5(1)  | 2(2)   | 2(2)  |
| C(51) | 29(2) | 28(2) | 27(2) | 3(2)  | -7(2)  | -1(2) |
| C(52) | 29(3) | 34(3) | 59(3) | 1(2)  | 19(2)  | 9(2)  |
| C(53) | 30(2) | 27(2) | 26(2) | 6(2)  | -3(2)  | 2(2)  |
| C(54) | 16(2) | 16(2) | 21(2) | 2(1)  | 0(2)   | 3(2)  |
| C(55) | 20(2) | 23(2) | 23(2) | 5(2)  | -1(2)  | 2(2)  |
| C(56) | 16(2) | 18(2) | 21(2) | 1(1)  | 2(2)   | 2(2)  |
| C(57) | 16(2) | 20(2) | 17(2) | 4(1)  | 0(2)   | 4(2)  |
| C(58) | 19(2) | 23(2) | 17(2) | 5(1)  | 1(2)   | 2(2)  |
| C(59) | 24(2) | 23(2) | 22(2) | 3(2)  | 2(2)   | 9(2)  |
| C(60) | 22(2) | 27(2) | 17(2) | 6(2)  | 0(2)   | 10(2) |
| C(61) | 14(2) | 28(2) | 28(2) | 5(2)  | 2(2)   | 3(2)  |
| C(62) | 14(2) | 21(2) | 25(2) | 4(2)  | -3(2)  | 1(2)  |
| C(63) | 23(2) | 19(2) | 34(2) | 6(2)  | 8(2)   | 2(2)  |
| C(64) | 25(2) | 35(2) | 35(3) | 7(2)  | -1(2)  | 16(2) |
| C(65) | 23(2) | 19(2) | 40(3) | 6(2)  | -2(2)  | -2(2) |
| C(66) | 16(2) | 18(2) | 23(2) | -1(1) | 1(2)   | 2(2)  |
| C(67) | 11(2) | 21(2) | 33(2) | -1(2) | -3(2)  | 2(2)  |
| C(68) | 11(2) | 17(2) | 29(2) | 3(2)  | 1(2)   | 0(2)  |
| C(69) | 15(2) | 17(2) | 25(2) | -2(2) | 0(2)   | 3(2)  |
| C(70) | 22(2) | 19(2) | 29(2) | -1(2) | -1(2)  | 2(2)  |
| C(71) | 34(3) | 24(2) | 26(2) | -2(2) | 2(2)   | 9(2)  |
| C(72) | 42(3) | 22(2) | 32(2) | -5(2) | -2(2)  | 11(2) |
| C(73) | 41(3) | 17(2) | 33(2) | 1(2)  | -6(2)  | 8(2)  |
| C(74) | 22(2) | 21(2) | 27(2) | 2(2)  | -3(2)  | 4(2)  |
| C(75) | 42(3) | 19(2) | 37(3) | 6(2)  | 12(2)  | 5(2)  |
| C(76) | 72(4) | 28(2) | 43(3) | -8(2) | 5(3)   | 25(3) |
| C(77) | 36(3) | 29(2) | 34(3) | 8(2)  | 0(2)   | 9(2)  |
| C(78) | 20(2) | 22(2) | 36(2) | 5(2)  | 15(2)  | 11(2) |
| C(79) | 13(2) | 19(2) | 25(2) | 2(2)  | 4(2)   | 5(2)  |
| C(80) | 17(2) | 17(2) | 25(2) | 2(2)  | 2(2)   | 3(2)  |
| C(81) | 40(3) | 12(2) | 38(3) | 7(2)  | 14(2)  | 7(2)  |
| C(82) | 40(3) | 17(2) | 44(3) | 4(2)  | 16(2)  | 11(2) |
| B(2)  | 14(2) | 15(2) | 20(2) | 2(2)  | 3(2)   | 4(2)  |
| Cl(1) | 33(1) | 86(2) | 63(2) | 33(2) | -5(1)  | 11(2) |
| Cl(2) | 59(2) | 85(2) | 45(2) | 9(2)  | -3(2)  | -9(2) |
| C(83) | 61(8) | 48(7) | 49(7) | 7(5)  | -17(6) | 27(6) |



Table 5. Hydrogen coordinates ( $\times 10^4$ ) and isotropic displacement parameters ( $\text{\AA}^2 \times 10^{-3}$ )  
for ea07210a.

|        | x     | y     | z    | U(eq) |
|--------|-------|-------|------|-------|
| H(2)   | -3434 | 7501  | 1097 | 29    |
| H(3)   | -3547 | 7010  | 1706 | 28    |
| H(6)   | 1066  | 5994  | 133  | 37    |
| H(8)   | 218   | 9500  | 312  | 33    |
| H(10A) | 176   | 4613  | 490  | 49    |
| H(10B) | -990  | 5012  | 784  | 49    |
| H(10C) | 759   | 5156  | 876  | 49    |
| H(11A) | 2093  | 7380  | -248 | 67    |
| H(11B) | 1772  | 8775  | -175 | 67    |
| H(11C) | 521   | 7817  | -363 | 67    |
| H(12A) | -221  | 9818  | 1144 | 48    |
| H(12B) | -1910 | 9462  | 1015 | 48    |
| H(12C) | -889  | 10342 | 814  | 48    |
| H(14)  | 801   | 2548  | 1955 | 24    |
| H(15)  | -1117 | 3957  | 2185 | 24    |
| H(18)  | 6693  | 4104  | 1671 | 29    |
| H(20)  | 4401  | 2054  | 877  | 33    |
| H(22A) | 5555  | 5144  | 2135 | 42    |
| H(22B) | 4006  | 4523  | 2235 | 42    |
| H(22C) | 4020  | 5670  | 2032 | 42    |
| H(23A) | 8064  | 3070  | 1234 | 58    |
| H(23B) | 7285  | 2923  | 855  | 58    |
| H(23C) | 7281  | 1799  | 1068 | 58    |
| H(24A) | 1147  | 3004  | 951  | 48    |
| H(24B) | 956   | 2080  | 1229 | 48    |
| H(24C) | 1812  | 1707  | 877  | 48    |
| H(26)  | 1889  | 9292  | 2781 | 23    |
| H(27)  | -451  | 7925  | 2681 | 23    |
| H(30)  | 5135  | 11129 | 1728 | 33    |
| H(32)  | 7435  | 9211  | 2337 | 29    |
| H(34A) | 2529  | 10963 | 1687 | 42    |
| H(34B) | 1713  | 10530 | 2015 | 42    |

|        |          |          |          |    |
|--------|----------|----------|----------|----|
| H(34C) | 1867     | 9601     | 1668     | 42 |
| H(35A) | 8444     | 11310    | 2152     | 66 |
| H(35B) | 7731     | 11519    | 1785     | 66 |
| H(35C) | 8594     | 10332    | 1815     | 66 |
| H(36A) | 6208     | 7474     | 2550     | 36 |
| H(36B) | 4429     | 7297     | 2537     | 36 |
| H(36C) | 5257     | 8304     | 2820     | 36 |
| H(37)  | 4540(40) | 5910(40) | 1337(13) | 34 |
| H(40A) | 5095     | 9878     | 715      | 47 |
| H(40B) | 3652     | 9437     | 467      | 47 |
| H(41A) | 6262     | 8121     | 340      | 91 |
| H(41B) | 6252     | 9389     | 196      | 91 |
| H(41C) | 5015     | 8338     | 59       | 91 |
| H(40C) | 3450     | 9145     | 414      | 54 |
| H(40D) | 4269     | 8119     | 175      | 54 |
| H(41D) | 5671     | 9830     | 711      | 99 |
| H(41E) | 5957     | 9765     | 303      | 99 |
| H(41F) | 6512     | 8734     | 512      | 99 |
| H(1)   | -1618    | 6286     | 2166     | 22 |
| H(43)  | 1821     | -2527    | 3656     | 24 |
| H(44)  | 4090     | -1723    | 3374     | 23 |
| H(47)  | -3716    | -999     | 3802     | 28 |
| H(49)  | -1472    | 316      | 4693     | 27 |
| H(51A) | -669     | -1107    | 3255     | 42 |
| H(51B) | -2443    | -1315    | 3262     | 42 |
| H(51C) | -1407    | -2343    | 3353     | 42 |
| H(52A) | -4083    | 201      | 4696     | 61 |
| H(52B) | -4828    | -923     | 4439     | 61 |
| H(52C) | -4858    | 406      | 4335     | 61 |
| H(53A) | 1150     | 499      | 4734     | 41 |
| H(53B) | 1941     | 752      | 4383     | 41 |
| H(53C) | 1893     | -568     | 4495     | 41 |
| H(55)  | 2857     | 2606     | 2431     | 26 |
| H(56)  | 4735     | 1327     | 2655     | 22 |
| H(59)  | -736     | 5921     | 2925     | 27 |
| H(61)  | -3074    | 2799     | 2997     | 28 |
| H(63A) | 2257     | 5208     | 2644     | 38 |
| H(63B) | 2807     | 4930     | 3019     | 38 |

|        |          |          |          |    |
|--------|----------|----------|----------|----|
| H(63C) | 1889     | 6089     | 2988     | 38 |
| H(64A) | -3451    | 5800     | 3163     | 46 |
| H(64B) | -4373    | 4548     | 3037     | 46 |
| H(64C) | -3768    | 5366     | 2756     | 46 |
| H(65A) | -565     | 1132     | 3206     | 41 |
| H(65B) | -319     | 883      | 2796     | 41 |
| H(65C) | -1969    | 960      | 2940     | 41 |
| H(67)  | 7230     | 3642     | 4151     | 26 |
| H(68)  | 7297     | 1844     | 3690     | 23 |
| H(71)  | 2592     | 4966     | 5053     | 34 |
| H(73)  | 3443     | 7159     | 4330     | 36 |
| H(75A) | 2713     | 2564     | 4756     | 48 |
| H(75B) | 4111     | 3099     | 5003     | 48 |
| H(75C) | 4366     | 2455     | 4616     | 48 |
| H(76A) | 2516     | 7234     | 5194     | 72 |
| H(76B) | 1087     | 7083     | 4936     | 72 |
| H(76C) | 2466     | 7988     | 4873     | 72 |
| H(77A) | 4739     | 6563     | 3831     | 49 |
| H(77B) | 4098     | 5248     | 3661     | 49 |
| H(77C) | 5749     | 5439     | 3829     | 49 |
| H(78)  | -390(50) | 1880(30) | 4139(12) | 30 |
| H(81A) | -1116    | 6577     | 3904     | 35 |
| H(81B) | 301      | 6893     | 4168     | 35 |
| H(82A) | -2643    | 6256     | 4378     | 50 |
| H(82B) | -1872    | 7592     | 4446     | 50 |
| H(82C) | -1235    | 6558     | 4641     | 50 |
| H(2A)  | 5286     | 456      | 3263     | 19 |
| H(83A) | 3678     | 5356     | 370      | 62 |
| H(83B) | 3695     | 4613     | 691      | 62 |

---



Table 6. Torsion angles [°] for  $\text{Tp}^{\text{Ms}}\text{Cu}(\text{ethyl propiolate})$ , **3**.

---

|                        |           |
|------------------------|-----------|
| C(37)-Cu(1)-N(1)-C(1)  | -2.2(6)   |
| C(38)-Cu(1)-N(1)-C(1)  | 22.2(4)   |
| N(3)-Cu(1)-N(1)-C(1)   | -135.1(4) |
| N(5)-Cu(1)-N(1)-C(1)   | 139.4(4)  |
| C(37)-Cu(1)-N(1)-N(2)  | 174.2(3)  |
| C(38)-Cu(1)-N(1)-N(2)  | -161.4(3) |
| N(3)-Cu(1)-N(1)-N(2)   | 41.4(3)   |
| N(5)-Cu(1)-N(1)-N(2)   | -44.2(3)  |
| C(1)-N(1)-N(2)-C(3)    | 0.1(4)    |
| Cu(1)-N(1)-N(2)-C(3)   | -177.3(3) |
| C(1)-N(1)-N(2)-B(1)    | 176.8(3)  |
| Cu(1)-N(1)-N(2)-B(1)   | -0.6(4)   |
| C(37)-Cu(1)-N(3)-C(13) | -15.8(5)  |
| C(38)-Cu(1)-N(3)-C(13) | -3.9(6)   |
| N(1)-Cu(1)-N(3)-C(13)  | 138.8(4)  |
| N(5)-Cu(1)-N(3)-C(13)  | -132.9(4) |
| C(37)-Cu(1)-N(3)-N(4)  | 169.9(3)  |
| C(38)-Cu(1)-N(3)-N(4)  | -178.3(3) |
| N(1)-Cu(1)-N(3)-N(4)   | -35.5(3)  |
| N(5)-Cu(1)-N(3)-N(4)   | 52.8(3)   |
| C(13)-N(3)-N(4)-C(15)  | -0.1(4)   |
| Cu(1)-N(3)-N(4)-C(15)  | 175.9(3)  |
| C(13)-N(3)-N(4)-B(1)   | 173.8(3)  |
| Cu(1)-N(3)-N(4)-B(1)   | -10.2(4)  |
| C(37)-Cu(1)-N(5)-C(25) | 22.6(5)   |
| C(38)-Cu(1)-N(5)-C(25) | -18.6(5)  |
| N(1)-Cu(1)-N(5)-C(25)  | -134.7(5) |
| N(3)-Cu(1)-N(5)-C(25)  | 131.2(5)  |
| C(37)-Cu(1)-N(5)-N(6)  | -157.3(3) |
| C(38)-Cu(1)-N(5)-N(6)  | 161.5(3)  |
| N(1)-Cu(1)-N(5)-N(6)   | 45.4(3)   |
| N(3)-Cu(1)-N(5)-N(6)   | -48.8(3)  |
| C(25)-N(5)-N(6)-C(27)  | 0.5(4)    |
| Cu(1)-N(5)-N(6)-C(27)  | -179.5(3) |
| C(25)-N(5)-N(6)-B(1)   | -179.7(3) |
| Cu(1)-N(5)-N(6)-B(1)   | 0.2(4)    |

|                         |           |
|-------------------------|-----------|
| N(2)-N(1)-C(1)-C(2)     | -0.4(4)   |
| Cu(1)-N(1)-C(1)-C(2)    | 176.3(3)  |
| N(2)-N(1)-C(1)-C(4)     | -178.2(4) |
| Cu(1)-N(1)-C(1)-C(4)    | -1.5(6)   |
| N(1)-C(1)-C(2)-C(3)     | 0.4(5)    |
| C(4)-C(1)-C(2)-C(3)     | 178.1(4)  |
| N(1)-N(2)-C(3)-C(2)     | 0.2(5)    |
| B(1)-N(2)-C(3)-C(2)     | -176.1(4) |
| C(1)-C(2)-C(3)-N(2)     | -0.4(5)   |
| N(1)-C(1)-C(4)-C(5)     | 67.2(5)   |
| C(2)-C(1)-C(4)-C(5)     | -110.2(5) |
| N(1)-C(1)-C(4)-C(9)     | -115.0(5) |
| C(2)-C(1)-C(4)-C(9)     | 67.7(6)   |
| C(9)-C(4)-C(5)-C(6)     | 1.1(6)    |
| C(1)-C(4)-C(5)-C(6)     | 179.0(4)  |
| C(9)-C(4)-C(5)-C(10)    | -179.1(4) |
| C(1)-C(4)-C(5)-C(10)    | -1.2(6)   |
| C(4)-C(5)-C(6)-C(7)     | -2.2(7)   |
| C(10)-C(5)-C(6)-C(7)    | 177.9(5)  |
| C(5)-C(6)-C(7)-C(8)     | 2.0(7)    |
| C(5)-C(6)-C(7)-C(11)    | -177.5(5) |
| C(6)-C(7)-C(8)-C(9)     | -0.6(7)   |
| C(11)-C(7)-C(8)-C(9)    | 178.9(5)  |
| C(7)-C(8)-C(9)-C(4)     | -0.4(7)   |
| C(7)-C(8)-C(9)-C(12)    | 176.9(4)  |
| C(5)-C(4)-C(9)-C(8)     | 0.2(6)    |
| C(1)-C(4)-C(9)-C(8)     | -177.7(4) |
| C(5)-C(4)-C(9)-C(12)    | -177.1(4) |
| C(1)-C(4)-C(9)-C(12)    | 5.0(6)    |
| N(4)-N(3)-C(13)-C(14)   | 0.5(4)    |
| Cu(1)-N(3)-C(13)-C(14)  | -174.2(3) |
| N(4)-N(3)-C(13)-C(16)   | -174.8(3) |
| Cu(1)-N(3)-C(13)-C(16)  | 10.5(6)   |
| N(3)-C(13)-C(14)-C(15)  | -0.7(5)   |
| C(16)-C(13)-C(14)-C(15) | 174.2(4)  |
| N(3)-N(4)-C(15)-C(14)   | -0.4(5)   |
| B(1)-N(4)-C(15)-C(14)   | -173.5(4) |
| C(13)-C(14)-C(15)-N(4)  | 0.6(5)    |

|                         |           |
|-------------------------|-----------|
| N(3)-C(13)-C(16)-C(21)  | -107.7(5) |
| C(14)-C(13)-C(16)-C(21) | 77.9(6)   |
| N(3)-C(13)-C(16)-C(17)  | 73.0(5)   |
| C(14)-C(13)-C(16)-C(17) | -101.4(5) |
| C(21)-C(16)-C(17)-C(18) | 0.9(6)    |
| C(13)-C(16)-C(17)-C(18) | -179.8(4) |
| C(21)-C(16)-C(17)-C(22) | -178.8(4) |
| C(13)-C(16)-C(17)-C(22) | 0.5(6)    |
| C(16)-C(17)-C(18)-C(19) | -0.6(7)   |
| C(22)-C(17)-C(18)-C(19) | 179.1(4)  |
| C(17)-C(18)-C(19)-C(20) | 0.0(7)    |
| C(17)-C(18)-C(19)-C(23) | -178.9(4) |
| C(18)-C(19)-C(20)-C(21) | 0.3(7)    |
| C(23)-C(19)-C(20)-C(21) | 179.3(5)  |
| C(19)-C(20)-C(21)-C(16) | -0.1(7)   |
| C(19)-C(20)-C(21)-C(24) | -179.6(4) |
| C(17)-C(16)-C(21)-C(20) | -0.5(6)   |
| C(13)-C(16)-C(21)-C(20) | -179.9(4) |
| C(17)-C(16)-C(21)-C(24) | 179.0(4)  |
| C(13)-C(16)-C(21)-C(24) | -0.3(6)   |
| N(6)-N(5)-C(25)-C(26)   | -0.9(4)   |
| Cu(1)-N(5)-C(25)-C(26)  | 179.2(3)  |
| N(6)-N(5)-C(25)-C(28)   | -176.5(3) |
| Cu(1)-N(5)-C(25)-C(28)  | 3.6(7)    |
| N(5)-C(25)-C(26)-C(27)  | 0.9(5)    |
| C(28)-C(25)-C(26)-C(27) | 176.1(4)  |
| N(5)-N(6)-C(27)-C(26)   | 0.0(5)    |
| B(1)-N(6)-C(27)-C(26)   | -179.6(4) |
| C(25)-C(26)-C(27)-N(6)  | -0.6(4)   |
| N(5)-C(25)-C(28)-C(29)  | 74.3(5)   |
| C(26)-C(25)-C(28)-C(29) | -100.4(5) |
| N(5)-C(25)-C(28)-C(33)  | -107.5(4) |
| C(26)-C(25)-C(28)-C(33) | 77.7(5)   |
| C(33)-C(28)-C(29)-C(30) | -0.4(6)   |
| C(25)-C(28)-C(29)-C(30) | 177.7(4)  |
| C(33)-C(28)-C(29)-C(34) | -176.4(4) |
| C(25)-C(28)-C(29)-C(34) | 1.8(5)    |
| C(28)-C(29)-C(30)-C(31) | 0.6(6)    |

|                           |           |
|---------------------------|-----------|
| C(34)-C(29)-C(30)-C(31)   | 176.5(4)  |
| C(29)-C(30)-C(31)-C(32)   | -0.3(7)   |
| C(29)-C(30)-C(31)-C(35)   | -179.8(4) |
| C(30)-C(31)-C(32)-C(33)   | -0.2(6)   |
| C(35)-C(31)-C(32)-C(33)   | 179.3(4)  |
| C(31)-C(32)-C(33)-C(28)   | 0.4(6)    |
| C(31)-C(32)-C(33)-C(36)   | -177.8(4) |
| C(29)-C(28)-C(33)-C(32)   | 0.0(6)    |
| C(25)-C(28)-C(33)-C(32)   | -178.2(4) |
| C(29)-C(28)-C(33)-C(36)   | 178.1(4)  |
| C(25)-C(28)-C(33)-C(36)   | 0.0(5)    |
| N(1)-Cu(1)-C(37)-C(38)    | 38.9(5)   |
| N(3)-Cu(1)-C(37)-C(38)    | 168.5(3)  |
| N(5)-Cu(1)-C(37)-C(38)    | -96.8(3)  |
| Cu(1)-C(37)-C(38)-C(39)   | 176.7(10) |
| N(1)-Cu(1)-C(38)-C(37)    | -157.6(3) |
| N(3)-Cu(1)-C(38)-C(37)    | -18.9(5)  |
| N(5)-Cu(1)-C(38)-C(37)    | 102.0(3)  |
| C(37)-Cu(1)-C(38)-C(39)   | -177.6(7) |
| N(1)-Cu(1)-C(38)-C(39)    | 24.8(5)   |
| N(3)-Cu(1)-C(38)-C(39)    | 163.5(4)  |
| N(5)-Cu(1)-C(38)-C(39)    | -75.6(5)  |
| C(37)-C(38)-C(39)-O(1)    | -144.8(9) |
| Cu(1)-C(38)-C(39)-O(1)    | 30.5(8)   |
| C(37)-C(38)-C(39)-O(2A)   | 20.8(13)  |
| Cu(1)-C(38)-C(39)-O(2A)   | -164.0(6) |
| C(37)-C(38)-C(39)-O(2B)   | 44.3(11)  |
| Cu(1)-C(38)-C(39)-O(2B)   | -140.4(6) |
| O(1)-C(39)-O(2A)-C(40A)   | -6.5(12)  |
| O(2B)-C(39)-O(2A)-C(40A)  | 116(2)    |
| C(38)-C(39)-O(2A)-C(40A)  | -173.5(7) |
| C(39)-O(2A)-C(40A)-C(41A) | -169.5(9) |
| O(1)-C(39)-O(2B)-C(40B)   | 11.1(12)  |
| O(2A)-C(39)-O(2B)-C(40B)  | -61.3(19) |
| C(38)-C(39)-O(2B)-C(40B)  | -178.2(8) |
| C(39)-O(2B)-C(40B)-C(41B) | 85.1(15)  |
| C(27)-N(6)-B(1)-N(2)      | 119.6(4)  |
| N(5)-N(6)-B(1)-N(2)       | -60.0(5)  |

|                         |           |
|-------------------------|-----------|
| C(27)-N(6)-B(1)-N(4)    | -120.8(4) |
| N(5)-N(6)-B(1)-N(4)     | 59.6(5)   |
| C(3)-N(2)-B(1)-N(6)     | -119.3(4) |
| N(1)-N(2)-B(1)-N(6)     | 64.8(4)   |
| C(3)-N(2)-B(1)-N(4)     | 120.7(4)  |
| N(1)-N(2)-B(1)-N(4)     | -55.2(4)  |
| C(15)-N(4)-B(1)-N(6)    | 114.5(4)  |
| N(3)-N(4)-B(1)-N(6)     | -58.0(5)  |
| C(15)-N(4)-B(1)-N(2)    | -125.3(4) |
| N(3)-N(4)-B(1)-N(2)     | 62.2(4)   |
| C(78)-Cu(2)-N(7)-C(42)  | 17.2(5)   |
| C(79)-Cu(2)-N(7)-C(42)  | 14.4(6)   |
| N(9)-Cu(2)-N(7)-C(42)   | -131.9(4) |
| N(11)-Cu(2)-N(7)-C(42)  | 140.8(4)  |
| C(78)-Cu(2)-N(7)-N(8)   | -169.2(3) |
| C(79)-Cu(2)-N(7)-N(8)   | -171.9(3) |
| N(9)-Cu(2)-N(7)-N(8)    | 41.7(3)   |
| N(11)-Cu(2)-N(7)-N(8)   | -45.6(3)  |
| C(42)-N(7)-N(8)-C(44)   | 0.1(4)    |
| Cu(2)-N(7)-N(8)-C(44)   | -175.3(3) |
| C(42)-N(7)-N(8)-B(2)    | 179.1(3)  |
| Cu(2)-N(7)-N(8)-B(2)    | 3.6(4)    |
| C(78)-Cu(2)-N(9)-C(54)  | 9.2(5)    |
| C(79)-Cu(2)-N(9)-C(54)  | -22.5(4)  |
| N(7)-Cu(2)-N(9)-C(54)   | 137.7(4)  |
| N(11)-Cu(2)-N(9)-C(54)  | -131.1(4) |
| C(78)-Cu(2)-N(9)-N(10)  | -172.4(3) |
| C(79)-Cu(2)-N(9)-N(10)  | 155.9(2)  |
| N(7)-Cu(2)-N(9)-N(10)   | -43.9(3)  |
| N(11)-Cu(2)-N(9)-N(10)  | 47.3(3)   |
| C(54)-N(9)-N(10)-C(56)  | 0.1(4)    |
| Cu(2)-N(9)-N(10)-C(56)  | -178.7(2) |
| C(54)-N(9)-N(10)-B(2)   | 179.0(3)  |
| Cu(2)-N(9)-N(10)-B(2)   | 0.1(4)    |
| C(78)-Cu(2)-N(11)-C(66) | -28.9(5)  |
| C(79)-Cu(2)-N(11)-C(66) | 8.4(5)    |
| N(7)-Cu(2)-N(11)-C(66)  | -143.7(5) |
| N(9)-Cu(2)-N(11)-C(66)  | 124.0(5)  |

|                         |           |
|-------------------------|-----------|
| C(78)-Cu(2)-N(11)-N(12) | 156.1(3)  |
| C(79)-Cu(2)-N(11)-N(12) | -166.6(3) |
| N(7)-Cu(2)-N(11)-N(12)  | 41.3(3)   |
| N(9)-Cu(2)-N(11)-N(12)  | -51.0(3)  |
| C(66)-N(11)-N(12)-C(68) | -0.2(5)   |
| Cu(2)-N(11)-N(12)-C(68) | 176.5(3)  |
| C(66)-N(11)-N(12)-B(2)  | -170.9(3) |
| Cu(2)-N(11)-N(12)-B(2)  | 5.8(4)    |
| N(8)-N(7)-C(42)-C(43)   | 0.3(4)    |
| Cu(2)-N(7)-C(42)-C(43)  | 174.3(3)  |
| N(8)-N(7)-C(42)-C(45)   | 179.9(3)  |
| Cu(2)-N(7)-C(42)-C(45)  | -6.0(6)   |
| N(7)-C(42)-C(43)-C(44)  | -0.6(5)   |
| C(45)-C(42)-C(43)-C(44) | 179.8(4)  |
| N(7)-N(8)-C(44)-C(43)   | -0.5(5)   |
| B(2)-N(8)-C(44)-C(43)   | -179.4(4) |
| C(42)-C(43)-C(44)-N(8)  | 0.7(5)    |
| N(7)-C(42)-C(45)-C(46)  | 104.6(4)  |
| C(43)-C(42)-C(45)-C(46) | -75.8(6)  |
| N(7)-C(42)-C(45)-C(50)  | -73.6(5)  |
| C(43)-C(42)-C(45)-C(50) | 105.9(5)  |
| C(50)-C(45)-C(46)-C(47) | 2.2(6)    |
| C(42)-C(45)-C(46)-C(47) | -176.0(3) |
| C(50)-C(45)-C(46)-C(51) | -177.2(4) |
| C(42)-C(45)-C(46)-C(51) | 4.5(6)    |
| C(45)-C(46)-C(47)-C(48) | 0.1(6)    |
| C(51)-C(46)-C(47)-C(48) | 179.5(4)  |
| C(46)-C(47)-C(48)-C(49) | -1.7(6)   |
| C(46)-C(47)-C(48)-C(52) | -179.9(4) |
| C(47)-C(48)-C(49)-C(50) | 1.0(6)    |
| C(52)-C(48)-C(49)-C(50) | 179.2(4)  |
| C(48)-C(49)-C(50)-C(45) | 1.3(6)    |
| C(48)-C(49)-C(50)-C(53) | -179.5(4) |
| C(46)-C(45)-C(50)-C(49) | -2.9(5)   |
| C(42)-C(45)-C(50)-C(49) | 175.4(4)  |
| C(46)-C(45)-C(50)-C(53) | 177.9(4)  |
| C(42)-C(45)-C(50)-C(53) | -3.9(5)   |
| N(10)-N(9)-C(54)-C(55)  | -0.9(4)   |

|                         |           |
|-------------------------|-----------|
| Cu(2)-N(9)-C(54)-C(55)  | 177.6(3)  |
| N(10)-N(9)-C(54)-C(57)  | 176.1(3)  |
| Cu(2)-N(9)-C(54)-C(57)  | -5.4(6)   |
| N(9)-C(54)-C(55)-C(56)  | 1.3(4)    |
| C(57)-C(54)-C(55)-C(56) | -175.4(4) |
| N(9)-N(10)-C(56)-C(55)  | 0.6(4)    |
| B(2)-N(10)-C(56)-C(55)  | -178.0(3) |
| C(54)-C(55)-C(56)-N(10) | -1.1(4)   |
| N(9)-C(54)-C(57)-C(58)  | 114.8(4)  |
| C(55)-C(54)-C(57)-C(58) | -68.9(6)  |
| N(9)-C(54)-C(57)-C(62)  | -65.5(5)  |
| C(55)-C(54)-C(57)-C(62) | 110.8(5)  |
| C(62)-C(57)-C(58)-C(59) | 1.2(6)    |
| C(54)-C(57)-C(58)-C(59) | -179.1(4) |
| C(62)-C(57)-C(58)-C(63) | -179.2(4) |
| C(54)-C(57)-C(58)-C(63) | 0.5(6)    |
| C(57)-C(58)-C(59)-C(60) | -0.4(6)   |
| C(63)-C(58)-C(59)-C(60) | -180.0(4) |
| C(58)-C(59)-C(60)-C(61) | -0.2(6)   |
| C(58)-C(59)-C(60)-C(64) | 179.4(4)  |
| C(59)-C(60)-C(61)-C(62) | -0.2(7)   |
| C(64)-C(60)-C(61)-C(62) | -179.8(4) |
| C(60)-C(61)-C(62)-C(57) | 1.0(7)    |
| C(60)-C(61)-C(62)-C(65) | -179.9(4) |
| C(58)-C(57)-C(62)-C(61) | -1.5(6)   |
| C(54)-C(57)-C(62)-C(61) | 178.8(4)  |
| C(58)-C(57)-C(62)-C(65) | 179.4(4)  |
| C(54)-C(57)-C(62)-C(65) | -0.4(6)   |
| N(12)-N(11)-C(66)-C(67) | 0.0(5)    |
| Cu(2)-N(11)-C(66)-C(67) | -175.2(4) |
| N(12)-N(11)-C(66)-C(69) | 177.4(4)  |
| Cu(2)-N(11)-C(66)-C(69) | 2.2(7)    |
| N(11)-C(66)-C(67)-C(68) | 0.2(5)    |
| C(69)-C(66)-C(67)-C(68) | -176.9(4) |
| N(11)-N(12)-C(68)-C(67) | 0.3(5)    |
| B(2)-N(12)-C(68)-C(67)  | 169.9(4)  |
| C(66)-C(67)-C(68)-N(12) | -0.3(5)   |
| N(11)-C(66)-C(69)-C(70) | 83.4(5)   |

|                         |           |
|-------------------------|-----------|
| C(67)-C(66)-C(69)-C(70) | -99.8(6)  |
| N(11)-C(66)-C(69)-C(74) | -97.9(5)  |
| C(67)-C(66)-C(69)-C(74) | 78.9(6)   |
| C(74)-C(69)-C(70)-C(71) | 1.8(6)    |
| C(66)-C(69)-C(70)-C(71) | -179.5(4) |
| C(74)-C(69)-C(70)-C(75) | -178.4(4) |
| C(66)-C(69)-C(70)-C(75) | 0.3(6)    |
| C(69)-C(70)-C(71)-C(72) | -0.2(7)   |
| C(75)-C(70)-C(71)-C(72) | -179.9(5) |
| C(70)-C(71)-C(72)-C(73) | -1.7(7)   |
| C(70)-C(71)-C(72)-C(76) | -179.2(5) |
| C(71)-C(72)-C(73)-C(74) | 2.0(7)    |
| C(76)-C(72)-C(73)-C(74) | 179.4(5)  |
| C(72)-C(73)-C(74)-C(69) | -0.4(7)   |
| C(72)-C(73)-C(74)-C(77) | 178.2(5)  |
| C(70)-C(69)-C(74)-C(73) | -1.5(6)   |
| C(66)-C(69)-C(74)-C(73) | 179.7(4)  |
| C(70)-C(69)-C(74)-C(77) | 179.9(4)  |
| C(66)-C(69)-C(74)-C(77) | 1.2(6)    |
| N(7)-Cu(2)-C(78)-C(79)  | -177.4(3) |
| N(9)-Cu(2)-C(78)-C(79)  | -54.0(4)  |
| N(11)-Cu(2)-C(78)-C(79) | 78.2(3)   |
| Cu(2)-C(78)-C(79)-C(80) | -175.9(9) |
| N(7)-Cu(2)-C(79)-C(78)  | 4.4(5)    |
| N(9)-Cu(2)-C(79)-C(78)  | 146.7(3)  |
| N(11)-Cu(2)-C(79)-C(78) | -117.7(3) |
| C(78)-Cu(2)-C(79)-C(80) | 177.2(6)  |
| N(7)-Cu(2)-C(79)-C(80)  | -178.4(3) |
| N(9)-Cu(2)-C(79)-C(80)  | -36.1(5)  |
| N(11)-Cu(2)-C(79)-C(80) | 59.5(5)   |
| C(81)-O(4)-C(80)-O(3)   | 1.2(6)    |
| C(81)-O(4)-C(80)-C(79)  | -178.7(4) |
| C(78)-C(79)-C(80)-O(3)  | -177.9(8) |
| Cu(2)-C(79)-C(80)-O(3)  | 7.8(7)    |
| C(78)-C(79)-C(80)-O(4)  | 1.9(11)   |
| Cu(2)-C(79)-C(80)-O(4)  | -172.4(3) |
| C(80)-O(4)-C(81)-C(82)  | -175.9(4) |
| C(68)-N(12)-B(2)-N(10)  | -112.3(4) |



|                        |           |
|------------------------|-----------|
| N(11)-N(12)-B(2)-N(10) | 56.4(4)   |
| C(68)-N(12)-B(2)-N(8)  | 129.5(4)  |
| N(11)-N(12)-B(2)-N(8)  | -61.8(5)  |
| C(56)-N(10)-B(2)-N(12) | 116.2(4)  |
| N(9)-N(10)-B(2)-N(12)  | -62.4(4)  |
| C(56)-N(10)-B(2)-N(8)  | -124.8(4) |
| N(9)-N(10)-B(2)-N(8)   | 56.7(4)   |
| C(44)-N(8)-B(2)-N(12)  | -123.1(4) |
| N(7)-N(8)-B(2)-N(12)   | 58.2(5)   |
| C(44)-N(8)-B(2)-N(10)  | 118.9(4)  |
| N(7)-N(8)-B(2)-N(10)   | -59.9(4)  |

---

Symmetry transformations used to generate equivalent atoms:
